# Supplementary material for: Platelet-to-lymphocyte ratio as a prognostic predictor of mortality for sepsis: interaction effect with disease severity—a retrospective study
Source: PubMed Central journal article supplement — BMJ Open. 2019 Jan 25;9(1):e022896. doi: 10.1136/bmjopen-2018-022896 (PMC6352809; doi:10.1136/bmjopen-2018-022896), 2019-01-25

**Table S1 Adjusted odds ratio of hospital mortality using PLR as design variable in multivariable logistic regression**

| <b>Variables</b>                           | <b>Odds ratio</b> | <b>95% CI</b>   | <b>p</b>  |
|--------------------------------------------|-------------------|-----------------|-----------|
| <b>PLR Level 1 (<math>\leq 150</math>)</b> | 1.15              | 0.96 – 1.38     | 0.123     |
| <b>PLR Level 2 (151 ~ 250)</b>             | Ref.              | –               | –         |
| <b>PLR Level 3 (<math>&gt; 250</math>)</b> | 1.29              | 1.09 – 1.53     | 0.003     |
| <b>Age (<math>&gt; 65</math>)</b>          | 2.27              | 1.97 – 2.62     | $< 0.001$ |
| <b>Maximum SOFA</b>                        | 1.19              | 1.16 – 1.21     | $< 0.001$ |
| <b>Urinary infection</b>                   | 0.65              | 0.56 – 0.76     | $< 0.001$ |
| <b>Respiratory infection</b>               | 1.25              | 1.08 – 1.44     | 0.002     |
| <b>Blood infection</b>                     | 1.49              | 1.29 – 1.71     | $< 0.001$ |
| <b>Fluid balance (ml/kg/48hrs)</b>         | 1.002             | 1.0008 – 1.0031 | 0.001     |
| <b>MICU</b>                                | 1.16              | 0.98 – 1.37     | 0.082     |
| <b>CCU/CSRU</b>                            | 1.04              | 0.84 – 1.27     | 0.700     |

Note: The mean variance inflation factor (VIF) was 2.53 and p value of goodness of fit was 0.665.

Abbreviation: PLR platelet to lymphocyte ratio; CI confidence interval; SOFA sequential organ failure assessment; MICU multiple intensive care unit; CCU coronary care unit; CSRU cardiac surgery care unit.

Table S2 Comparisons of subgroups according to the existence of vasopressor use, AKI and SOFA score

| Variables                                  | Vasopressor-use<br>(n = 2554) | Non-Vasopressor-use<br>(n = 2983) | p       | AKI<br>(n = 2542) | Non-AKI<br>(n = 2995) | p       | SOFA > 10<br>(n = 2390) | SOFA <= 10<br>(n = 2147) | p       |
|--------------------------------------------|-------------------------------|-----------------------------------|---------|-------------------|-----------------------|---------|-------------------------|--------------------------|---------|
| <b>age</b>                                 | 66.3 ± 15.2                   | 63.6 ± 16.8                       | < 0.001 | 65.1 ± 15.4       | 64.6 ± 16.8           | 0.211   | 64.0 ± 15.7             | 65.5 ± 16.4              | < 0.001 |
| <b>Vasopressor-use [n (%)]</b>             | -                             | -                                 | -       | 1321              | 1233                  | < 0.001 | 1554                    | 1000                     | < 0.001 |
| <b>Fluid intake (ml/kg/48hr)</b>           | 114.4 ± 661.                  | 81.1 ± 50.0                       | < 0.001 | 94.3 ± 62.0       | 98.3 ± 58.8           | 0.013   | 110.7 ± 65.5            | 85.6 ± 53.6              | < 0.001 |
| <b>Fluid balance (ml/kg/48hr)</b>          | 63.2 ± 64.1                   | 28.1 ± 48.5                       | < 0.001 | 48.4 ± 60.9       | 40.8 ± 56.9           | < 0.001 | 62.0 ± 64.1             | 30.8 ± 50.6              | < 0.001 |
| <b>Maximum SOFA median (IQR)</b>           | 12 (9 – 14)                   | 8 (6 – 11)                        | < 0.001 | 11 (8 – 14)       | 9 (7 – 11)            | < 0.001 | 13 (12 – 15)            | 7 (6 – 9)                | < 0.001 |
| <b>Platelet count (10<sup>9</sup>/L)</b>   | 225.0 ± 240.1                 | 236.0 ± 148.7                     | 0.005   | 219.2 ±<br>143.4  | 240.9 ± 145.5         | < 0.001 | 208.4 ± 147.1           | 248.1 ± 140.8            | < 0.001 |
| <b>Lymphocyte count (10<sup>9</sup>/L)</b> | 1.26 ± 3.32                   | 1.28 ± 3.32                       | 0.890   | 1.21 ± 2.21       | 1.32 ± 4.03           | 0.246   | 1.24 ± 3.42             | 1.29 ± 3.24              | 0.529   |
| <b>Hospital LOS</b>                        | 17.8 ± 14.3                   | 16.7 ± 14.1                       | 0.002   | 19.7 ± 15.6       | 15.1 ± 12.3           | < 0.001 | 19.6 ± 14.6             | 15.5 ± 13.4              | < 0.001 |
| <b>AKI [n (%)]</b>                         | 1321                          | 1221                              | < 0.001 | -                 | -                     | -       | 1360                    | 1182                     | < 0.001 |
| <b>Hospital mortality [n (%)]</b>          | 777                           | 612                               | < 0.001 | 875               | 514                   | < 0.001 | 884                     | 505                      | < 0.001 |

Abbreviation: SOFA sequential organ failure assessment; IQR interquartile range; LOS length of stay; AKI acute kidney injury.

**Table S3 Risk factors associated with in-hospital mortality**

| <b>Variables</b>                           | <b>Odds ratio</b> | <b>95% CI</b> | <b>p</b> |
|--------------------------------------------|-------------------|---------------|----------|
| <b>Age (&gt; 65)</b>                       | 1.77              | 1.56 – 2.01   | < 0.001  |
| <b>Gender (male)</b>                       | 0.91              | 0.81 – 1.03   | 0.173    |
| <b>BMI (Kg/m<sup>2</sup>)</b>              | 1.00              | 0.99 – 1.00   | 0.485    |
| <b>TSICU/SICU</b>                          | Ref.              | –             | –        |
| <b>MICU</b>                                | 1.34              | 1.15 – 1.56   | < 0.001  |
| <b>CCU/CSRU</b>                            | 1.22              | 1.01 – 1.47   | 0.032    |
| <b>Fluid balance (ml/kg/48hrs)</b>         | 1.006             | 1.005 – 1.007 | < 0.001  |
| <b>Urine output (ml/kg/48hrs)</b>          | 0.98              | 0.98 – 0.98   | < 0.001  |
| <b>Respiratory infection</b>               | 1.29              | 1.13 – 1.47   | < 0.001  |
| <b>Blood infection</b>                     | 2.14              | 1.89 – 2.42   | < 0.001  |
| <b>Urinary infection</b>                   | 0.66              | 0.57 – 0.76   | < 0.001  |
| <b>Abdominal infection</b>                 | 0.93              | 0.77 – 1.11   | 0.458    |
| <b>Cerebral infection</b>                  | 0.66              | 0.51 – 0.85   | 0.002    |
| <b>SOFA on ICU admission</b>               | 1.15              | 1.13 – 1.17   | < 0.001  |
| <b>Maximum SOFA</b>                        | 1.20              | 1.18 – 1.22   | < 0.001  |
| <b>Maximum serum creatinine (mg/L)</b>     | 1.15              | 1.12 – 1.19   | < 0.001  |
| <b>Minimum hemoglobin level (g/dl)</b>     | 0.84              | 0.81 – 0.88   | < 0.001  |
| <b>Maximum serum sodium (mmol/L)</b>       | 1.02              | 1.01 – 1.02   | < 0.001  |
| <b>Platelet count (10<sup>9</sup>/L)</b>   | 0.998             | 0.997 – 0.998 | < 0.001  |
| <b>Lymphocyte count (10<sup>9</sup>/L)</b> | 0.972             | 0.934 – 1.01  | 0.163    |

Abbreviations: BMI body mass index; MICU, multiple intensive care unit; CCU, coronary care unit; CSRU, cardiac surgery care unit; TSICU, traumatic surgical intensive care unit; SICU, surgical intensive care unit; SOFA, sequential organ failure assessment;

Figure S1 Crude relationship between hospital mortality and PLR

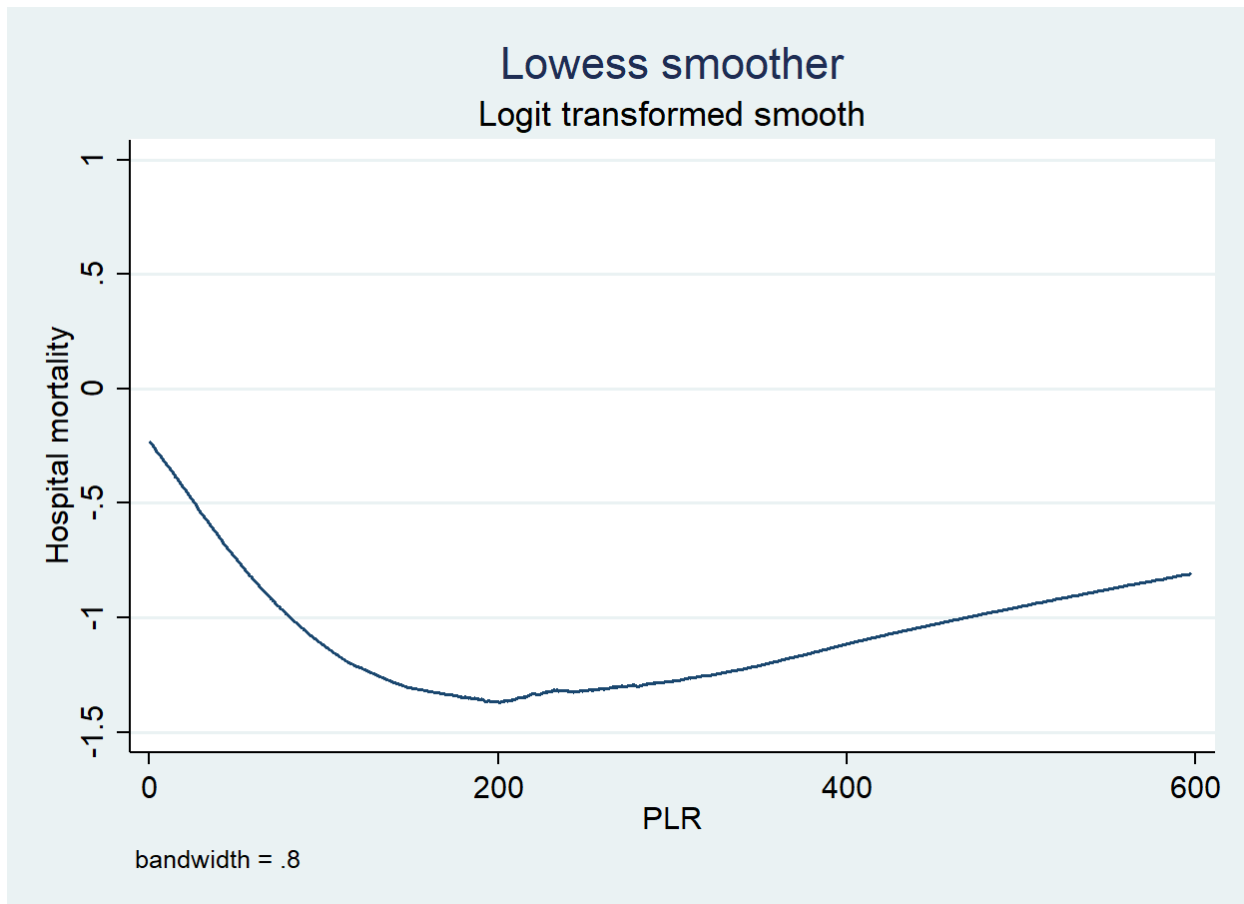

Supplement: bmjopen-2018-022896supp001.pdf [file bmjopen-2018-022896supp001.pdf]
