# Supplementary material for: Platelet-to-lymphocyte ratio as a prognostic predictor of mortality for sepsis: interaction effect with disease severity—a retrospective study
Source: PubMed Central journal article supplement — BMJ Open. 2019 Jan 25;9(1):e022896. doi: 10.1136/bmjopen-2018-022896 (PMC6352809; doi:10.1136/bmjopen-2018-022896), 2019-01-25
Supplement: bmjopen-2018-022896.draft_revisions.pdf [file bmjopen-2018-022896.draft_revisions.pdf]

# BMJ Open

BMJ Open is committed to open peer review. As part of this commitment we make the peer review history of every article we publish publicly available.

When an article is published we post the peer reviewers' comments and the authors' responses online. We also post the versions of the paper that were used during peer review. These are the versions that the peer review comments apply to.

The versions of the paper that follow are the versions that were submitted during the peer review process. They are not the versions of record or the final published versions. They should not be cited or distributed as the published version of this manuscript.

BMJ Open is an open access journal and the full, final, typeset and author-corrected version of record of the manuscript is available on our site with no access controls, subscription charges or pay-per-view fees (<http://bmjopen.bmj.com>).

If you have any questions on BMJ Open's open peer review process please email [info.bmjopen@bmj.com](mailto:info.bmjopen@bmj.com)

# BMJ Open

## **Platelet-to-lymphocyte ratio as a prognostic predictor of mortality for sepsis: Interaction effect with disease severity. A retrospective study.**

|                               |                                                                                                                                                                                             |
|-------------------------------|---------------------------------------------------------------------------------------------------------------------------------------------------------------------------------------------|
| Journal:                      | <i>BMJ Open</i>                                                                                                                                                                             |
| Manuscript ID                 | bmjopen-2018-022896                                                                                                                                                                         |
| Article Type:                 | Research                                                                                                                                                                                    |
| Date Submitted by the Author: | 12-Mar-2018                                                                                                                                                                                 |
| Complete List of Authors:     | Shen, Yanfei; Intensive Care Unit<br>Huang, Xinmei; Jinhua TCM hospital, Department of otolaryngological<br>Zhang, Weimin; Department of Intensive Care Unit, Dongyang People's<br>Hospital |
| Keywords:                     | sepsis, PLR, mortality, MIMIC III                                                                                                                                                           |
|                               |                                                                                                                                                                                             |

SCHOLARONE™  
Manuscripts

Peer Review Only

**Title page**

Platelet-to-lymphocyte ratio as a prognostic predictor of mortality for sepsis:  
Interaction effect with disease severity. A retrospective study.

**Author names:** Yanfei Shen<sup>1\*</sup>, Xinmei Huang<sup>2#</sup>, Weimin Zhang<sup>1</sup>.

**Affiliations:**

1. Department of Intensive Care Unit, Dongyang People's Hospital, No. 60, Wuning  
West Road, Dongyang, Zhejiang, 322100, P.R. China.

2. Department of otolaryngological, Jinhua TCM hospital, No. 439, Shuangxi West  
Road, Jinhua, Zhejiang, 322100, P.R. China.

# Author Xinmei Huang contributed equally to this study and was listed as co-first  
author.

\* **Corresponding author:** Yanfei Shen.

E-mail: snow.shen@hotmail.com

Phone: +86-137-3890-3218

Word count: 3316.

## Abstract

**Objective:** The role of platelet-to-lymphocyte ratio (PLR) as an indicator of inflammation has been receiving research attention. We aimed to investigate the predictive value of PLR for sepsis.

**Design:** A retrospective cohort study.

**Setting and Participants:** Data were extracted from the Multi-parameter Intelligent Monitoring in Intensive Care III database. Data on 5,537 sepsis patients were analyzed.

**Methods:** Logistic regression was used to explore the association between PLR and hospital mortality. Subgroup analyses were performed based on vasopressor use, acute kidney injury (AKI), and a Sequential Organ Failure Assessment (SOFA) score > 10.

**Results:** In the logistic model with linear spline function, a PLR > 200 was significantly (odds ratio [OR], 1.0002; 95% confidence interval [CI], 1.0001 – 1.0004) associated with mortality; the association was insignificant for PLRs  $\leq$  200 (OR, 0.997; 95% CI, 1.19 – 1.67). In the logistic model using the PLR as a design variable, only high PLRs were significantly associated with mortality (OR, 1.29; 95% CI, 1.09 – 1.53); the association with low PLRs was insignificant (OR, 1.15; 95% CI, 0.96 – 1.38). In the subgroups with vasopressor use, AKI and a SOFA score > 10, the association between high PLR and mortality was insignificant; this remained significant in the subgroups without vasopressor use (OR, 1.39; 95% CI, 1.08 – 1.77) and AKI (OR, 1.54; 95% CI, 1.20 – 1.99), and with a SOFA score  $\leq$  10 (OR, 1.51; 95% CI, 1.17 – 1.94).

1  
2  
3  
4 **Conclusions:** High PLRs at admission were associated with an increased risk of  
5  
6 mortality. In patients with vasopressor use, AKI or a SOFA score > 10, this association  
7  
8 was insignificant.  
9

10  
11 **Keywords:** sepsis, PLR, mortality, MIMIC III.  
12  
13

14  
15 **Strengths and limitations of this study:**  
16

17 The large sample size facilitated a robust conclusion.  
18

19 Subgroup analysis was performed to investigate the interaction between disease  
20 severity and PLR.  
21

22 High PLRs was associated with an increased risk of mortality in sepsis patients  
23 without vasopressor use, AKI or a SOFA score > 10.  
24

25 In sepsis patients with severe condition (vasopressor use, AKI or a SOFA score > 10),  
26 the association between PLRs and mortality was insignificant.  
27  
28  
29  
30  
31  
32  
33  
34  
35  
36  
37  
38  
39  
40  
41  
42  
43  
44  
45  
46  
47  
48  
49  
50  
51  
52  
53  
54  
55  
56  
57  
58  
59  
60

## INTRODUCTION

Sepsis is a major cause of morbidity and mortality, worldwide, and it results from a dysregulation of the systemic inflammatory response to infection<sup>1,2</sup>. Despite significant advances in the pathophysiology and therapeutic strategies for sepsis, the mortality remains high<sup>3</sup>, at 300 deaths per 100,000 people<sup>4</sup>. An extremely complex systemic expression of inflammatory and anti-inflammatory response plays a critical role in the pathophysiological process of sepsis, which is strongly associated with an increased risk of mortality<sup>5</sup>. Identifying patients who are at a high risk of poor outcomes, in the early stage of sepsis, is vital for timely and adequate intervention<sup>6</sup>. While a significant amount of effort has been put into investigating promising biomarkers, the challenge of identifying these at-risk patients remains<sup>7</sup>.

In recent years, studies have reported that platelets and lymphocytes play critical roles in the inflammatory process. Therefore, the platelet-to-lymphocyte ratio (PLR)--a novel inflammatory factor--has received research attention in recent times, as it may act as an indicator of inflammation<sup>8</sup> in a wide spectrum of diseases, such as myocardial infarction<sup>9</sup>, acute kidney injury (AKI)<sup>10</sup>, hepatocellular carcinoma<sup>11</sup>, and non-small cell lung cancer<sup>12</sup>.

Based on the findings of previous studies, it is reasonable to speculate the presence of a potential relationship between PLR and mortality for sepsis. However, no investigation has been conducted.

## MATERIALS AND METHODS

## Database introduction

All the data in the current study were extracted from an online international database--“Multi-parameter Intelligent Monitoring in Intensive Care III (MIMIC III)”—that was published by the Massachusetts Institute of Technology, with approval from the review boards of the Massachusetts Institute of Technology and Beth Israel Deaconess Medical Center. All the patients in the database were de-identified for privacy protection. This database included more than 58,000 patients who were admitted to the intensive care unit (ICU) of the Beth Israel Deaconess Medical Center from 2001 to 2008. Author Y Shen obtained access to this database (certification number: 1564657), and was responsible for data extraction.

## Inclusion and exclusion criteria

Adult patients meeting the criteria for sepsis were initially screened. The definition of sepsis was adapted from the recommendation in the Surviving Sepsis Campaign 2016<sup>13</sup>. Accordingly, sepsis was defined as the presence of a Sequential Organ Failure Assessment (SOFA) score  $\geq 2$  within 24 hours after ICU admission, accompanied by at least one infection site. The following criteria were used to exclude patients from this analysis: 1. Age lower than 18 years; 2. Having spent less than 48 hours in the ICU; and 3. Absence of data on the serum platelet and lymphocyte counts within 24 hours after ICU admission. For patients who were admitted to the ICU more than once, only the first ICU stay was considered in this study.

## Data extraction

1  
2  
3 Data on the demographic characteristics, laboratory outcomes, infection sites,  
4 vasopressor use, and disease severity score were extracted from the database. Only  
5  
6 patients with data on the serum platelet and lymphocyte counts within the first 24  
7  
8 hours after ICU admission were included. The first blood sample after ICU admission  
9  
10 was used to calculate the PLR, which was defined as the ratio of the absolute platelet  
11  
12 count and absolute lymphocyte count. Septic shock was considered as a special  
13  
14 subgroup of sepsis. However, it was difficult to identify patients with septic shock in  
15  
16 this database due to a lack of relevant information. Thus, data on vasopressor use  
17  
18 were extracted for the subgroup analysis. Vasopressor use was defined as the use of  
19  
20 any vasopressor agent, including norepinephrine, epinephrine, dobutamine,  
21  
22 dopamine or vasopressin, within 48 hours after ICU admission.  
23  
24  
25  
26  
27  
28  
29

### 30 Outcome definition

31  
32  
33 The primary endpoint was hospital mortality, which was defined as death  
34  
35 during hospitalization. The presence of AKI was defined according to the  
36  
37 Creatinine-based Kidney Disease Improving Global Outcome criteria without urine  
38  
39 output<sup>14 15</sup>. A 1.5-fold increase in the serum creatinine (SCr) level during the ICU stay,  
40  
41 relative to the level at the baseline, was considered as the presence of AKI. In the  
42  
43 present cohort, data on the baseline SCr values were missing in 20.3% of the cases.  
44  
45 For patients without previous SCr data, the estimated baseline SCr was calculated  
46  
47 using the following formula<sup>16</sup>:  $SCr = 0.74 - 0.2 \text{ (if female)} + 0.08 \text{ (if black)} + 0.0039 * \text{age (in years)}$ .  
48  
49  
50  
51  
52  
53

### 54 Management of missing data



1  
2  
3  
4 Variables with missing data are common in the MIMIC III database, as it  
5  
6 comprises more than 58,000 admissions. Variables with more than 20% of missing  
7  
8 values were excluded from our analysis; these included serum albumin and lactate.  
9  
10 For variables with less than 5% of missing values, such as age and fluid balance, we  
11  
12 replaced the missing values with the mean values, instead of using the multiple  
13  
14 imputation technique. For dichotomous variables with less than 5% of missing values,  
15  
16 the missing values were not filled.  
17  
18

#### 19 20 21 Statistical analysis

22  
23 Continuous variables were expressed as mean  $\pm$  standard deviation or median  
24  
25 (interquartile range), as appropriate. A Student's t test, analysis of variance, Wilcoxon  
26  
27 rank-sum test, or Kruskal–Wallis test was used, as appropriate. Categorical data were  
28  
29 expressed as proportions, and compared using the  $\chi^2$  test. A knot of PLR (at a level  
30  
31 of around 200) was detected using the Lowess smoother technique; thus, the linear  
32  
33 spline function was initially used in the multivariate logistic regression. Thereafter, all  
34  
35 the patients were further divided into three levels: those with a PLR  $\leq$  150 (level 1),  
36  
37 150 < PLR  $\leq$  250 (level 2), and PLR > 250 (level 3). Variables including demographic  
38  
39 characteristics, infection sites, disease severity score, and laboratory measures  
40  
41 potentially associated with mortality, or those that had a p value < 0.20 in the  
42  
43 univariate analyses were included in the multivariate logistic regression analyses. An  
44  
45 extended model approach was used for covariate adjustment: Model 1 = adjusted for  
46  
47 age, admitted ICU type. Model 2 = Model 1+ (fluid balance at 48 hours after ICU  
48  
49 admission). Model 3 = Model 2 + (infection sites). Model 4 = Model 3 + (Maximum  
50  
51  
52  
53  
54  
55  
56  
57  
58  
59  
60

1  
2  
3 SOFA score during the ICU stay). As we detected a U-shaped association between PLR  
4  
5 and mortality, we did not introduce interaction items (such as PLR multiply other  
6  
7 variables) in the logistic models. Instead, subgroup analyses were performed,  
8  
9 according to the presence of AKI and vasopressor use and the median SOFA score.  
10  
11 Multi-collinearity was tested using the variance inflation factor (VIF) method, with a  
12  
13 VIF  $\geq 5$  indicating the presence of multi-collinearity. All the logistic regression models  
14  
15 underwent a goodness of fit test. A two-tailed test was performed, and  $p < 0.05$  was  
16  
17 considered statistically significant. All statistical analyses were performed using STATA  
18  
19 11.2 (College Station, TX, USA).  
20  
21  
22  
23  
24  
25  
26  
27

## 28 RESULTS

### 29 Baseline characteristics

30  
31  
32 Data on a total of 5,537 sepsis patients were included in this analysis. The overall  
33  
34 mortality observed was 25.1%. Data on the comparisons of the baseline  
35  
36 characteristics between the three PLR levels are listed in Table 1. The mean age at  
37  
38 admission was 64.9 years, and 44.9% of the participants were male. The rate of  
39  
40 vasopressor use (701/1780 vs. 482/1380,  $p=0.01$ ), and a maximum SOFA score (10  
41  
42 (7–14) vs. 9 (7 – 12),  $p<0.001$ ) were significantly higher in PLR level 1 than level 2; the  
43  
44 presence of these variables was insignificant in level 3. The mortality was significantly  
45  
46 higher both in those in level 1 (475/1780 vs. 291/1380,  $p<0.001$ ) and level 3  
47  
48 (621/2377 vs. 291/1380,  $p=0.001$ ).  
49  
50  
51  
52  
53

### 54 Association between PLR and hospital mortality

1  
2  
3  
4 The PLR was initially used as a continuous variable in the logistic model, using  
5  
6 linear spline function, as shown in Table 2. We observed that, for PLRs  $\leq 200$ , the  
7  
8 odds ratio (OR) of mortality was insignificant (OR, 0.997; 95% confidence interval [CI],  
9  
10 1.19 – 1.67), while the OR for PLRs  $> 200$  was significant (OR, 1.0002; 95% CI, 1.0001  
11  
12 – 1.0004), after adjustment for covariates including the SOFA score. In the extended  
13  
14 multiple logistic regression analysis (Table 3), both low and the high PLR levels were  
15  
16 significantly associated with increased hospital mortality, in model 1 (OR, 1.41; 95%  
17  
18 CI, 1.19 – 1.67 and OR, 1.28; 95% CI, 1.09 – 1.51, respectively), model 2 (OR, 1.34; 95%  
19  
20 CI, 1.13 – 1.59 and OR, 1.23; 95% CI, 1.05 – 1.45, respectively) and model 3 (OR, 1.35;  
21  
22 95% CI, 1.14 – 1.61 and OR, 1.21; 95% CI, 1.03 – 1.43, respectively). However, after  
23  
24 adjustment for the maximum SOFA score in model 4, the OR for low PLR levels  
25  
26 became insignificant (OR, 1.15; 95% CI, 0.96 – 1.38,  $p=0.123$ ), while that for high PLR  
27  
28 levels remained significant (OR, 1.29; 95% CI, 1.09 – 1.53,  $p=0.003$ ). The ORs of the  
29  
30 covariates in model 4 are listed in Table S1.

### 31 32 33 34 35 36 37 38 Subgroup analysis

39  
40 As the association between PLR and mortality was largely confounded by the  
41  
42 SOFA score (Table 3), we suspected that there was an interaction effect between  
43  
44 disease severity and PLR level. Thus, we performed a subgroup analysis according to  
45  
46 the existence of vasopressor use and AKI, and the median SOFA score ( $> 10$  points),  
47  
48 as shown in Figure 1. Unlike previous findings, the association between high PLRs  
49  
50 and mortality became insignificant in the subgroups with vasopressor use (OR, 1.20;  
51  
52 95% CI, 0.95 – 1.53), AKI (OR, 1.07; 95% CI, 0.85 – 1.36), and a SOFA score  $> 10$  (OR,  
53  
54  
55  
56  
57  
58  
59  
60

1  
2  
3 1.14; 95% CI, 0.90 – 1.44), and remained significant in the subgroups without  
4  
5 vasopressor use (OR, 1.39; 95% CI, 1.08 – 1.77) and AKI (OR, 1.54; 95% CI, 1.20 –  
6  
7 1.99), and with a SOFA score  $\leq 10$  (OR, 1.51; 95% CI, 1.17 – 1.94). In the case of lower  
8  
9 PLRs, the OR of mortality was insignificant in all the subgroups, after adjustment,  
10  
11 except for the subgroup with AKI. Data on the comparisons of the characteristics  
12  
13 between these subgroups are listed in Table S2.  
14  
15  
16  
17  
18  
19  
20

## 21 **DISCUSSION**

22  
23 In this study, we observed a crude U-shaped association between the PLR and  
24  
25 hospital mortality in patients with sepsis. However, after adjustment for the disease  
26  
27 severity score, only high PLRs remained significantly associated with increased  
28  
29 mortality; the association with low PLRs became insignificant. Furthermore, in the  
30  
31 subgroup analysis, a significant association between high PLRs and mortality only  
32  
33 existed in the subgroups without vasopressor use and AKI, or those with a SOFA  
34  
35 score  $\leq 10$ .  
36  
37  
38  
39

40 Growing evidence indicates that immune dysregulation (especially cellular  
41  
42 immunity), including pro-inflammatory or anti-inflammatory responses during  
43  
44 different stages, is common in cases of sepsis<sup>17</sup>. In recent times, studies have  
45  
46 reported that platelets play an important role in both the immunomodulatory and  
47  
48 inflammatory process<sup>18,19</sup>, by inducing the release of inflammatory cytokines<sup>20</sup> and  
49  
50 interacting with different kinds of bacterias and immune cells, including neutrophils,  
51  
52 T-lymphocytes, NK-cells and macrophages, which contribute to the initiation or  
53  
54  
55  
56  
57  
58  
59  
60

1  
2  
3 exacerbation of the inflammatory process <sup>21</sup>. Low lymphocyte counts, which to a  
4  
5 certain degree represent a suppressed immune and inflammatory response <sup>22 23</sup>,  
6  
7  
8 have also been reported to be associated with inflammatory diseases, such as  
9  
10 cardiovascular disease <sup>24</sup> and type II diabetes <sup>25</sup>.  
11  
12

13 Based on these findings, the PLR was suggested as being a novel systematic  
14  
15 inflammatory indicator <sup>26</sup>, and its use was initially reported in the prognostic  
16  
17 prediction of neoplastic disorders, such as hepatocellular carcinoma and breast  
18  
19 cancer. Accumulating evidence suggests that elevated PLRs are strongly associated  
20  
21 with increased systemic inflammation, which may contribute to the progression and  
22  
23 prognoses of many disorders, such as atherosclerosis <sup>27</sup> and diabetes mellitus <sup>28</sup>.  
24  
25  
26  
27

28 In contrast to our findings, Zheng et al. <sup>10</sup> reported that both high and low PLRs  
29  
30 are associated with increased mortality, among critically ill patients with AKI, after  
31  
32 adjustment for the disease severity score in the Cox proportional hazards models. In  
33  
34 that study, unlike in ours, a significant association was also observed in patients with  
35  
36 vasopressin use. Several factors may contribute to this inconsistency between the  
37  
38 findings, such as the use of different cohorts, PLR knots, and definitions of  
39  
40 vasopressor use. It is worth noting that, as the association between PLRs and  
41  
42 outcomes varies greatly between different cohorts, the inter-heterogeneity within  
43  
44 critically ill patients may also lead to a biased conclusion.  
45  
46  
47  
48  
49

50 Akbas et al. indicated that a high PLR was positively associated with increased  
51  
52 epicardial adipose tissue deposition in diabetes patients <sup>29</sup>; this may be caused by  
53  
54 higher inflammation rates. Wang et al. <sup>30</sup> reviewed 134 patients with lung  
55  
56  
57  
58  
59  
60

1  
2  
3  
4 adenosquamous cancer, and reported that high PLRs ( $> 150$ ) were independently  
5  
6 associated with shorter disease-free days and lower overall survival rates. Another  
7  
8 study <sup>31</sup>, including 270 patients with hepatocellular carcinoma, found that elevated  
9  
10 PLRs (above 220) were predictors of poor prognoses, while low PLRs ( $< 248.0$ ) were  
11  
12 associated with a low tumor, node and metastasis stage, and low surgery incidence,  
13  
14 in 695 patients with lung cancer <sup>32</sup>. Despite the fact that the study cohorts used in  
15  
16 those studies were quite different from those used in ours, the reported PLR knots  
17  
18 were quite similar to ours. However, the small sample sizes in those studies limited  
19  
20 the statistical power for further stratification and subgroup analysis of low PLR. In the  
21  
22 current study, we noticed that high PLRs ( $> 250$ ) were associated with increased  
23  
24 hospital mortality. As higher platelet levels, to a certain extent, are predictive of  
25  
26 inflammation of a higher severity and low lymphocyte counts may represent a  
27  
28 suppressed immune and inflammatory response <sup>22 23</sup>, an increase in the PLR may  
29  
30 reflect the degree of the inflammatory and immune response to the infection, which  
31  
32 related to a poor prognosis.  
33  
34  
35  
36  
37  
38  
39

40 We also detected an insignificant association between low PLRs and mortality, in  
41  
42 the case of sepsis. The association between low PLRs and outcomes was also  
43  
44 reported in several studies. In a retrospective study <sup>33</sup> including 899 cases of  
45  
46 laryngeal cancer, patients were divided into three PLR categories (low ( $\leq 119.55$ ),  
47  
48 moderate ( $> 119.55$  and  $\leq 193.55$ ), and high ( $> 193.55$ )), and only patients with high  
49  
50 PLRs experienced poor outcomes, including malnutrition and more advanced cancer  
51  
52 stage; the association between outcomes and PLR levels were insignificant for those  
53  
54  
55  
56  
57  
58  
59  
60

1  
2  
3 with low PLRs. Despite the cohort of that study being different from ours, the  
4  
5 conclusion was consistent with that of our study. In the case of sepsis, a low platelet  
6  
7 count is potentially associated with poor outcomes. In a large study including 931  
8  
9 patients with sepsis, Claushuis et al. reported that patients with a low platelet count  
10  
11 at ICU admission had a higher disease severity score and increased mortality risk <sup>34</sup>.  
12  
13 Furthermore, thrombocytopenia--one of the most common hemostatic disorders in  
14  
15 the case of sepsis--which is related with platelet consumption, was also associated  
16  
17 with higher mortality <sup>35</sup>. However, in the present study, a significant association  
18  
19 between low PLR and mortality was not detected. Further studies are needed to  
20  
21 validate this conclusion.  
22  
23  
24  
25  
26

27  
28 Furthermore, according to the subgroup analysis, the association between high  
29  
30 PLR and mortality became insignificant in the subgroups with vasopressor use, AKI or  
31  
32 a SOFA score > 10; this association remained significant in the other subgroups. This  
33  
34 finding further supported our speculation that there may be an interaction between  
35  
36 PLR and disease severity. To the best of our knowledge, ours is the first study to  
37  
38 report this interaction. However, the underlying mechanism of this interaction  
39  
40 remains largely unknown. A critical characteristic of sepsis is fluid resuscitation, and,  
41  
42 in the current study, patients with vasopressor use, AKI or a SOFA score > 10, to a  
43  
44 certain degree, represented patients with inflammation of a higher severity, and they  
45  
46 may have a stronger need for fluid resuscitation. We also noticed that the fluid  
47  
48 balance within 48 hours after ICU admission was significantly larger in these  
49  
50 subgroups. It needs to be further investigated if fluid resuscitation affects the  
51  
52  
53  
54  
55  
56  
57  
58  
59  
60

1  
2  
3  
4 predictive value of the PLR.  
5

6 One of the strengths of our study is the large sample size, which enabled us to  
7  
8 adjust for confounding factors and perform subgroup analyses. However, there are  
9  
10 also several limitations to our study. First, the MIMIC III database comprises data on  
11  
12 patients from 2001; since then, the guidelines for sepsis have changed significantly.  
13  
14 The most recent definition of Sepsis 3.0 was used in the current study, and this may  
15  
16 have introduced selection bias despite the fact that most of the basic interventions  
17  
18 (use of fluids, vasopressors and antimicrobial agents) remained the same.  
19  
20 Furthermore, as a decrease in the platelet count was a part of the SOFA score, using  
21  
22 the definition of sepsis 3.0, to a certain degree, may lead to a relatively low mean  
23  
24 platelet count and potential multi-collinearity. This bias cannot be fully avoided.  
25  
26 However, the potential multi-collinearity was verified in all the logistic models.  
27  
28 Second, septic shock is a special subgroup of sepsis. However, patients with septic  
29  
30 shock could not be distinguished in this study. Thus, patients were divided into  
31  
32 subgroups, according to the existence of vasopressor use, AKI or a SOFA score >10,  
33  
34 which, to a certain extent, indicates the presence of an inflammatory response of a  
35  
36 higher severity. Third, one of the main hypotheses of our study was the interaction  
37  
38 effect between disease severity and PLR; yet, this interaction term was not  
39  
40 introduced in the logistic model due to the U-shaped association between PLR and  
41  
42 mortality. Further prospective studies are needed to verify our hypothesis. Finally, as  
43  
44 high PLRs are associated with poor outcomes in various disorders while low PLRs are  
45  
46 not, it is not clear if interventions aimed at changing the PLR value may improve  
47  
48  
49  
50  
51  
52  
53  
54  
55  
56  
57  
58  
59  
60



1  
2  
3  
4 outcomes.

5  
6 **Conclusion**

7  
8 In patients with sepsis, a high PLR was significantly associated with poor survival,  
9  
10 while the association was insignificant for those with a low PLR. However, the former  
11  
12 association became insignificant in patients with more severe conditions, including  
13  
14 those with vasopressor use, AKI or a SOFA score > 10. Future studies are needed to  
15  
16 verify our hypothesis.  
17  
18

19  
20 **Financial support and sponsorship:** This research received no specific grant from any  
21  
22 funding agency in the public, commercial or not-for-profit sectors.  
23

24 **Acknowledgments:** None.

25  
26 **Conflicts of interest:** None.

27  
28 **Authors' contributions:**

29 Yanfei Shen.: Responsible for data extraction and writing of the manuscript.

30 Xinmei Huang.: Responsible for data analysis.

31 Weimin Zhang.: Responsible for data validation.  
32  
33

34  
35 **Data sharing statement:** Full data set available from the corresponding author at  
36  
37 snow.shen@hotmail.com. However, reanalysis of the full data need to be approved by  
38  
39 MIMIC III Institute.  
40  
41  
42

43  
44 **REFERENCES**

- 45 1. Vincent JL. Emerging therapies for the treatment of sepsis. *Current opinion in anaesthesiology*  
46 2015;28(4):411-6.  
47 2. Cohen J, Vincent JL, Adhikari NK, Machado FR, Angus DC, Calandra T, et al. Sepsis: a roadmap for  
48 future research. *The Lancet. Infectious diseases* 2015;15(5):581-614.  
49 3. Angus DC, van der Poll T. Severe sepsis and septic shock. *The New England journal of medicine*  
50 2013;369(9):840-51.  
51 4. Peake SL, Delaney A, Bailey M, Bellomo R, Cameron PA, Cooper DJ, et al. Goal-directed resuscitation  
52 for patients with early septic shock. *The New England journal of medicine*  
53 2014;371(16):1496-506.  
54 5. Pierrakos C, Vincent JL. Sepsis biomarkers: a review. *Critical care (London, England)* 2010;14(1):R15.  
55  
56  
57  
58  
59  
60

- 1
- 2
- 3 6. Vincent JL, Pereira AJ, Gleeson J, Backer D. Early management of sepsis. *Clinical and experimental*
- 4 *emergency medicine* 2014;1(1):3-7.
- 5 7. Hwang YJ, Chung SP, Park YS, Chung HS, Lee HS, Park JW, et al. Newly designed delta neutrophil
- 6 index-to-serum albumin ratio prognosis of early mortality in severe sepsis. *The American*
- 7 *journal of emergency medicine* 2015;33(11):1577-82.
- 8 8. Kutlucan L, Kutlucan A, Basaran B, Dagli M, Basturk A, Kozanhan B, et al. The predictive effect of
- 9 initial complete blood count of intensive care unit patients on mortality, length of
- 10 hospitalization, and nosocomial infections. *European review for medical and pharmacological*
- 11 *sciences* 2016;20(8):1467-73.
- 12 9. Hudzik B, Szkodzinski J, Korzonek-Szlacheta I, Wilczek K, Gierlotka M, Lekston A, et al.
- 13 Platelet-to-lymphocyte ratio predicts contrast-induced acute kidney injury in diabetic patients
- 14 with ST-elevation myocardial infarction. *Biomarkers in medicine* 2017;11(10):847-56.
- 15 10. Zheng CF, Liu WY, Zeng FF, Zheng MH, Shi HY, Zhou Y, et al. Prognostic value of
- 16 platelet-to-lymphocyte ratios among critically ill patients with acute kidney injury. *Critical*
- 17 *care (London, England)* 2017;21(1):238.
- 18 11. Zheng J, Cai J, Li H, Zeng K, He L, Fu H, et al. Neutrophil to Lymphocyte Ratio and Platelet to
- 19 Lymphocyte Ratio as Prognostic Predictors for Hepatocellular Carcinoma Patients with
- 20 Various Treatments: a Meta-Analysis and Systematic Review. *Cellular physiology and*
- 21 *biochemistry : international journal of experimental cellular physiology, biochemistry, and*
- 22 *pharmacology* 2017;44(3):967-81.
- 23 12. Toda M, Tsukioka T, Izumi N, Komatsu H, Okada S, Hara K, et al. Platelet-to-lymphocyte ratio
- 24 predicts the prognosis of patients with non-small cell lung cancer treated with surgery and
- 25 postoperative adjuvant chemotherapy. *Thoracic cancer* 2017.
- 26 13. Singer M, Deutschman CS, Seymour CW, Shankar-Hari M, Annane D, Bauer M, et al. The Third
- 27 International Consensus Definitions for Sepsis and Septic Shock (Sepsis-3). *Jama*
- 28 2016;315(8):801-10.
- 29 14. Kellum JA, Lameire N. Diagnosis, evaluation, and management of acute kidney injury: a KDIGO
- 30 summary (Part 1). *Critical care (London, England)* 2013;17(1):204.
- 31 15. Lameire N, Kellum JA. Contrast-induced acute kidney injury and renal support for acute kidney
- 32 injury: a KDIGO summary (Part 2). *Critical care (London, England)* 2013;17(1):205.
- 33 16. Zavada J, Hoste E, Cartin-Ceba R, Calzavacca P, Gajic O, Clermont G, et al. A comparison of three
- 34 methods to estimate baseline creatinine for RIFLE classification. *Nephrology, dialysis,*
- 35 *transplantation : official publication of the European Dialysis and Transplant Association -*
- 36 *European Renal Association* 2010;25(12):3911-8.
- 37 17. Boomer JS, To K, Chang KC, Takasu O, Osborne DF, Walton AH, et al. Immunosuppression in
- 38 patients who die of sepsis and multiple organ failure. *Jama* 2011;306(23):2594-605.
- 39 18. Cho SY, Jeon YL, Kim W, Kim WS, Lee HJ, Lee WI, et al. Mean platelet volume and mean platelet
- 40 volume/platelet count ratio in infective endocarditis. *Platelets* 2014;25(8):559-61.
- 41 19. Azab B, Shah N, Akerman M, McGinn JT, Jr. Value of platelet/lymphocyte ratio as a predictor of
- 42 all-cause mortality after non-ST-elevation myocardial infarction. *Journal of thrombosis and*
- 43 *thrombolysis* 2012;34(3):326-34.
- 44 20. Nording HM, Seizer P, Langer HF. Platelets in inflammation and atherogenesis. *Frontiers in*
- 45 *immunology* 2015;6:98.
- 46 21. Kim CH, Kim SJ, Lee MJ, Kwon YE, Kim YL, Park KS, et al. An increase in mean platelet volume from
- 47
- 48
- 49
- 50
- 51
- 52
- 53
- 54
- 55
- 56
- 57
- 58
- 59
- 60

- baseline is associated with mortality in patients with severe sepsis or septic shock. *PLoS one* 2015;10(3):e0119437.
22. Manzoli TF, Delgado AF, Troster EJ, de Carvalho WB, Antunes AC, Marques DM, et al. Lymphocyte count as a sign of immunoparalysis and its correlation with nutritional status in pediatric intensive care patients with sepsis: A pilot study. *Clinics (Sao Paulo)* 2016;71(11):644-49.
  23. Felmet KA, Hall MW, Clark RS, Jaffe R, Carcillo JA. Prolonged lymphopenia, lymphoid depletion, and hypoprolactinemia in children with nosocomial sepsis and multiple organ failure. *J Immunol* 2005;174(6):3765-72.
  24. Nunez J, Minana G, Bodi V, Nunez E, Sanchis J, Husser O, et al. Low lymphocyte count and cardiovascular diseases. *Current medicinal chemistry* 2011;18(21):3226-33.
  25. Otton R, Soriano FG, Verlengia R, Curi R. Diabetes induces apoptosis in lymphocytes. *The Journal of endocrinology* 2004;182(1):145-56.
  26. Akboga MK, Canpolat U, Yayla C, Ozcan F, Ozeke O, Topaloglu S, et al. Association of Platelet to Lymphocyte Ratio With Inflammation and Severity of Coronary Atherosclerosis in Patients With Stable Coronary Artery Disease. *Angiology* 2016;67(1):89-95.
  27. Gary T, Pichler M, Belaj K, Hafner F, Gerger A, Froehlich H, et al. Platelet-to-lymphocyte ratio: a novel marker for critical limb ischemia in peripheral arterial occlusive disease patients. *PLoS one* 2013;8(7):e67688.
  28. Mertoglu C, Gunay M. Neutrophil-Lymphocyte ratio and Platelet-Lymphocyte ratio as useful predictive markers of prediabetes and diabetes mellitus. *Diabetes & metabolic syndrome* 2017;11 Suppl 1:S127-S31.
  29. Akbas EM, Hamur H, Demirtas L, Bakirci EM, Ozcicek A, Ozcicek F, et al. Predictors of epicardial adipose tissue in patients with type 2 diabetes mellitus. *Diabetology & metabolic syndrome* 2014;6:55.
  30. Wang YQ, Zhi QJ, Wang XY, Yue DS, Li K, Jiang RC. Prognostic value of combined platelet, fibrinogen, neutrophil to lymphocyte ratio and platelet to lymphocyte ratio in patients with lung adenocarcinoma. *Oncology letters* 2017;14(4):4331-38.
  31. Wang Y, Attar BM, Fuentes HE, Jaiswal P, Tafur AJ. Evaluation of the prognostic value of platelet to lymphocyte ratio in patients with hepatocellular carcinoma. *Journal of gastrointestinal oncology* 2017;8(6):1065-71.
  32. Wang L, Liang D, Xu X, Jin J, Li S, Tian G, et al. The prognostic value of neutrophil to lymphocyte and platelet to lymphocyte ratios for patients with lung cancer. *Oncology letters* 2017;14(6):6449-56.
  33. Mao Y, Fu Y, Gao Y, Yang A, Zhang Q. Platelet-to-lymphocyte ratio predicts long-term survival in laryngeal cancer. *European archives of oto-rhino-laryngology : official journal of the European Federation of Oto-Rhino-Laryngological Societies (EUFOS) : affiliated with the German Society for Oto-Rhino-Laryngology - Head and Neck Surgery* 2017.
  34. Claushuis TA, van Vught LA, Scicluna BP, Wiewel MA, Klein Klouwenberg PM, Hoogendijk AJ, et al. Thrombocytopenia is associated with a dysregulated host response in critically ill sepsis patients. *Blood* 2016;127(24):3062-72.
  35. Semeraro F, Colucci M, Caironi P, Masson S, Ammollo CT, Teli R, et al. Platelet Drop and Fibrinolytic Shutdown in Patients With Sepsis. *Critical care medicine* 2017.

Table 1 Comparison of baseline characteristics within three PLR levels

| Variable                                     | PLR ≤ 150<br>(n = 1780) | 150 < PLR ≤ 250<br>(n = 1380) | PLR > 250<br>(n = 2377) | p       |
|----------------------------------------------|-------------------------|-------------------------------|-------------------------|---------|
| Age (years)                                  | 63.0 ± 16.6             | 65.0 ± 16.6                   | 66.1 ± 15.5             | < 0.001 |
| Gender (male) [n (%)]                        | 805 (45.2)              | 590 (42.7)                    | 1096 (46.1)             | 0.133   |
| BMI (Kg/m <sup>2</sup> )                     | 30.8 ± 8.9              | 34.1 ± 13.5                   | 35.2 ± 39.5             | 0.001   |
| <b>Ethnicity</b>                             |                         |                               |                         |         |
| White [n (%)]                                | 1202 (67.5)             | 987 (71.5)                    | 1761 (74.0)             | 0.754   |
| Black [n (%)]                                | 180 (10.1)              | 101 (7.3)                     | 146 (6.1)               | < 0.001 |
| Asian [n (%)]                                | 39 (2.2)                | 30 (2.1)                      | 71 (2.9)                | 0.169   |
| Emergency [n (%)]                            | 1641 (92.1)             | 1284 (93.0)                   | 2229 (93.7)             | 0.138   |
| <b>ICU type</b>                              |                         |                               |                         |         |
| MICU [n (%)]                                 | 953 (53.5)              | 727 (52.6)                    | 1362 (57.2)             | 0.008   |
| CCU/CSRU [n (%)]                             | 413 (23.2)              | 323 (23.4)                    | 453 (19.0)              | 0.001   |
| TSICU/SICU [n (%)]                           | 414 (23.2)              | 330 (23.9)                    | 562 (23.6)              | 0.908   |
| <b>Vasopressors</b>                          |                         |                               |                         |         |
| Norepinephrine [n (%)]                       | 566 (31.7)              | 374 (27.1)                    | 711 (29.9)              | 0.016   |
| Dopamine [n (%)]                             | 198 (11.1)              | 151 (10.9)                    | 256 (10.7)              | 0.013   |
| Epinephrine [n (%)]                          | 67 (3.7)                | 28 (2.0)                      | 37 (1.5)                | < 0.001 |
| Vasopressin [n (%)]                          | 156 (8.7)               | 88 (6.3)                      | 172 (7.2)               | 0.033   |
| Overall vasopressor use                      | 701 (39.3)              | 482 (34.9)                    | 858 (36.1)              | 0.022   |
| <b>Fluid input/output</b>                    |                         |                               |                         |         |
| Fluid intake (ml/kg/48hr)                    | 99.9 ± 60.9             | 90.7 ± 57.6                   | 97.2 ± 61.2             | < 0.001 |
| Urine output (ml/kg/48hr)                    | 42.0 ± 32.0             | 42.9 ± 30.3                   | 41.9 ± 29.5             | 0.5659  |
| Fluid balance (ml/kg/48hr)                   | 46.7 ± 59.4             | 38.3 ± 55.1                   | 46.0 ± 60.4             | < 0.001 |
| <b>Infection site</b>                        |                         |                               |                         |         |
| Respiratory infection                        | 1048 (58.8)             | 929 (67.3)                    | 1580 (66.4)             | < 0.001 |
| Blood infection                              | 768 (43.1)              | 509 (36.8)                    | 998 (41.9)              | 0.001   |
| Urinary infection                            | 549 (30.8)              | 409 (29.6)                    | 682 (28.6)              | 0.323   |
| Abdominal infection                          | 245 (13.7)              | 159 (11.5)                    | 334 (14.0)              | 0.072   |
| Cerebral infection                           | 153 (8.5)               | 106 (7.6)                     | 169 (7.1)               | 0.206   |
| <b>Disease severity scores</b>               |                         |                               |                         |         |
| SOFA on ICU admission<br>median (IQR)        | 6 (4–9)                 | 5 (4–8)                       | 5 (3–7)                 | < 0.001 |
| Maximum SOFA during ICU stay<br>median (IQR) | 10 (7–14)               | 9 (7–12)                      | 9 (7–12)                | < 0.001 |
| <b>Laboratory outcomes</b>                   |                         |                               |                         |         |
| Maximum serum creatinine (mg/L)              | 2.5 ± 2.7               | 2.2 ± 2.1                     | 2.1 ± 1.9               | < 0.001 |
| Minimum hemoglobin level (g/dl)              | 8.3 ± 1.7               | 8.69 ± 1.7                    | 8.4 ± 1.6               | < 0.001 |
| Maximum serum sodium (mmol/L)                | 145.1 ± 5.4             | 145.0 ± 5.2                   | 144.6 ± 5.1             | 0.009   |
| Maximum serum lactate (mmol/L)               | 4.1 ± 3.8 (n=1536)      | 3.4 ± 3.1 (n=1174)            | 3.1 ± 3.0 (n=2112)      | < 0.001 |
| Platelet count (10 <sup>9</sup> /L)          | 146.7 ± 88.0            | 225.1 ± 107.2                 | 297.5 ± 163.4           | < 0.001 |
| Lymphocyte count (10 <sup>9</sup> /L)        | 2.1 ± 5.7               | 1.1 ± 0.5                     | 0.68 ± 0.4              | < 0.001 |

|                                   |             |              |               |         |
|-----------------------------------|-------------|--------------|---------------|---------|
| <b>PLR</b>                        | 91.8 ± 37.1 | 195.8 ± 28.6 | 557.5 ± 484.8 | < 0.001 |
| <b>Clinical outcomes</b>          |             |              |               |         |
| <b>ICU LOS</b>                    | 9.9 ± 10.1  | 9.3 ± 8.7    | 10.1 ± 9.9    | 0.071   |
| <b>Hospital LOS</b>               | 17.7 ± 15.1 | 16.6 ± 13.5  | 17.2 ± 13.7   | 0.082   |
| <b>AKI [n (%)]</b>                | 861 (48.3)  | 601 (43.5)   | 1080 (45.4)   | 0.022   |
| <b>Hospital mortality [n (%)]</b> | 475 (26.6)  | 291 (21.0)   | 621 (26.1)    | < 0.001 |

Abbreviations:

PLR: platelet to lymphocyte ratio; BMI body mass index; MICU, multiple intensive care unit; CCU, coronary care unit; CSRU, cardiac surgery care unit; TSICU, traumatic surgical intensive care unit; SICU, surgical intensive care unit; SOFA, sequential organ failure assessment; SAPS II, Simplified Acute Physiology Score II; IQR, interquartile range; LOS length of stay; AKI, acute kidney injury.

For peer review only

Table 2 multivariable logistic regressions of PLR using linear spline function

| Variables                          | Crude Odds ratio | 95% CI          | p       | Adjusted Odds ratio | 95% CI          | p       |
|------------------------------------|------------------|-----------------|---------|---------------------|-----------------|---------|
| <b>PLR (<math>\leq 200</math>)</b> | 0.997            | 0.996 – 0.998   | < 0.001 | 0.9993              | 0.9980 – 1.0006 | 0.319   |
| <b>PLR (<math>&gt; 200</math>)</b> | 1.0002           | 1.0001 – 1.0004 | 0.001   | 1.0002              | 1.0000 – 1.0003 | 0.025   |
| <b>Age (<math>&gt; 65</math>)</b>  | 1.77             | 1.56 – 2.11     | < 0.001 | 2.32                | 1.99 – 2.64     | < 0.001 |
| <b>Maximum SOFA</b>                | 1.20             | 1.18 – 1.22     | < 0.001 | 1.18                | 1.16 – 1.20     | < 0.001 |
| <b>Urinary infection</b>           | 0.66             | 0.57 – 0.76     | < 0.001 | 0.65                | 0.56 – 0.76     | < 0.001 |
| <b>Respiratory infection</b>       | 1.29             | 1.13 – 1.47     | < 0.001 | 1.25                | 1.09 – 1.45     | 0.002   |
| <b>Blood infection</b>             | 2.14             | 1.89 – 2.42     | < 0.001 | 1.49                | 1.29 – 1.71     | < 0.001 |
| <b>Fluid balance (ml/kg/48hrs)</b> | 1.006            | 1.005 – 1.007   | < 0.001 | 1.002               | 1.0008 – 1.0031 | 0.001   |
| <b>MICU</b>                        | 1.34             | 1.15 – 1.56     | < 0.001 | 1.15                | 0.97 – 1.37     | 0.089   |
| <b>CCU/CSRU</b>                    | 1.22             | 1.01 – 1.47     | 0.032   | 1.03                | 0.84 – 1.26     | 0.752   |

Note: The mean variance inflation factor was 2.89 and p value of goodness of fit was 0.632.

Abbreviation: PLR platelet to lymphocyte ratio; CI confidence interval; SOFA sequential organ failure assessment; MICU multiple intensive care unit; CCU coronary care unit; CSRU cardiac surgery care unit.

1  
2  
3  
4  
5  
6  
7  
8  
9  
10  
11  
12  
13  
14  
15  
16  
17  
18  
19  
20  
21  
22  
23  
24  
25  
26  
27  
28  
29  
30  
31  
32  
33  
34  
35  
36  
37  
38  
39  
40  
41  
42  
43  
44  
45  
46  
47

Table 3 Association between three PLR levels and hospital mortality

|                | PLR ≤ 150          |         | 150 < PLR ≤ 250 |   | PLR > 250          |       |
|----------------|--------------------|---------|-----------------|---|--------------------|-------|
|                | OR (95% CI)        | p       | OR (95% CI)     | p | OR (95% CI)        | p     |
| <b>Model 1</b> | 1.41 (1.19 – 1.67) | < 0.001 | Ref.            | – | 1.28 (1.09 – 1.51) | 0.002 |
| <b>Model 2</b> | 1.34 (1.13 – 1.59) | 0.001   | Ref.            | – | 1.23 (1.05 – 1.45) | 0.009 |
| <b>Model 3</b> | 1.35 (1.14 – 1.61) | 0.001   | Ref.            | – | 1.21 (1.03 – 1.43) | 0.018 |
| <b>Model 4</b> | 1.15 (0.96 – 1.38) | 0.123   | Ref.            | – | 1.29 (1.09 – 1.53) | 0.003 |

Adjusted covariates: Model 1 = age, admitted ICU type. Model 2 = Model 1+ (fluid balance at 48 hours after ICU admission). Model 3= Model 2 + (infection sites). Model 4 = Model 3+ (Maximum SOFA score during ICU stay).

Abbreviations: PLR platelet to lymphocyte ratio; OR = odds ratio; CI= confidence interval; Ref reference category.

1  
2  
3  
4  
5  
6  
7  
8  
9  
10 **Figure legend:**

11  
12 Figure 1: The crude and adjusted odds ratios in the subgroup analysis. PLR level 2 was used as the reference level in all the logistic models.

13  
14 Abbreviations: PLR, platelet-to-lymphocyte ratio; AKI, acute kidney injury; SOFA, Sequential Organ Failure Assessment; CI, confidence interval  
15  
16  
17  
18  
19  
20  
21  
22  
23  
24  
25  
26  
27  
28  
29  
30  
31  
32  
33  
34  
35  
36  
37  
38  
39  
40  
41  
42  
43  
44  
45  
46  
47



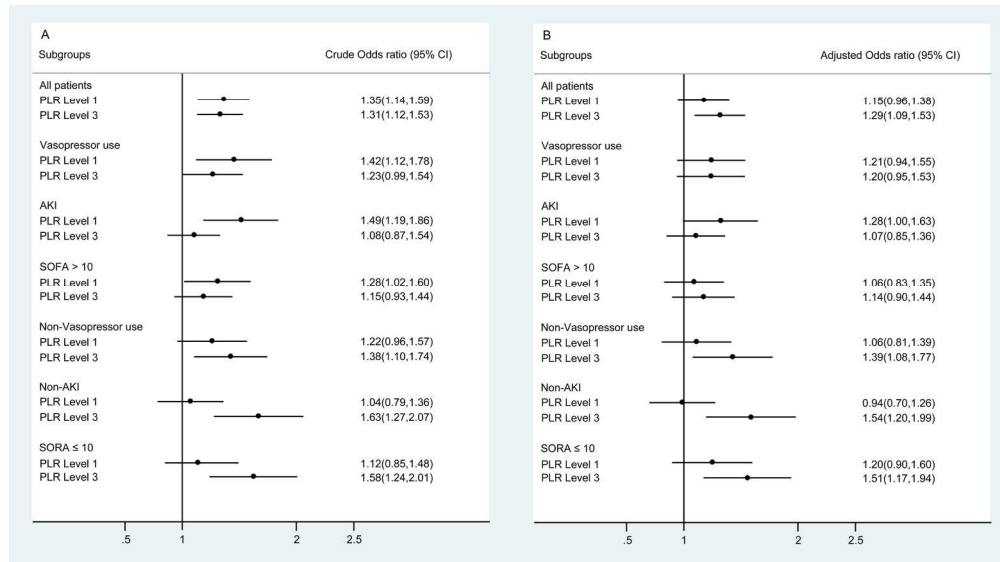

Figure 1: The crude and adjusted odds ratios in the subgroup analysis. PLR level 2 was used as the reference level in all the logistic models.

182x102mm (300 x 300 DPI)

Table S1 Adjusted odds ratio of hospital mortality using PLR as design variable in multivariable logistic regression

| Variables                   | Odds ratio | 95% CI          | p         |
|-----------------------------|------------|-----------------|-----------|
| PLR Level 1 ( $\leq 150$ )  | 1.15       | 0.96 – 1.38     | 0.123     |
| PLR Level 2 (151 ~ 250)     | Ref.       | –               | –         |
| PLR Level 3 ( $> 250$ )     | 1.29       | 1.09 – 1.53     | 0.003     |
| Age ( $> 65$ )              | 2.27       | 1.97 – 2.62     | $< 0.001$ |
| Maximum SOFA                | 1.19       | 1.16 – 1.21     | $< 0.001$ |
| Urinary infection           | 0.65       | 0.56 – 0.76     | $< 0.001$ |
| Respiratory infection       | 1.25       | 1.08 – 1.44     | 0.002     |
| Blood infection             | 1.49       | 1.29 – 1.71     | $< 0.001$ |
| Fluid balance (ml/kg/48hrs) | 1.002      | 1.0008 – 1.0031 | 0.001     |
| MICU                        | 1.16       | 0.98 – 1.37     | 0.082     |
| CCU/CSRU                    | 1.04       | 0.84 – 1.27     | 0.700     |

Note: The mean variance inflation factor (VIF) was 2.53 and p value of goodness of fit was 0.665.

Abbreviation: PLR platelet to lymphocyte ratio; CI confidence interval; SOFA sequential organ failure assessment; MICU multiple intensive care unit; CCU coronary care unit; CSRU cardiac surgery care unit.

Table S2 Comparisons of subgroups according to the existence of vasopressor use, AKI and SOFA score

| Variables                             | Vasopressor-use<br>(n = 2554) | Non-Vasopressor-use<br>(n = 2983) | p       | AKI<br>(n = 2542) | Non-AKI<br>(n = 2995) | p       | SOFA > 10<br>(n = 2390) | SOFA ≤ 10<br>(n = 2147) | p       |
|---------------------------------------|-------------------------------|-----------------------------------|---------|-------------------|-----------------------|---------|-------------------------|-------------------------|---------|
| age                                   | 66.3 ± 15.2                   | 63.6 ± 16.8                       | < 0.001 | 65.1 ± 15.4       | 64.6 ± 16.8           | 0.211   | 64.0 ± 15.7             | 65.5 ± 16.4             | < 0.001 |
| Vasopressor-use [n (%)]               | -                             | -                                 | -       | 1321              | 1233                  | < 0.001 | 1554                    | 1000                    | < 0.001 |
| Fluid intake (ml/kg/48hr)             | 114.4 ± 661.                  | 81.1 ± 50.0                       | < 0.001 | 94.3 ± 62.0       | 98.3 ± 58.8           | 0.013   | 110.7 ± 65.5            | 85.6 ± 53.6             | < 0.001 |
| Fluid balance (ml/kg/48hr)            | 63.2 ± 64.1                   | 28.1 ± 48.5                       | < 0.001 | 48.4 ± 60.9       | 40.8 ± 56.9           | < 0.001 | 62.0 ± 64.1             | 30.8 ± 50.6             | < 0.001 |
| Maximum SOFA median (IQR)             | 12 (9 – 14)                   | 8 (6 – 11)                        | < 0.001 | 11 (8 – 14)       | 9 (7 – 11)            | < 0.001 | 13 (12 – 15)            | 7 (6 – 9)               | < 0.001 |
| Platelet count (10 <sup>9</sup> /L)   | 225.0 ± 240.1                 | 236.0 ± 148.7                     | 0.005   | 219.2 ± 143.4     | 240.9 ± 145.5         | < 0.001 | 208.4 ± 147.1           | 248.1 ± 140.8           | < 0.001 |
| Lymphocyte count (10 <sup>9</sup> /L) | 1.26 ± 3.32                   | 1.28 ± 3.32                       | 0.890   | 1.21 ± 2.21       | 1.32 ± 4.03           | 0.246   | 1.24 ± 3.42             | 1.29 ± 3.24             | 0.529   |
| Hospital LOS                          | 17.8 ± 14.3                   | 16.7 ± 14.1                       | 0.002   | 19.7 ± 15.6       | 15.1 ± 12.3           | < 0.001 | 19.6 ± 14.6             | 15.5 ± 13.4             | < 0.001 |
| AKI [n (%)]                           | 1321                          | 1221                              | < 0.001 | -                 | -                     | -       | 1360                    | 1182                    | < 0.001 |
| Hospital mortality [n (%)]            | 777                           | 612                               | < 0.001 | 875               | 514                   | < 0.001 | 884                     | 505                     | < 0.001 |

Abbreviation: SOFA sequential organ failure assessment; IQR interquartile range; LOS length of stay; AKI acute kidney injury.

Figure S1 Crude relationship between hospital mortality and PLR

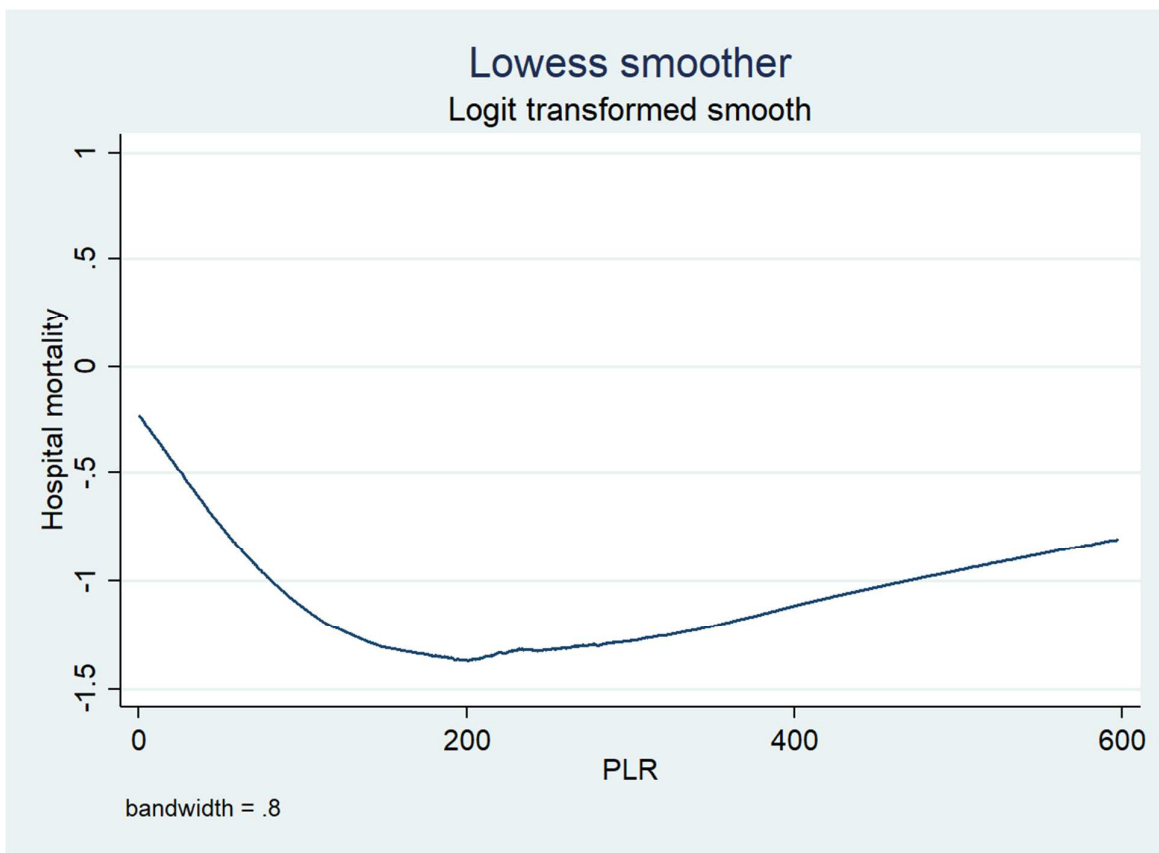

view only

**STROBE 2007 (v4) Statement—Checklist of items that should be included in reports of cohort studies**

| Section/Topic             | Item # | Recommendation                                                                                                                                                                       | Reported on page # |
|---------------------------|--------|--------------------------------------------------------------------------------------------------------------------------------------------------------------------------------------|--------------------|
| Title and abstract        | 1      | (a) Indicate the study’s design with a commonly used term in the title or the abstract                                                                                               | 1                  |
|                           |        | (b) Provide in the abstract an informative and balanced summary of what was done and what was found                                                                                  | 2                  |
| <b>Introduction</b>       |        |                                                                                                                                                                                      |                    |
| Background/rationale      | 2      | Explain the scientific background and rationale for the investigation being reported                                                                                                 | 4                  |
| Objectives                | 3      | State specific objectives, including any prespecified hypotheses                                                                                                                     | 4                  |
| <b>Methods</b>            |        |                                                                                                                                                                                      |                    |
| Study design              | 4      | Present key elements of study design early in the paper                                                                                                                              | 5-6                |
| Setting                   | 5      | Describe the setting, locations, and relevant dates, including periods of recruitment, exposure, follow-up, and data collection                                                      | 5-7                |
| Participants              | 6      | (a) Give the eligibility criteria, and the sources and methods of selection of participants. Describe methods of follow-up                                                           | 5                  |
|                           |        | (b) For matched studies, give matching criteria and number of exposed and unexposed                                                                                                  |                    |
| Variables                 | 7      | Clearly define all outcomes, exposures, predictors, potential confounders, and effect modifiers. Give diagnostic criteria, if applicable                                             | 6                  |
| Data sources/ measurement | 8*     | For each variable of interest, give sources of data and details of methods of assessment (measurement). Describe comparability of assessment methods if there is more than one group | 4                  |
| Bias                      | 9      | Describe any efforts to address potential sources of bias                                                                                                                            | 7                  |
| Study size                | 10     | Explain how the study size was arrived at                                                                                                                                            | 4                  |
| Quantitative variables    | 11     | Explain how quantitative variables were handled in the analyses. If applicable, describe which groupings were chosen and why                                                         | 6-7                |
| Statistical methods       | 12     | (a) Describe all statistical methods, including those used to control for confounding                                                                                                | 7-8                |
|                           |        | (b) Describe any methods used to examine subgroups and interactions                                                                                                                  | 7-8                |
|                           |        | (c) Explain how missing data were addressed                                                                                                                                          | 7                  |
|                           |        | (d) If applicable, explain how loss to follow-up was addressed                                                                                                                       | N/A.               |
|                           |        | (e) Describe any sensitivity analyses                                                                                                                                                | N/A.               |
| <b>Results</b>            |        |                                                                                                                                                                                      |                    |

|                          |     |                                                                                                                                                                                                              |      |
|--------------------------|-----|--------------------------------------------------------------------------------------------------------------------------------------------------------------------------------------------------------------|------|
| Participants             | 13* | (a) Report numbers of individuals at each stage of study—eg numbers potentially eligible, examined for eligibility, confirmed eligible, included in the study, completing follow-up, and analysed            | 8    |
|                          |     | (b) Give reasons for non-participation at each stage                                                                                                                                                         | N/A. |
|                          |     | (c) Consider use of a flow diagram                                                                                                                                                                           | N/A. |
| Descriptive data         | 14* | (a) Give characteristics of study participants (eg demographic, clinical, social) and information on exposures and potential confounders                                                                     | 8    |
|                          |     | (b) Indicate number of participants with missing data for each variable of interest                                                                                                                          | 7    |
|                          |     | (c) Summarise follow-up time (eg, average and total amount)                                                                                                                                                  | N/A. |
| Outcome data             | 15* | Report numbers of outcome events or summary measures over time                                                                                                                                               | 9    |
| Main results             | 16  | (a) Give unadjusted estimates and, if applicable, confounder-adjusted estimates and their precision (eg, 95% confidence interval). Make clear which confounders were adjusted for and why they were included | 7    |
|                          |     | (b) Report category boundaries when continuous variables were categorized                                                                                                                                    | 7    |
|                          |     | (c) If relevant, consider translating estimates of relative risk into absolute risk for a meaningful time period                                                                                             | N/A. |
| Other analyses           | 17  | Report other analyses done—eg analyses of subgroups and interactions, and sensitivity analyses                                                                                                               | 7    |
| <b>Discussion</b>        |     |                                                                                                                                                                                                              |      |
| Key results              | 18  | Summarise key results with reference to study objectives                                                                                                                                                     | 10   |
| <b>Limitations</b>       |     |                                                                                                                                                                                                              |      |
| Interpretation           | 20  | Give a cautious overall interpretation of results considering objectives, limitations, multiplicity of analyses, results from similar studies, and other relevant evidence                                   | 14   |
| Generalisability         | 21  | Discuss the generalisability (external validity) of the study results                                                                                                                                        | N/A. |
| <b>Other information</b> |     |                                                                                                                                                                                                              |      |
| Funding                  | 22  | Give the source of funding and the role of the funders for the present study and, if applicable, for the original study on which the present article is based                                                | 15   |

\*Give information separately for cases and controls in case-control studies and, if applicable, for exposed and unexposed groups in cohort and cross-sectional studies.

**Note:** An Explanation and Elaboration article discusses each checklist item and gives methodological background and published examples of transparent reporting. The STROBE checklist is best used in conjunction with this article (freely available on the Web sites of PLoS Medicine at <http://www.plosmedicine.org/>, Annals of Internal Medicine at <http://www.annals.org/>, and Epidemiology at <http://www.epidem.com/>). Information on the STROBE Initiative is available at [www.strobe-statement.org](http://www.strobe-statement.org).

# BMJ Open

## A retrospective study of platelet-to-lymphocyte ratio as a prognostic predictor of mortality for sepsis: interaction effect with disease severity

|                                    |                                                                                                                                                                                             |
|------------------------------------|---------------------------------------------------------------------------------------------------------------------------------------------------------------------------------------------|
| Journal:                           | <i>BMJ Open</i>                                                                                                                                                                             |
| Manuscript ID                      | bmjopen-2018-022896.R1                                                                                                                                                                      |
| Article Type:                      | Research                                                                                                                                                                                    |
| Date Submitted by the Author:      | 11-May-2018                                                                                                                                                                                 |
| Complete List of Authors:          | Shen, Yanfei; Intensive Care Unit<br>Huang, Xinmei; Jinhua TCM hospital, Department of otolaryngological<br>Zhang, Weimin; Department of Intensive Care Unit, Dongyang People's<br>Hospital |
| <b>Primary Subject<br>Heading</b>: | Intensive care                                                                                                                                                                              |
| Secondary Subject Heading:         | Intensive care, Infectious diseases                                                                                                                                                         |
| Keywords:                          | sepsis, PLR, mortality, MIMIC III                                                                                                                                                           |
|                                    |                                                                                                                                                                                             |

SCHOLARONE™  
Manuscripts

1  
2  
3 **A retrospective study of platelet-to-lymphocyte ratio as a prognostic predictor**  
4  
5  
6 **of mortality for sepsis: interaction effect with disease severity**  
7  
8  
9

10 **Author names:** Yanfei Shen<sup>1\*</sup>, Xinmei Huang<sup>2#</sup>, Weimin Zhang<sup>1</sup>  
11  
12

13  
14  
15 **Affiliations:**  
16

17  
18 <sup>1</sup> Department of Intensive Care Unit, Dongyang People's Hospital, No. 60, Wuning  
19  
20 West Road, Dongyang, Zhejiang, 322100, P.R. China  
21

22  
23 <sup>2</sup> Department of Otolaryngology, Jinhua TCM hospital, No. 439, Shuangxi West  
24  
25 Road, Jinhua, Zhejiang, 322100, P.R. China  
26  
27

28  
29  
30 # Author Xinmei Huang contributed equally to this study and is listed as co-first  
31  
32 author  
33  
34

35  
36  
37  
38 \* **Corresponding author:** Yanfei Shen  
39

40 E-mail: snow.shen@hotmail.com  
41

42 Phone: +86-137-3890-3218  
43  
44

45  
46  
47 Word count: 2955  
48  
49  
50  
51  
52  
53  
54  
55  
56  
57  
58  
59  
60



## Abstract

**Objective:** The role of platelet-to-lymphocyte ratio (PLR) as an indicator of inflammation has received recent scientific attention. We aimed to investigate the prognostic value of PLR for sepsis.

**Design:** Retrospective cohort study.

**Setting and Participants:** Data were extracted from the Medical Information Mart for Intensive Care III database. Data of 5,537 patients with sepsis were analyzed.

**Methods:** Logistic regression was used to explore the association between PLR and hospital mortality. Subgroup analyses were performed based on vasopressor use, acute kidney injury (AKI), and a Sequential Organ Failure Assessment (SOFA) score > 10.

**Results:** In the logistic model with linear spline function, a PLR > 200 was significantly associated with mortality (odds ratio [OR], 1.0002; 95% confidence interval [CI], 1.0001 – 1.0003); the association was non-significant for PLRs ≤ 200 (OR, 0.999; 95% CI, 0.998 – 1.001). In the logistic model using the PLR as a design variable, only high PLRs were significantly associated with mortality (OR, 1.29; 95% CI, 1.09 – 1.53). The association between mortality and low PLRs was non-significant (OR, 1.15; 95% CI, 0.96 – 1.38). In the subgroups with vasopressor use, AKI, and a SOFA score > 10, the association between high PLR and mortality was non-significant; this remained significant in the subgroups without vasopressor use (OR, 1.39; 95% CI, 1.08 – 1.77) or AKI (OR, 1.54; 95% CI, 1.20 – 1.99), and with a SOFA score ≤ 10 (OR, 1.51; 95% CI, 1.17 – 1.94).

1  
2  
3 **Conclusions:** High PLRs at admission were associated with an increased risk of  
4 mortality. In patients with vasopressor use, AKI, or a SOFA score > 10, this  
5  
6 association was non-significant.  
7  
8  
9

10  
11  
12  
13 **Keywords:** Sepsis, PLR, mortality, MIMIC III  
14  
15

16  
17  
18 **Strengths and limitations of this study:**

- 19  
20
  - The large sample size facilitated a robust conclusion.
  - Subgroup analysis was performed to investigate the interaction between  
21 disease severity and platelet-to-lymphocyte ratio.  
22
  - Pre-ICU data were not available in this database, which may lead to bias.  
23
  - Patients with septic shock could not be identified in this database.  
24

25  
26  
27  
28  
29  
30  
31  
32  
33  
34  
35  
36  
37  
38  
39  
40  
41  
42  
43  
44  
45  
46  
47  
48  
49  
50  
51  
52  
53  
54  
55  
56  
57  
58  
59  
60

## INTRODUCTION

Sepsis is a major cause of morbidity and mortality worldwide, and it results from a dysregulation of the systemic inflammatory response to infection.<sup>1,2</sup> Despite significant advances in the pathophysiology and therapeutic strategies for sepsis, the mortality remains high,<sup>3</sup> at 300 deaths per 100,000 people.<sup>4</sup> An extremely complex systemic expression of inflammatory and anti-inflammatory response plays a critical role in the pathophysiological process of sepsis, which is strongly associated with an increased risk of mortality.<sup>5</sup> Identifying patients in the early stage of sepsis who are at a high risk of poor outcomes is vital for timely and adequate intervention.<sup>6</sup> While a significant amount of effort has been put into investigating promising biomarkers, the challenge of identifying these at-risk patients remains.<sup>7</sup>

In recent years, studies have reported that platelets and lymphocytes play critical roles in the inflammatory process. Therefore, the platelet-to-lymphocyte ratio (PLR)—a novel inflammatory factor—has received recent research attention, as it may act as an indicator of inflammation<sup>8</sup> in a wide spectrum of diseases, such as myocardial infarction,<sup>9</sup> acute kidney injury (AKI),<sup>10</sup> hepatocellular carcinoma,<sup>11</sup> and non-small cell lung cancer.<sup>12</sup>

Based on the findings of previous studies, it is reasonable to speculate the presence of a potential relationship between PLR and mortality for sepsis. However, no investigation has been conducted.

## MATERIALS AND METHODS

### Database introduction

All data in the current study were extracted from an online international database, “Medical Information Mart for Intensive Care III (MIMIC III),” published by the Massachusetts Institute of Technology, with approval from the review boards of the Massachusetts Institute of Technology and Beth Israel Deaconess Medical Center. All patient information in the database was de-identified for privacy protection, and the need for informed consent was waived. This database included more than 58,000 patients who were admitted to the intensive care unit (ICU) of the Beth Israel Deaconess Medical Center from 2001 to 2012. The corresponding author obtained access to this database (certification number: 1564657), and was responsible for data extraction.

### Inclusion and exclusion criteria

Adult patients meeting the criteria for sepsis were initially screened. The definition of sepsis was adapted from the recommendation in the Surviving Sepsis Campaign 2016.<sup>13</sup> Accordingly, sepsis was defined as the presence of a Sequential Organ Failure Assessment (SOFA) score  $\geq 2$  within 24 hours after ICU admission, accompanied by at least one infection site. The following criteria were used to exclude patients from this analysis: 1) age lower than 18 years; 2) having spent less than 48 hours in the ICU, and 3) absence of data on the serum platelet and lymphocyte counts within 24 hours after ICU admission. For patients who were admitted to the ICU more than once, only the first ICU stay was considered in this study.

### Data extraction

Data on patient demographic characteristics, laboratory outcomes, infection sites, vasopressor use, and disease severity score were extracted from the database. Only patients with data on the serum platelet and lymphocyte counts within the first 24 hours after ICU admission were included. The first blood sample after ICU admission was used to calculate the PLR, which was defined as the ratio of the absolute platelet count and absolute lymphocyte count. Septic shock was considered as a special subgroup of sepsis. However, it was difficult to identify patients with septic shock in this database due to a lack of relevant information. Thus, data on vasopressor use were extracted for the subgroup analysis. Vasopressor use was defined as the use of any vasopressor agent, including norepinephrine, epinephrine, dobutamine, dopamine, or vasopressin, within 48 hours after ICU admission.

### Outcome definition

The primary endpoint was hospital mortality, which was defined as death during hospitalization. The presence of AKI was defined according to the Creatinine-based Kidney Disease Improving Global Outcome criteria without urine output.<sup>14 15</sup> A 1.5-fold increase in the serum creatinine (SCr) level during the ICU stay, relative to the level at the baseline, was considered to indicate the presence of AKI. In the present cohort, data on the baseline SCr values were missing in 20.3% of the cases. For patients without previous SCr data, the estimated baseline SCr was calculated using the following formula:<sup>16</sup>  $SCr = 0.74 - 0.2 \text{ (if female)} + 0.08 \text{ (if black)} + 0.0039 * \text{age (in years)}$ .

### **Management of missing data**

Variables with missing data are common in the MIMIC III database, as it comprises more than 58,000 admissions. Variables with more than 20% of missing values were excluded from our analysis; these included serum albumin and lactate. For non-normal distribution variables with less than 5% of missing values, such as age and fluid balance, we replaced the missing values with the mean values, and for non-normal distribution parameters, missing values were replaced by the respective median, instead of using the multiple imputation technique. For dichotomous variables with less than 5% of missing values, the missing values were not imputed.

### **Patient and public involvement**

No patient was involved in any part of this study.

### **Statistical analysis**

Continuous variables were expressed as mean  $\pm$  standard deviation or median (interquartile range), as appropriate. A Student's t test, analysis of variance, Wilcoxon rank-sum test, or Kruskal–Wallis test was used, as appropriate. Categorical data were expressed as proportions, and compared using the  $\chi^2$  test. A knot of PLR (at a level of around 200, Supplementary Figure S1) was detected using the LOWESS smoother technique; thus, the linear spline function was initially used in the multivariate logistic regression. Thereafter, all patients were further divided into three levels: those with a PLR  $\leq$  150 (level 1), 150 < PLR  $\leq$  250 (level 2), and PLR > 250 (level 3). Variables including demographic characteristics, infection sites, disease severity score, and laboratory measures potentially associated with mortality,

1  
2  
3 or those that had a p value < 0.20 in the univariate analyses, were included in the  
4  
5  
6 multivariate logistic regression analyses. An extended model approach was used for  
7  
8 covariate adjustment: Model 1 = adjusted for age, admitted ICU type. Model 2 =  
9  
10 Model 1 + (fluid balance at 48 hours after ICU admission). Model 3 = Model 2 +  
11  
12 (infection sites). Model 4 = Model 3 + (Maximum SOFA score during the ICU stay).  
13  
14  
15 As we detected a U-shaped association between PLR and mortality, we did not  
16  
17 introduce interaction items (such as PLR multiplied with other variables) in the  
18  
19 logistic models. Instead, subgroup analyses were performed, according to the  
20  
21 presence of AKI and vasopressor use and the median SOFA score. Multi-collinearity  
22  
23 was tested using the variance inflation factor (VIF) method, with a VIF  $\geq 5$  indicating  
24  
25 the presence of multi-collinearity. All logistic regression models underwent a  
26  
27 goodness of fit test. A two-tailed test was performed, and  $p < 0.05$  was considered  
28  
29 statistically significant. All statistical analyses were performed using STATA 11.2  
30  
31 (StataCorp, LLC, College Station, TX, USA).  
32  
33  
34  
35  
36  
37  
38  
39

## 40 RESULTS

### 41 Baseline characteristics

42  
43 Data on a total of 5,537 sepsis patients were included in this analysis. The overall  
44  
45 mortality observed was 25.1%. Data on the comparisons of the baseline  
46  
47 characteristics between the three PLR levels are listed in Table 1. The mean age at  
48  
49 admission was 64.9 years, and 44.9% of the participants were male. The rate of  
50  
51 vasopressor use (701/1780 vs. 482/1380,  $p = 0.01$ ), and a maximum SOFA score  
52  
53  
54  
55  
56  
57  
58  
59  
60

1  
2  
3 (10 (7–14) vs. 9 (7 – 12),  $p < 0.001$ ) were significantly higher in PLR level 1 than in  
4  
5  
6 level 2; the presence of these variables was non-significant in level 3. The mortality  
7  
8 was significantly higher both in the level 1 group (475/1780 vs. 291/1380,  $p < 0.001$ )  
9  
10 and the level 3 group (621/2377 vs. 291/1380,  $p = 0.001$ ).  
11  
12

### 13 **Association between PLR and hospital mortality**

14  
15 The PLR was initially used as a continuous variable in the logistic model, using linear  
16  
17 spline function, as shown in Table 2. We observed that, for PLRs  $\leq 200$ , the odds  
18  
19 ratio (OR) of mortality was non-significant (OR, 0.999; 95% confidence interval [CI],  
20  
21 0.998 – 1.001), while the OR for PLRs  $> 200$  was significant after adjustment for  
22  
23 covariates, including the SOFA score (OR, 1.0002; 95% CI, 1.0001 – 1.0003). In the  
24  
25 extended multiple logistic regression analysis (Table 3), both low and high PLR  
26  
27 levels were significantly associated with increased hospital mortality, in model 1 (OR,  
28  
29 1.41; 95% CI, 1.19 – 1.67 and OR, 1.28; 95% CI, 1.09 – 1.51, respectively), model 2  
30  
31 (OR, 1.34; 95% CI, 1.13 – 1.59 and OR, 1.23; 95% CI, 1.05 – 1.45, respectively) and  
32  
33 model 3 (OR, 1.35; 95% CI, 1.14 – 1.61 and OR, 1.21; 95% CI, 1.03 – 1.43,  
34  
35 respectively). However, after adjustment for the maximum SOFA score in model 4,  
36  
37 the OR for low PLR levels became non-significant (OR, 1.15; 95% CI, 0.96 – 1.38,  $p$   
38  
39 = 0.123), while the OR for high PLR levels remained significant (OR, 1.29; 95% CI,  
40  
41 1.09 – 1.53,  $p = 0.003$ ). The univariate results are presented in Supplementary Table  
42  
43 S1 and the ORs of the covariates in model 4 are listed in Supplementary Table S2.  
44  
45  
46  
47  
48  
49  
50  
51

### 52 **Subgroup analysis**

53  
54 As the association between PLR and mortality was largely confounded by the SOFA  
55  
56  
57  
58  
59  
60



1  
2  
3 score (Table 3), we suspected that there was an interaction effect between disease  
4 severity and PLR level. Thus, we performed a subgroup analysis according to the  
5  
6 existence of vasopressor use and AKI, and the median SOFA score (> 10 points), as  
7  
8 shown in Figure 1. Unlike previous findings, the association between high PLRs and  
9  
10 mortality became non-significant in the subgroups with vasopressor use (OR, 1.20;  
11  
12 95% CI, 0.95 – 1.53), AKI (OR, 1.07; 95% CI, 0.85 – 1.36), and a SOFA score > 10  
13  
14 (OR, 1.14; 95% CI, 0.90 – 1.44), and remained significant in the subgroups without  
15  
16 vasopressor use (OR, 1.39; 95% CI, 1.08 – 1.77) and AKI (OR, 1.54; 95% CI, 1.20 –  
17  
18 1.99), and with a SOFA score  $\leq$  10 (OR, 1.51; 95% CI, 1.17 – 1.94). In the case of  
19  
20 lower PLRs, the OR of mortality was non-significant in all subgroups, after  
21  
22 adjustment, except for the subgroup with AKI. Data on the comparisons of the  
23  
24 characteristics between these subgroups are listed in Supplementary Table S3.  
25  
26  
27  
28  
29  
30  
31  
32  
33  
34

## 35 DISCUSSION

36  
37 In this study, we observed a crude U-shaped association between the PLR and  
38  
39 hospital mortality in patients with sepsis. However, after adjustment for the disease  
40  
41 severity score, only high PLRs remained significantly associated with increased  
42  
43 mortality; the association with low PLRs became non-significant. Furthermore, in the  
44  
45 subgroup analysis, a significant association between high PLRs and mortality only  
46  
47 existed in the subgroups without vasopressor use and AKI, or those with a SOFA  
48  
49 score  $\leq$  10.  
50  
51  
52  
53

54 Growing evidence indicates that immune dysregulation (especially cellular  
55  
56  
57  
58  
59  
60

1  
2  
3 immunity), including pro-inflammatory or anti-inflammatory responses during  
4  
5 different stages, is common in cases of sepsis.<sup>17</sup> Recent studies have reported that  
6  
7 platelets play an important role in both the immunomodulatory and inflammatory  
8  
9 process,<sup>18 19</sup> by inducing the release of inflammatory cytokines<sup>20</sup> and interacting with  
10  
11 different kinds of bacteria and immune cells, including neutrophils, T-lymphocytes,  
12  
13 NK-cells, and macrophages, which contribute to the initiation or exacerbation of the  
14  
15 inflammatory process.<sup>21</sup> Low lymphocyte counts, which to a certain degree represent  
16  
17 a suppressed immune and inflammatory response,<sup>22 23</sup> have also been reported to  
18  
19 be associated with inflammatory diseases, such as cardiovascular disease<sup>24</sup> and  
20  
21 type II diabetes.<sup>25</sup>  
22  
23  
24  
25  
26  
27

28 Based on these findings, the PLR was suggested as being a novel systematic  
29  
30 inflammatory indicator,<sup>26</sup> and its use was initially reported in the prognostic prediction  
31  
32 of neoplastic disorders, such as hepatocellular carcinoma and breast cancer.  
33  
34 Accumulating evidence suggests that elevated PLRs are strongly associated with  
35  
36 increased systemic inflammation, which may contribute to the progression and  
37  
38 prognoses of many disorders, such as atherosclerosis<sup>27</sup> and diabetes mellitus.<sup>28</sup>  
39  
40  
41  
42

43 In contrast to our findings, Zheng et al.<sup>10</sup> reported that both high and low PLRs  
44  
45 are associated with increased mortality among critically ill patients with AKI, after  
46  
47 adjustment for the disease severity score in the Cox proportional hazards models. In  
48  
49 that study, unlike in ours, a significant association was also observed in patients with  
50  
51 vasopressin use. Several factors may contribute to this inconsistency between the  
52  
53 findings, such as the use of different cohorts, PLR knots, and definitions of  
54  
55  
56  
57  
58  
59  
60

1  
2  
3 vasopressor use. It is worth noting that, as the association between PLRs and  
4  
5  
6 outcomes varies greatly between different cohorts, the inter-heterogeneity within  
7  
8 critically ill patients may also lead to a biased conclusion.  
9

10 Akbas et al. indicated that a high PLR was positively associated with increased  
11  
12 epicardial adipose tissue deposition in diabetes patients;<sup>29</sup> this may be caused by  
13  
14 higher inflammation rates. Wang et al.<sup>30</sup> reviewed 134 patients with lung  
15  
16 adenocarcinoma, and reported that high PLRs (> 150) were independently  
17  
18 associated with shorter disease-free days and lower overall survival rates. Another  
19  
20 study,<sup>31</sup> including 270 patients with hepatocellular carcinoma, found that elevated  
21  
22 PLRs (> 220) were predictors of poor prognoses, while low PLRs (< 248) were  
23  
24 associated with a low tumor, node and metastasis stage, and low surgery incidence  
25  
26 in 695 patients with lung cancer.<sup>32</sup> Despite the fact that the study cohorts used in  
27  
28 those studies were quite different from those used in ours, the reported PLR knots  
29  
30 were quite similar to ours. However, the small sample sizes in those studies limited  
31  
32 the statistical power for further stratification and subgroup analysis of low PLR. In the  
33  
34 current study, we noticed that high PLRs (> 250) were associated with increased  
35  
36 hospital mortality. As higher platelet levels, to a certain extent, are prognostic of  
37  
38 inflammation of a higher severity, and low lymphocyte counts may represent a  
39  
40 suppressed immune and inflammatory response,<sup>22 23</sup> an increase in the PLR may  
41  
42 reflect the degree of the inflammatory and immune response to the infection, which  
43  
44 relates to a poor prognosis.  
45  
46  
47  
48  
49  
50  
51  
52  
53

54 We also detected a non-significant association between low PLRs and mortality  
55  
56  
57

1  
2  
3 from sepsis. This association between low PLRs and outcomes was also reported in  
4  
5  
6 several studies. In a retrospective study<sup>33</sup> including 899 cases of laryngeal cancer,  
7  
8 patients were divided into three PLR categories (low ( $\leq 119.55$ ), moderate ( $> 119.55$   
9  
10 and  $\leq 193.55$ ), and high ( $> 193.55$ )), and only patients with high PLRs experienced  
11  
12 poor outcomes, including malnutrition and more advanced cancer stage; the  
13  
14 association between outcomes and PLR levels were non-significant for those with  
15  
16 low PLRs. Despite the cohort of that study being different from ours, the conclusion  
17  
18 was consistent with that of our study. In the case of sepsis, a low platelet count is  
19  
20 potentially associated with poor outcomes. In a large study including 931 patients  
21  
22 with sepsis, Claushuis et al. reported that patients with a low platelet count at ICU  
23  
24 admission had a higher disease severity score and increased mortality risk.<sup>34</sup>  
25  
26 Furthermore, thrombocytopenia, one of the most common hemostatic disorders in  
27  
28 the case of sepsis and which is related with platelet consumption, was also  
29  
30 associated with higher mortality.<sup>35</sup> However, in the present study, a significant  
31  
32 association between low PLR and mortality was not detected. Further studies are  
33  
34 needed to validate this conclusion.  
35  
36  
37  
38  
39  
40  
41  
42

43 Furthermore, according to the subgroup analysis, the association between high  
44  
45 PLR and mortality became non-significant in the subgroups with vasopressor use,  
46  
47 AKI, or a SOFA score  $> 10$ ; this association remained significant in the other  
48  
49 subgroups. This finding further supported our speculation that there may be an  
50  
51 interaction between PLR and disease severity. To the best of our knowledge, ours is  
52  
53 the first study to report this interaction. However, the underlying mechanism of this  
54  
55  
56  
57  
58  
59  
60

1  
2  
3 interaction remains largely unknown. A critical characteristic of sepsis is fluid  
4 resuscitation, and, in the current study, patients with vasopressor use, AKI, or a  
5 SOFA score > 10, to a certain degree, represented patients with inflammation of a  
6 higher severity, and thus they may have had a stronger need for fluid resuscitation.  
7  
8 We also noticed that the fluid balance within 48 hours after ICU admission was  
9 significantly larger in these subgroups. Whether fluid resuscitation affects the  
10 prognostic value of the PLR needs further investigation.  
11  
12  
13  
14  
15  
16  
17  
18  
19

20 One of the strengths of our study is the large sample size, which enabled us to  
21 adjust for confounding factors and perform subgroup analyses. However, there are  
22 also several limitations to our study. First, the MIMIC III database comprises data on  
23 patients from 2001; since then, the guidelines for sepsis have changed significantly.  
24  
25 The most recent definition of Sepsis 3.0 was used in the current study, and this may  
26 have introduced selection bias despite the fact that most of the basic interventions  
27 (use of fluids, vasopressors, and antimicrobial agents) remained the same.  
28  
29 Furthermore, as a decrease in the platelet count was a part of the SOFA score, using  
30 the definition of sepsis 3.0 might lead to a relatively low mean platelet count and  
31 potential multi-collinearity. This bias cannot be fully avoided. However, the potential  
32 multi-collinearity was verified in all the logistic models. Second, the platelet count  
33 can be affected by many confounders, such as types of malignities, immunological  
34 factors, and types of drugs. However, due to the retrospective nature of this study,  
35 these situations could not be identified in this database. Third, septic shock is a  
36 special subgroup of sepsis. However, patients with septic shock could not be  
37  
38  
39  
40  
41  
42  
43  
44  
45  
46  
47  
48  
49  
50  
51  
52  
53  
54  
55  
56  
57  
58  
59  
60

1  
2  
3 distinguished in this study. Thus, patients were divided into subgroups, according to  
4  
5 the existence of vasopressor use, AKI, or a SOFA score >10, as these may indicate  
6  
7 the presence of a more severe inflammatory response. Fourth, one of the main  
8  
9 hypotheses of our study was the interaction effect between disease severity and  
10  
11 PLR; however, this interaction term was not introduced in the logistic model due to  
12  
13 the U-shaped association between PLR and mortality. Further prospective studies  
14  
15 are needed to verify our hypothesis. Finally, as high PLRs are associated with poor  
16  
17 outcomes in various disorders while low PLRs are not, it is not clear if interventions  
18  
19 aimed at changing the PLR value may improve outcomes.  
20  
21  
22  
23  
24

## 25 **Conclusion**

26  
27 In patients with sepsis, a high PLR was significantly associated with poor survival,  
28  
29 while the association was non-significant for those with a low PLR. However, the  
30  
31 former association became non-significant in patients with more severe conditions,  
32  
33 including those with vasopressor use, AKI, or a SOFA score > 10. Future studies are  
34  
35 needed to verify our hypothesis.  
36  
37  
38  
39  
40  
41

42 **Financial support and sponsorship:** This research received no specific grant from  
43  
44 any funding agency in the public, commercial or not-for-profit sectors.  
45  
46

47 **Ethical approval:** The use of this database was approved by the review boards of  
48  
49 the Massachusetts Institute of Technology and Beth Israel Deaconess Medical  
50  
51 Center. All the patient information in the database has been de-identified for privacy  
52  
53 protection and the need for informed consent was waived.  
54  
55  
56  
57

**Acknowledgments:** None.

**Conflicts of interest:** None.

**Authors' contributions:**

Yanfei Shen: Responsible for data extraction and writing of the manuscript.

Xinmei Huang: Responsible for data analysis.

Weimin Zhang: Responsible for data validation.

**Data sharing statement:** The full data set used in this study is available from the corresponding author at snow.shen@hotmail.com. However, reanalysis of the full data for other use requires approval by the MIMIC III Institute.

## REFERENCES

1. Vincent JL. Emerging therapies for the treatment of sepsis. *Current opinion in anaesthesiology* 2015;28(4):411-6.
2. Cohen J, Vincent JL, Adhikari NK, et al. Sepsis: a roadmap for future research. *The Lancet. Infectious diseases* 2015;15(5):581-614.
3. Angus DC, van der Poll T. Severe sepsis and septic shock. *The New England journal of medicine* 2013;369(9):840-51.
4. Peake SL, Delaney A, Bailey M, et al. Goal-directed resuscitation for patients with early septic shock. *The New England journal of medicine* 2014;371(16):1496-506.
5. Pierrakos C, Vincent JL. Sepsis biomarkers: a review. *Critical care (London, England)* 2010;14(1):R15.
6. Vincent JL, Pereira AJ, Gleeson J, et al. Early management of sepsis. *Clinical and experimental emergency medicine* 2014;1(1):3-7.
7. Hwang YJ, Chung SP, Park YS, et al. Newly designed delta neutrophil index-to-serum albumin ratio prognosis of early mortality in severe sepsis. *The American journal of emergency medicine* 2015;33(11):1577-82.
8. Kutlucan L, Kutlucan A, Basaran B, et al. The predictive effect of initial complete blood count of intensive care unit patients on mortality, length of hospitalization, and nosocomial infections. *European review for medical and pharmacological sciences* 2016;20(8):1467-73.
9. Hudzik B, Szkodzinski J, Korzonek-Szlacheta I, et al. Platelet-to-lymphocyte ratio predicts contrast-induced acute kidney injury in diabetic patients with ST-elevation myocardial infarction. *Biomarkers in medicine* 2017;11(10):847-56.
10. Zheng CF, Liu WY, Zeng FF, et al. Prognostic value of platelet-to-lymphocyte ratios among critically ill patients with acute kidney injury. *Critical care (London, England)* 2017;21(1):238.
11. Zheng J, Cai J, Li H, et al. Neutrophil to Lymphocyte Ratio and Platelet to Lymphocyte Ratio as

- 1  
2  
3 Prognostic Predictors for Hepatocellular Carcinoma Patients with Various Treatments: a  
4 Meta-Analysis and Systematic Review. *Cellular physiology and biochemistry : international*  
5 *journal of experimental cellular physiology, biochemistry, and pharmacology*  
6 2017;44(3):967-81.  
7  
8 12. Toda M, Tsukioka T, Izumi N, et al. Platelet-to-lymphocyte ratio predicts the prognosis of patients  
9 with non-small cell lung cancer treated with surgery and postoperative adjuvant  
10 chemotherapy. *Thoracic cancer* 2017.  
11  
12 13. Singer M, Deutschman CS, Seymour CW, et al. The Third International Consensus Definitions for  
13 Sepsis and Septic Shock (Sepsis-3). *Jama* 2016;315(8):801-10.  
14  
15 14. Kellum JA, Lameire N. Diagnosis, evaluation, and management of acute kidney injury: a KDIGO  
16 summary (Part 1). *Critical care (London, England)* 2013;17(1):204.  
17  
18 15. Lameire N, Kellum JA. Contrast-induced acute kidney injury and renal support for acute kidney  
19 injury: a KDIGO summary (Part 2). *Critical care (London, England)* 2013;17(1):205.  
20  
21 16. Zavada J, Hoste E, Cartin-Ceba R, et al. A comparison of three methods to estimate baseline  
22 creatinine for RIFLE classification. *Nephrology, dialysis, transplantation : official publication*  
23 *of the European Dialysis and Transplant Association - European Renal Association*  
24 2010;25(12):3911-8.  
25  
26 17. Boomer JS, To K, Chang KC, et al. Immunosuppression in patients who die of sepsis and multiple  
27 organ failure. *Jama* 2011;306(23):2594-605.  
28  
29 18. Cho SY, Jeon YL, Kim W, et al. Mean platelet volume and mean platelet volume/platelet count  
30 ratio in infective endocarditis. *Platelets* 2014;25(8):559-61.  
31  
32 19. Azab B, Shah N, Akerman M, et al. Value of platelet/lymphocyte ratio as a predictor of all-cause  
33 mortality after non-ST-elevation myocardial infarction. *Journal of thrombosis and*  
34 *thrombolysis* 2012;34(3):326-34.  
35  
36 20. Nording HM, Seizer P, Langer HF. Platelets in inflammation and atherogenesis. *Frontiers in*  
37 *immunology* 2015;6:98.  
38  
39 21. Kim CH, Kim SJ, Lee MJ, et al. An increase in mean platelet volume from baseline is associated  
40 with mortality in patients with severe sepsis or septic shock. *PLoS one* 2015;10(3):e0119437.  
41  
42 22. Manzoli TF, Delgado AF, Troster EJ, et al. Lymphocyte count as a sign of immunoparalysis and its  
43 correlation with nutritional status in pediatric intensive care patients with sepsis: A pilot  
44 study. *Clinics (Sao Paulo)* 2016;71(11):644-49.  
45  
46 23. Felmet KA, Hall MW, Clark RS, et al. Prolonged lymphopenia, lymphoid depletion, and  
47 hypoprolactinemia in children with nosocomial sepsis and multiple organ failure. *J Immunol*  
48 2005;174(6):3765-72.  
49  
50 24. Nunez J, Minana G, Bodi V, et al. Low lymphocyte count and cardiovascular diseases. *Current*  
51 *medicinal chemistry* 2011;18(21):3226-33.  
52  
53 25. Otton R, Soriano FG, Verlengia R, et al. Diabetes induces apoptosis in lymphocytes. *The Journal of*  
54 *endocrinology* 2004;182(1):145-56.  
55  
56 26. Akboga MK, Canpolat U, Yayla C, et al. Association of Platelet to Lymphocyte Ratio With  
57 Inflammation and Severity of Coronary Atherosclerosis in Patients With Stable Coronary  
58 Artery Disease. *Angiology* 2016;67(1):89-95.  
59  
60 27. Gary T, Pichler M, Belaj K, et al. Platelet-to-lymphocyte ratio: a novel marker for critical limb  
ischemia in peripheral arterial occlusive disease patients. *PLoS one* 2013;8(7):e67688.  
28. Mertoglu C, Gunay M. Neutrophil-Lymphocyte ratio and Platelet-Lymphocyte ratio as useful



- 1  
2  
3 predictive markers of prediabetes and diabetes mellitus. *Diabetes & metabolic syndrome*  
4 2017;11 Suppl 1:S127-S31.
- 5 29. Akbas EM, Hamur H, Demirtas L, et al. Predictors of epicardial adipose tissue in patients with  
6 type 2 diabetes mellitus. *Diabetology & metabolic syndrome* 2014;6:55.
- 7  
8 30. Wang YQ, Zhi QJ, Wang XY, et al. Prognostic value of combined platelet, fibrinogen, neutrophil to  
9 lymphocyte ratio and platelet to lymphocyte ratio in patients with lung adenocarcinoma  
10 cancer. *Oncology letters* 2017;14(4):4331-38.
- 11 31. Wang Y, Attar BM, Fuentes HE, et al. Evaluation of the prognostic value of platelet to lymphocyte  
12 ratio in patients with hepatocellular carcinoma. *Journal of gastrointestinal oncology*  
13 2017;8(6):1065-71.
- 14 32. Wang L, Liang D, Xu X, et al. The prognostic value of neutrophil to lymphocyte and platelet to  
15 lymphocyte ratios for patients with lung cancer. *Oncology letters* 2017;14(6):6449-56.
- 16 33. Mao Y, Fu Y, Gao Y, et al. Platelet-to-lymphocyte ratio predicts long-term survival in laryngeal  
17 cancer. *European archives of oto-rhino-laryngology : official journal of the European*  
18 *Federation of Oto-Rhino-Laryngological Societies (EUFOS) : affiliated with the German*  
19 *Society for Oto-Rhino-Laryngology - Head and Neck Surgery* 2017.
- 20 34. Claushuis TA, van Vught LA, Scicluna BP, et al. Thrombocytopenia is associated with a  
21 dysregulated host response in critically ill sepsis patients. *Blood* 2016;127(24):3062-72.
- 22 35. Semeraro F, Colucci M, Caironi P, et al. Platelet Drop and Fibrinolytic Shutdown in Patients With  
23 Sepsis. *Critical care medicine* 2017.
- 24  
25  
26  
27  
28  
29  
30  
31  
32  
33  
34  
35  
36  
37  
38  
39  
40  
41  
42  
43  
44  
45  
46  
47  
48  
49  
50  
51  
52  
53  
54  
55  
56  
57  
58  
59  
60

Table 1 Comparison of baseline characteristics within three PLR levels

| Variable                                     | PLR ≤ 150<br>(n = 1780) | 150 < PLR ≤ 250<br>(n = 1380) | PLR > 250<br>(n = 2377) | p       |
|----------------------------------------------|-------------------------|-------------------------------|-------------------------|---------|
| Age (years)                                  | 63.0 ± 16.6             | 65.0 ± 16.6                   | 66.1 ± 15.5             | < 0.001 |
| Gender (male) [n (%)]                        | 805 (45.2)              | 590 (42.7)                    | 1096 (46.1)             | 0.133   |
| BMI (Kg/m <sup>2</sup> )                     | 30.8 ± 8.9              | 34.1 ± 13.5                   | 35.2 ± 39.5             | 0.001   |
| <b>Ethnicity</b>                             |                         |                               |                         |         |
| White [n (%)]                                | 1202 (67.5)             | 987 (71.5)                    | 1761 (74.0)             | 0.754   |
| Black [n (%)]                                | 180 (10.1)              | 101 (7.3)                     | 146 (6.1)               | < 0.001 |
| Asian [n (%)]                                | 39 (2.2)                | 30 (2.1)                      | 71 (2.9)                | 0.169   |
| Emergency [n (%)]                            | 1641 (92.1)             | 1284 (93.0)                   | 2229 (93.7)             | 0.138   |
| <b>ICU type</b>                              |                         |                               |                         |         |
| MICU [n (%)]                                 | 953 (53.5)              | 727 (52.6)                    | 1362 (57.2)             | 0.008   |
| CCU/CSRU [n (%)]                             | 413 (23.2)              | 323 (23.4)                    | 453 (19.0)              | 0.001   |
| TSICU/SICU [n (%)]                           | 414 (23.2)              | 330 (23.9)                    | 562 (23.6)              | 0.908   |
| <b>Vasopressors</b>                          |                         |                               |                         |         |
| Norepinephrine [n (%)]                       | 566 (31.7)              | 374 (27.1)                    | 711 (29.9)              | 0.016   |
| Dopamine [n (%)]                             | 198 (11.1)              | 151 (10.9)                    | 256 (10.7)              | 0.013   |
| Epinephrine [n (%)]                          | 67 (3.7)                | 28 (2.0)                      | 37 (1.5)                | < 0.001 |
| Vasopressin [n (%)]                          | 156 (8.7)               | 88 (6.3)                      | 172 (7.2)               | 0.033   |
| Overall vasopressor use                      | 701 (39.3)              | 482 (34.9)                    | 858 (36.1)              | 0.022   |
| <b>Fluid input/output</b>                    |                         |                               |                         |         |
| Fluid intake (ml/kg/48hr)                    | 99.9 ± 60.9             | 90.7 ± 57.6                   | 97.2 ± 61.2             | < 0.001 |
| Urine output (ml/kg/48hr)                    | 42.0 ± 32.0             | 42.9 ± 30.3                   | 41.9 ± 29.5             | 0.5659  |
| Fluid balance (ml/kg/48hr)                   | 46.7 ± 59.4             | 38.3 ± 55.1                   | 46.0 ± 60.4             | < 0.001 |
| <b>Infection site</b>                        |                         |                               |                         |         |
| Respiratory infection                        | 1048 (58.8)             | 929 (67.3)                    | 1580 (66.4)             | < 0.001 |
| Blood infection                              | 768 (43.1)              | 509 (36.8)                    | 998 (41.9)              | 0.001   |
| Urinary infection                            | 549 (30.8)              | 409 (29.6)                    | 682 (28.6)              | 0.323   |
| Abdominal infection                          | 245 (13.7)              | 159 (11.5)                    | 334 (14.0)              | 0.072   |
| Cerebral infection                           | 153 (8.5)               | 106 (7.6)                     | 169 (7.1)               | 0.206   |
| <b>Disease severity scores</b>               |                         |                               |                         |         |
| SOFA on ICU admission<br>median (IQR)        | 6 (4–9)                 | 5 (4–8)                       | 5 (3–7)                 | < 0.001 |
| Maximum SOFA during ICU stay<br>median (IQR) | 10 (7–14)               | 9 (7–12)                      | 9 (7–12)                | < 0.001 |
| <b>Laboratory outcomes</b>                   |                         |                               |                         |         |
| Maximum serum creatinine (mg/L)              | 2.5 ± 2.7               | 2.2 ± 2.1                     | 2.1 ± 1.9               | < 0.001 |
| Minimum hemoglobin level (g/dl)              | 8.3 ± 1.7               | 8.69 ± 1.7                    | 8.4 ± 1.6               | < 0.001 |
| Maximum serum sodium (mmol/L)                | 145.1 ± 5.4             | 145.0 ± 5.2                   | 144.6 ± 5.1             | 0.009   |
| Maximum serum lactate (mmol/L)               | 4.1 ± 3.8 (n=1536)      | 3.4 ± 3.1 (n=1174)            | 3.1 ± 3.0 (n=2112)      | < 0.001 |
| Platelet count (10 <sup>9</sup> /L)          | 146.7 ± 88.0            | 225.1 ± 107.2                 | 197.5 ± 163.4           | < 0.001 |
| Lymphocyte count (10 <sup>9</sup> /L)        | 2.1 ± 5.7               | 1.1 ± 0.5                     | 0.68 ± 0.4              | < 0.001 |

|                                   |             |              |               |         |
|-----------------------------------|-------------|--------------|---------------|---------|
| <b>PLR</b>                        | 91.8 ± 37.1 | 195.8 ± 28.6 | 557.5 ± 484.8 | < 0.001 |
| <b>Clinical outcomes</b>          |             |              |               |         |
| <b>ICU LOS</b>                    | 9.9 ± 10.1  | 9.3 ± 8.7    | 10.1 ± 9.9    | 0.071   |
| <b>Hospital LOS</b>               | 17.7 ± 15.1 | 16.6 ± 13.5  | 17.2 ± 13.7   | 0.082   |
| <b>AKI [n (%)]</b>                | 861 (48.3)  | 601 (43.5)   | 1080 (45.4)   | 0.022   |
| <b>Hospital mortality [n (%)]</b> | 475 (26.6)  | 291 (21.0)   | 621 (26.1)    | < 0.001 |

Abbreviations:

PLR: platelet to lymphocyte ratio; BMI body mass index; MICU, multiple intensive care unit; CCU, coronary care unit; CSRU, cardiac surgery care unit; TSICU, traumatic surgical intensive care unit; SICU, surgical intensive care unit; SOFA, sequential organ failure assessment; SAPS II, Simplified Acute Physiology Score II; IQR, interquartile range; LOS length of stay; AKI, acute kidney injury.

For peer review only

Table 2 multivariable logistic regressions of PLR using linear spline function

| Variables                          | Crude Odds ratio | 95% CI          | p       | Adjusted Odds ratio | 95% CI          | p       |
|------------------------------------|------------------|-----------------|---------|---------------------|-----------------|---------|
| <b>PLR (≤ 200)</b>                 | 0.997            | 0.996 – 0.998   | < 0.001 | 0.9993              | 0.9980 – 1.0006 | 0.319   |
| <b>PLR (&gt; 200)</b>              | 1.0002           | 1.0001 – 1.0004 | 0.001   | 1.0002              | 1.0000 – 1.0003 | 0.025   |
| <b>Age (&gt; 65)</b>               | 1.77             | 1.56 – 2.11     | < 0.001 | 2.32                | 1.99 – 2.64     | < 0.001 |
| <b>Maximum SOFA</b>                | 1.20             | 1.18 – 1.22     | < 0.001 | 1.18                | 1.16 – 1.20     | < 0.001 |
| <b>Urinary infection</b>           | 0.66             | 0.57 – 0.76     | < 0.001 | 0.65                | 0.56 – 0.76     | < 0.001 |
| <b>Respiratory infection</b>       | 1.29             | 1.13 – 1.47     | < 0.001 | 1.25                | 1.09 – 1.45     | 0.002   |
| <b>Blood infection</b>             | 2.14             | 1.89 – 2.42     | < 0.001 | 1.49                | 1.29 – 1.71     | < 0.001 |
| <b>Fluid balance (ml/kg/48hrs)</b> | 1.006            | 1.005 – 1.007   | < 0.001 | 1.002               | 1.0008 – 1.0031 | 0.001   |
| <b>MICU</b>                        | 1.34             | 1.15 – 1.56     | < 0.001 | 1.15                | 0.97 – 1.37     | 0.089   |
| <b>CCU/CSRU</b>                    | 1.22             | 1.01 – 1.47     | 0.032   | 1.03                | 0.84 – 1.26     | 0.752   |

Note: The mean variance inflation factor was 2.89 and p value of goodness of fit was 0.632.

Abbreviation: PLR platelet to lymphocyte ratio; CI confidence interval; SOFA sequential organ failure assessment; MICU multiple intensive care unit; CCU coronary care unit; CSRU cardiac surgery care unit.

Table 3 Association between three PLR levels and hospital mortality

|                | PLR ≤ 150          |         | 150 < PLR ≤ 250 |   | PLR > 250          |       |
|----------------|--------------------|---------|-----------------|---|--------------------|-------|
|                | OR (95% CI)        | p       | OR (95% CI)     | p | OR (95% CI)        | p     |
| <b>Model 1</b> | 1.41 (1.19 – 1.67) | < 0.001 | Ref.            | – | 1.28 (1.09 – 1.51) | 0.002 |
| <b>Model 2</b> | 1.34 (1.13 – 1.59) | 0.001   | Ref.            | – | 1.23 (1.05 – 1.45) | 0.009 |
| <b>Model 3</b> | 1.35 (1.14 – 1.61) | 0.001   | Ref.            | – | 1.21 (1.03 – 1.43) | 0.018 |
| <b>Model 4</b> | 1.15 (0.96 – 1.38) | 0.123   | Ref.            | – | 1.29 (1.09 – 1.53) | 0.003 |

Adjusted covariates: Model 1 = age, admitted ICU type. Model 2 = Model 1+ (fluid balance at 48 hours after ICU admission). Model 3= Model 2 + (infection sites). Model 4 = Model 3+ (Maximum SOFA score during ICU stay).

Abbreviations: PLR platelet to lymphocyte ratio; OR = odds ratio; CI= confidence interval; Ref reference category.

1  
2  
3  
4  
5  
6 **Figure legend:**  
7

8 Figure 1: The crude and adjusted odds ratios in the subgroup analysis. PLR level 2  
9 was used as the reference level in all of the logistic models.  
10

11  
12  
13 Abbreviations: PLR, platelet-to-lymphocyte ratio; AKI, acute kidney injury; SOFA,  
14 Sequential Organ Failure Assessment; CI, confidence interval  
15  
16  
17  
18  
19  
20  
21  
22  
23  
24  
25  
26  
27  
28  
29  
30  
31  
32  
33  
34  
35  
36  
37  
38  
39  
40  
41  
42  
43  
44  
45  
46  
47  
48  
49  
50  
51  
52  
53  
54  
55  
56  
57  
58  
59  
60

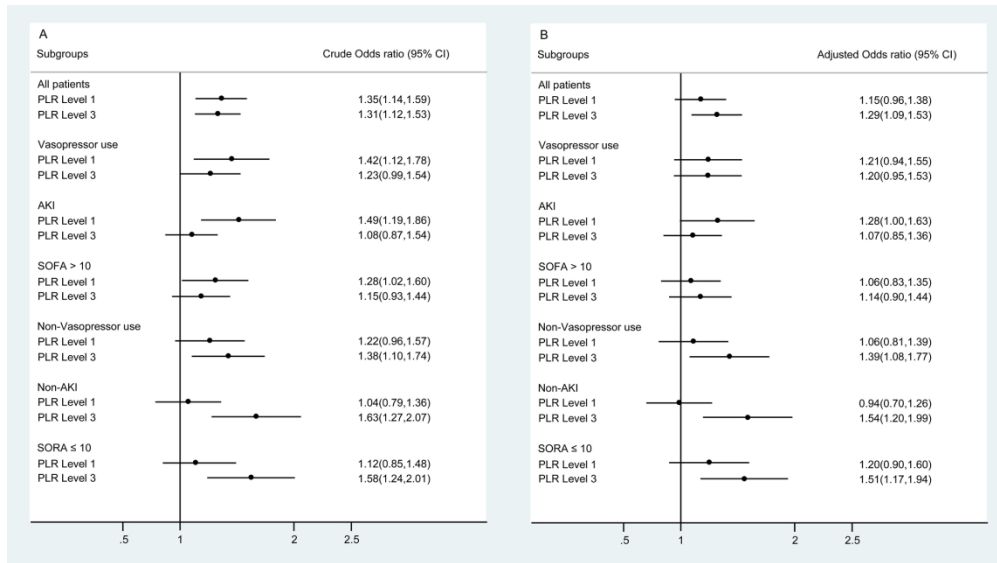

Figure 1: The crude and adjusted odds ratios in the subgroup analysis. PLR level 2 was used as the reference level in all of the logistic models.  
 Abbreviations: PLR, platelet-to-lymphocyte ratio; AKI, acute kidney injury; SOFA, Sequential Organ Failure Assessment; CI, confidence interval

182x102mm (300 x 300 DPI)

Table S1 Risk factors associated with in-hospital mortality

| Variables                             | Odds ratio | 95% CI        | p       |
|---------------------------------------|------------|---------------|---------|
| Age (> 65)                            | 1.77       | 1.56 – 2.01   | < 0.001 |
| Gender (male)                         | 0.91       | 0.81 – 1.03   | 0.173   |
| BMI (kg/m <sup>2</sup> )              | 1.00       | 0.99 – 1.00   | 0.485   |
| TSICU/SICU                            | Ref.       | –             | –       |
| MICU                                  | 1.34       | 1.15 – 1.56   | < 0.001 |
| CCU/CSRU                              | 1.22       | 1.01 – 1.47   | 0.032   |
| Fluid balance (ml/kg/48hrs)           | 1.006      | 1.005 – 1.007 | < 0.001 |
| Urine output (ml/kg/48hrs)            | 0.98       | 0.98 – 0.98   | < 0.001 |
| Respiratory infection                 | 1.29       | 1.13 – 1.47   | < 0.001 |
| Blood infection                       | 2.14       | 1.89 – 2.42   | < 0.001 |
| Urinary infection                     | 0.66       | 0.57 – 0.76   | < 0.001 |
| Abdominal infection                   | 0.93       | 0.77 – 1.11   | 0.458   |
| Cerebral infection                    | 0.66       | 0.51 – 0.85   | 0.002   |
| SOFA on ICU admission                 | 1.15       | 1.13 – 1.17   | < 0.001 |
| Maximum SOFA                          | 1.20       | 1.18 – 1.22   | < 0.001 |
| Maximum serum creatinine (mg/L)       | 1.15       | 1.12 – 1.19   | < 0.001 |
| Minimum hemoglobin level (g/dl)       | 0.84       | 0.81 – 0.88   | < 0.001 |
| Maximum serum sodium (mmol/L)         | 1.02       | 1.01 – 1.02   | < 0.001 |
| Platelet count (10 <sup>9</sup> /L)   | 0.998      | 0.997 – 0.998 | < 0.001 |
| Lymphocyte count (10 <sup>9</sup> /L) | 0.972      | 0.934 – 1.01  | 0.163   |

Abbreviations: BMI, body mass index; MICU, multiple intensive care unit; CCU, coronary care unit; CSRU, cardiac surgery care unit; TSICU, traumatic surgical intensive care unit; SICU, surgical intensive care unit; SOFA, sequential organ failure assessment;



Table S2 Adjusted odds ratio of hospital mortality using PLR as design variable in multivariable logistic regression

| Variables                   | Odds ratio | 95% CI          | p         |
|-----------------------------|------------|-----------------|-----------|
| PLR Level 1 ( $\leq 150$ )  | 1.15       | 0.96 – 1.38     | 0.123     |
| PLR Level 2 (151 ~ 250)     | Ref.       | –               | –         |
| PLR Level 3 ( $> 250$ )     | 1.29       | 1.09 – 1.53     | 0.003     |
| Age ( $> 65$ )              | 2.27       | 1.97 – 2.62     | $< 0.001$ |
| Maximum SOFA                | 1.19       | 1.16 – 1.21     | $< 0.001$ |
| Urinary infection           | 0.65       | 0.56 – 0.76     | $< 0.001$ |
| Respiratory infection       | 1.25       | 1.08 – 1.44     | 0.002     |
| Blood infection             | 1.49       | 1.29 – 1.71     | $< 0.001$ |
| Fluid balance (ml/kg/48hrs) | 1.002      | 1.0008 – 1.0031 | 0.001     |
| MICU                        | 1.16       | 0.98 – 1.37     | 0.082     |
| CCU/CSRU                    | 1.04       | 0.84 – 1.27     | 0.700     |

Note: The mean variance inflation factor (VIF) was 2.53 and p value of goodness of fit was 0.665.

Abbreviation: PLR, platelet to lymphocyte ratio; CI, confidence interval; SOFA, sequential organ failure assessment; MICU, multiple intensive care unit; CCU, coronary care unit; CSRU, cardiac surgery care unit.

Table S3 Comparisons of subgroups according to the existence of vasopressor use, AKI and SOFA score

| Variables                                  | Vasopressor-use<br>(n = 2554) | Non-Vasopressor-use<br>(n = 2983) | p       | AKI<br>(n = 2542) | Non-AKI<br>(n = 2995) | p       | SOFA > 10<br>(n = 2390) | SOFA ≤ 10<br>(n = 2147) | p       |
|--------------------------------------------|-------------------------------|-----------------------------------|---------|-------------------|-----------------------|---------|-------------------------|-------------------------|---------|
| <b>Age</b>                                 | 66.3 ± 15.2                   | 63.6 ± 16.8                       | < 0.001 | 65.1 ± 15.4       | 64.6 ± 16.8           | 0.211   | 64.0 ± 15.7             | 65.5 ± 16.4             | < 0.001 |
| <b>Vasopressor-use [n (%)]</b>             | -                             | -                                 | -       | 1321              | 1233                  | < 0.001 | 1554                    | 1000                    | < 0.001 |
| <b>Fluid intake (ml/kg/48hr)</b>           | 114.4 ± 661.                  | 81.1 ± 50.0                       | < 0.001 | 94.3 ± 62.0       | 98.3 ± 58.8           | 0.013   | 110.7 ± 65.5            | 85.6 ± 53.6             | < 0.001 |
| <b>Fluid balance (ml/kg/48hr)</b>          | 63.2 ± 64.1                   | 28.1 ± 48.5                       | < 0.001 | 48.4 ± 60.9       | 40.8 ± 56.9           | < 0.001 | 62.0 ± 64.1             | 30.8 ± 50.6             | < 0.001 |
| <b>Maximum SOFA median (IQR)</b>           | 12 (9 – 14)                   | 8 (6 – 11)                        | < 0.001 | 11 (8 – 14)       | 9 (7 – 11)            | < 0.001 | 13 (12 – 15)            | 7 (6 – 9)               | < 0.001 |
| <b>Platelet count (10<sup>9</sup>/L)</b>   | 225.0 ± 240.1                 | 236.0 ± 148.7                     | 0.005   | 219.2 ±<br>143.4  | 240.9 ± 145.5         | < 0.001 | 208.4 ± 147.1           | 248.1 ± 140.8           | < 0.001 |
| <b>Lymphocyte count (10<sup>9</sup>/L)</b> | 1.26 ± 3.32                   | 1.28 ± 3.32                       | 0.890   | 1.21 ± 2.21       | 1.32 ± 4.03           | 0.246   | 1.24 ± 3.42             | 1.29 ± 3.24             | 0.529   |
| <b>Hospital LOS</b>                        | 17.8 ± 14.3                   | 16.7 ± 14.1                       | 0.002   | 19.7 ± 15.6       | 15.1 ± 12.3           | < 0.001 | 19.6 ± 14.6             | 15.5 ± 13.4             | < 0.001 |
| <b>AKI [n (%)]</b>                         | 1321                          | 1221                              | < 0.001 | -                 | -                     | -       | 1360                    | 1182                    | < 0.001 |
| <b>Hospital mortality [n (%)]</b>          | 777                           | 612                               | < 0.001 | 875               | 514                   | < 0.001 | 884                     | 505                     | < 0.001 |

Abbreviation: SOFA, sequential organ failure assessment; IQR, interquartile range; LOS, length of stay; AKI, acute kidney injury.

Figure S1 Crude relationship between hospital mortality and PLR

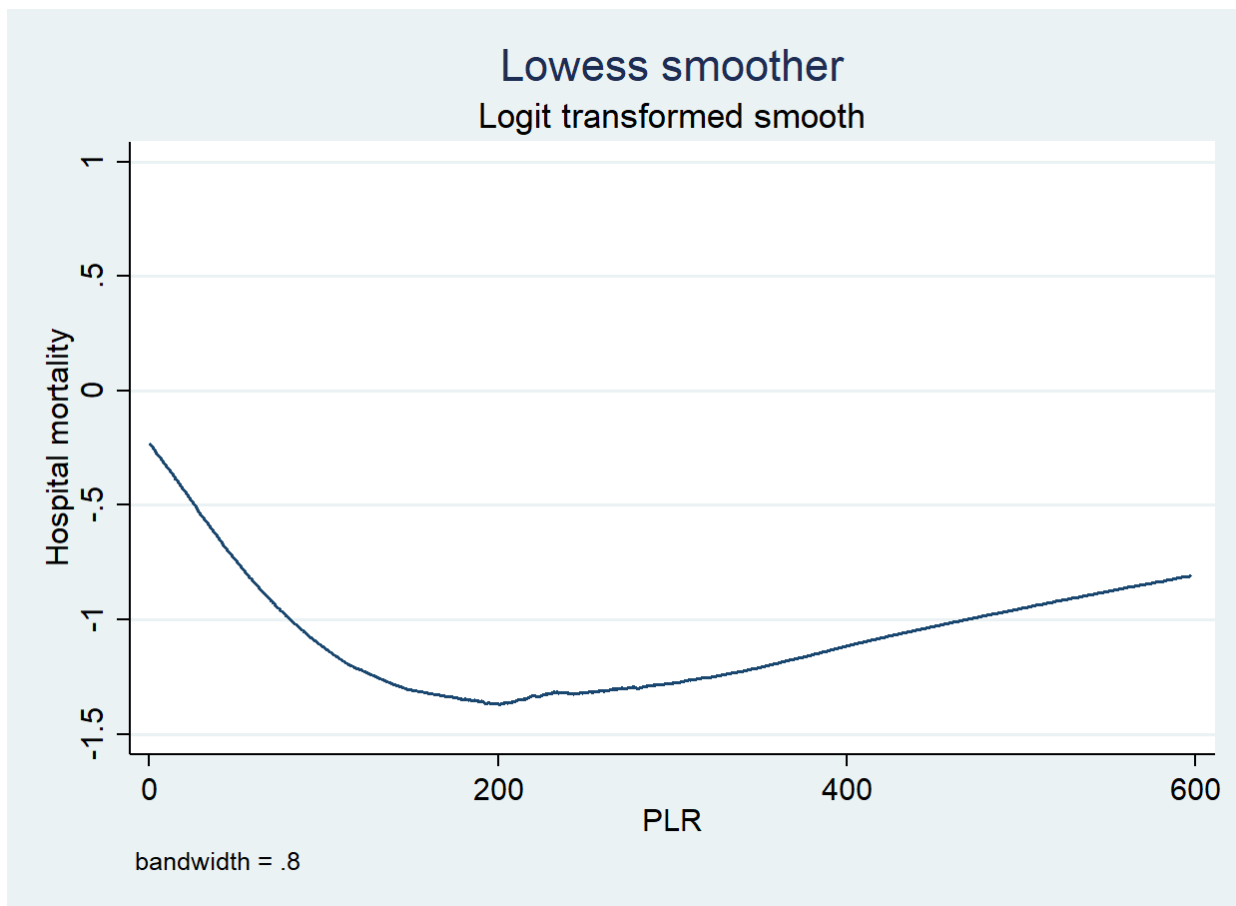

view only

**STROBE 2007 (v4) Statement—Checklist of items that should be included in reports of *cohort studies***

| Section/Topic                | Item # | Recommendation                                                                                                                                                                       | Reported on page # |
|------------------------------|--------|--------------------------------------------------------------------------------------------------------------------------------------------------------------------------------------|--------------------|
| Title and abstract           | 1      | (a) Indicate the study's design with a commonly used term in the title or the abstract                                                                                               | 1                  |
|                              |        | (b) Provide in the abstract an informative and balanced summary of what was done and what was found                                                                                  | 2                  |
| <b>Introduction</b>          |        |                                                                                                                                                                                      |                    |
| Background/rationale         | 2      | Explain the scientific background and rationale for the investigation being reported                                                                                                 | 4                  |
| Objectives                   | 3      | State specific objectives, including any prespecified hypotheses                                                                                                                     | 4                  |
| <b>Methods</b>               |        |                                                                                                                                                                                      |                    |
| Study design                 | 4      | Present key elements of study design early in the paper                                                                                                                              | 5-6                |
| Setting                      | 5      | Describe the setting, locations, and relevant dates, including periods of recruitment, exposure, follow-up, and data collection                                                      | 5-7                |
| Participants                 | 6      | (a) Give the eligibility criteria, and the sources and methods of selection of participants. Describe methods of follow-up                                                           | 5                  |
|                              |        | (b) For matched studies, give matching criteria and number of exposed and unexposed                                                                                                  |                    |
| Variables                    | 7      | Clearly define all outcomes, exposures, predictors, potential confounders, and effect modifiers. Give diagnostic criteria, if applicable                                             | 6                  |
| Data sources/<br>measurement | 8*     | For each variable of interest, give sources of data and details of methods of assessment (measurement). Describe comparability of assessment methods if there is more than one group | 5                  |
| Bias                         | 9      | Describe any efforts to address potential sources of bias                                                                                                                            | 7                  |
| Study size                   | 10     | Explain how the study size was arrived at                                                                                                                                            | 5                  |
| Quantitative variables       | 11     | Explain how quantitative variables were handled in the analyses. If applicable, describe which groupings were chosen and why                                                         | 6-7                |
| Statistical methods          | 12     | (a) Describe all statistical methods, including those used to control for confounding                                                                                                | 7-8                |
|                              |        | (b) Describe any methods used to examine subgroups and interactions                                                                                                                  | 8                  |
|                              |        | (c) Explain how missing data were addressed                                                                                                                                          | 7                  |
|                              |        | (d) If applicable, explain how loss to follow-up was addressed                                                                                                                       | N/A.               |
|                              |        | (e) Describe any sensitivity analyses                                                                                                                                                | N/A.               |
| <b>Results</b>               |        |                                                                                                                                                                                      |                    |

|                          |     |                                                                                                                                                                                                              |      |
|--------------------------|-----|--------------------------------------------------------------------------------------------------------------------------------------------------------------------------------------------------------------|------|
| Participants             | 13* | (a) Report numbers of individuals at each stage of study—eg numbers potentially eligible, examined for eligibility, confirmed eligible, included in the study, completing follow-up, and analysed            | 8    |
|                          |     | (b) Give reasons for non-participation at each stage                                                                                                                                                         | N/A. |
|                          |     | (c) Consider use of a flow diagram                                                                                                                                                                           | N/A. |
| Descriptive data         | 14* | (a) Give characteristics of study participants (eg demographic, clinical, social) and information on exposures and potential confounders                                                                     | 8    |
|                          |     | (b) Indicate number of participants with missing data for each variable of interest                                                                                                                          | 7    |
|                          |     | (c) Summarise follow-up time (eg, average and total amount)                                                                                                                                                  | N/A. |
| Outcome data             | 15* | Report numbers of outcome events or summary measures over time                                                                                                                                               | 9    |
| Main results             | 16  | (a) Give unadjusted estimates and, if applicable, confounder-adjusted estimates and their precision (eg, 95% confidence interval). Make clear which confounders were adjusted for and why they were included | 7    |
|                          |     | (b) Report category boundaries when continuous variables were categorized                                                                                                                                    | 7    |
|                          |     | (c) If relevant, consider translating estimates of relative risk into absolute risk for a meaningful time period                                                                                             | N/A. |
| Other analyses           | 17  | Report other analyses done—eg analyses of subgroups and interactions, and sensitivity analyses                                                                                                               | 7    |
| <b>Discussion</b>        |     |                                                                                                                                                                                                              |      |
| Key results              | 18  | Summarise key results with reference to study objectives                                                                                                                                                     | 10   |
| <b>Limitations</b>       |     |                                                                                                                                                                                                              |      |
| Interpretation           | 20  | Give a cautious overall interpretation of results considering objectives, limitations, multiplicity of analyses, results from similar studies, and other relevant evidence                                   | 14   |
| Generalisability         | 21  | Discuss the generalisability (external validity) of the study results                                                                                                                                        | N/A. |
| <b>Other information</b> |     |                                                                                                                                                                                                              |      |
| Funding                  | 22  | Give the source of funding and the role of the funders for the present study and, if applicable, for the original study on which the present article is based                                                | 15   |

\*Give information separately for cases and controls in case-control studies and, if applicable, for exposed and unexposed groups in cohort and cross-sectional studies.

**Note:** An Explanation and Elaboration article discusses each checklist item and gives methodological background and published examples of transparent reporting. The STROBE checklist is best used in conjunction with this article (freely available on the Web sites of PLoS Medicine at <http://www.plosmedicine.org/>, Annals of Internal Medicine at <http://www.annals.org/>, and Epidemiology at <http://www.epidem.com/>). Information on the STROBE Initiative is available at [www.strobe-statement.org](http://www.strobe-statement.org).

# BMJ Open

## Platelet-to-lymphocyte ratio as a prognostic predictor of mortality for sepsis: Interaction effect with disease severity. A retrospective study

|                                 |                                                                                                                                                                                                             |
|---------------------------------|-------------------------------------------------------------------------------------------------------------------------------------------------------------------------------------------------------------|
| Journal:                        | <i>BMJ Open</i>                                                                                                                                                                                             |
| Manuscript ID                   | bmjopen-2018-022896.R2                                                                                                                                                                                      |
| Article Type:                   | Research                                                                                                                                                                                                    |
| Date Submitted by the Author:   | 23-Jul-2018                                                                                                                                                                                                 |
| Complete List of Authors:       | Shen, Yanfei; Zhejiang Hospital, Intensive care unit<br>Huang, Xinmei; Jinhua TCM hospital, Department of otolaryngological<br>Zhang, Weimin; Department of Intensive Care Unit, Dongyang People's Hospital |
| <b>Primary Subject Heading</b>: | Intensive care                                                                                                                                                                                              |
| Secondary Subject Heading:      | Intensive care, Infectious diseases                                                                                                                                                                         |
| Keywords:                       | sepsis, PLR, mortality, MIMIC III                                                                                                                                                                           |
|                                 |                                                                                                                                                                                                             |

SCHOLARONE™  
Manuscripts

**Title page**

Platelet-to-lymphocyte ratio as a prognostic predictor of mortality for sepsis:  
Interaction effect with disease severity. A retrospective study

**Author names:** Yanfei Shen<sup>1\*</sup>, Xinmei Huang<sup>2#</sup>, Weimin Zhang<sup>3</sup>.

**Affiliations:**

1. Department of Intensive Care Unit, Zhejiang Hospital, 12# Lingyin Road, Hangzhou, Zhejiang, China.

2. Department of otolaryngological, Jinhua TCM hospital, No. 439, Shuangxi West Road, Jinhua, Zhejiang, 322100, P.R. China.

3. Department of Intensive Care Unit, Dongyang People's Hospital, No. 60, Wuning West Road, Dongyang, Zhejiang, 322100, P.R. China.

# Author Xinmei Huang contributed equally to this study and was listed as co-first author.

\* **Corresponding author:** Yanfei Shen.

E-mail: snow.shen@hotmail.com

Phone: +86-137-3890-3218

Word count: 3542.

## Abstract

**Objective:** The role of platelet-to-lymphocyte ratio (PLR) as an indicator of inflammation has been the focus of research recently. We aimed to investigate the prognostic value of PLR for sepsis.

**Design:** A retrospective cohort study.

**Setting and Participants:** Data were extracted from the Multi-parameter Intelligent Monitoring in Intensive Care III database. Data on 5,537 sepsis patients were analyzed.

**Methods:** Logistic regression was used to explore the association between PLR and hospital mortality. Subgroup analyses were performed based on vasopressor use, acute kidney injury (AKI), and a Sequential Organ Failure Assessment (SOFA) score > 10.

**Results:** In the logistic model with linear spline function, a PLR > 200 was significantly (odds ratio [OR], 1.0002; 95% confidence interval [CI], 1.0001 – 1.0004) associated with mortality; the association was non-significant for PLRs  $\leq$  200 (OR, 0.997; 95% CI, 1.19 – 1.67). In the logistic model using the PLR as a design variable, only high PLRs were significantly associated with mortality (OR, 1.29; 95% CI, 1.09 – 1.53); the association with low PLRs was non-significant (OR, 1.15; 95% CI, 0.96 – 1.38). In the subgroups with vasopressor use, AKI, and a SOFA score > 10, the association between high PLR and mortality was non-significant; this remained significant in the subgroups without vasopressor use (OR, 1.39; 95% CI, 1.08 – 1.77) and AKI (OR, 1.54; 95% CI, 1.20 – 1.99), and with a SOFA score  $\leq$  10 (OR, 1.51; 95% CI, 1.17 – 1.94).



1  
2  
3  
4 **Conclusions:** High PLRs at admission were associated with an increased risk of  
5  
6 mortality. In patients with vasopressor use, AKI, or a SOFA score > 10, this association  
7  
8 was non-significant.  
9

10  
11 **Keywords:** sepsis, PLR, mortality, MIMIC III.  
12  
13  
14  
15

### 16 **Strengths and limitations of this study:**

17 The large sample size facilitated a robust conclusion.

18  
19 Subgroup analysis was performed to investigate the interaction between disease  
20  
21 severity and PLR.  
22  
23

24 Pre-ICU data were not available in this database which may lead to bias.

25  
26 Patients with septic shock could not be identified in this database.  
27  
28  
29  
30  
31  
32  
33  
34  
35  
36  
37  
38  
39  
40  
41  
42  
43  
44  
45  
46  
47  
48  
49  
50  
51  
52  
53  
54  
55  
56  
57  
58  
59  
60

## **INTRODUCTION**

1  
2  
3  
4 Sepsis is a major cause of morbidity and mortality, worldwide, and it results  
5  
6 from a dysregulation of the systemic inflammatory response to infection <sup>1 2</sup>. Despite  
7  
8 significant advances in the pathophysiology and therapeutic strategies for sepsis, the  
9  
10 mortality remains high <sup>3</sup>, at 300 deaths per 100,000 people <sup>4</sup>. An extremely complex  
11  
12 systemic expression of inflammatory and anti-inflammatory response plays a critical  
13  
14 role in the pathophysiological process of sepsis, which is strongly associated with an  
15  
16 increased risk of mortality <sup>5</sup>. Identifying patients who are at a high risk of poor  
17  
18 outcomes, in the early stage of sepsis, is vital for timely and adequate intervention <sup>6</sup>.  
19  
20 While a significant amount of effort has been put into investigating promising  
21  
22 biomarkers, the challenge of identifying these at-risk patients remains <sup>7</sup>.  
23  
24  
25  
26  
27  
28  
29

30 In recent years, studies have reported that platelets and lymphocytes play critical  
31  
32 roles in the inflammatory process. Therefore, the platelet-to-lymphocyte ratio (PLR)--a  
33  
34 novel inflammatory factor--has received research attention recently, as it may act as  
35  
36 an indicator of inflammation <sup>8</sup> in a wide spectrum of diseases, such as myocardial  
37  
38 infarction <sup>9</sup>, acute kidney injury (AKI) <sup>10</sup>, hepatocellular carcinoma <sup>11</sup>, and non-small  
39  
40 cell lung cancer <sup>12</sup>.  
41  
42  
43  
44

45 Based on the findings of previous studies, it is reasonable to speculate the  
46  
47 presence of a potential relationship between PLR and mortality for sepsis. However,  
48  
49 no investigation has been conducted. Therefore, in this study we aimed to investigate  
50  
51 the prognostic value of PLR for sepsis.  
52  
53  
54  
55  
56  
57

## 58 **MATERIALS AND METHODS**

59  
60

## Database introduction

All the data in the current study were extracted from an online international database—Multi-parameter Intelligent Monitoring in Intensive Care III (MIMIC III)—that was published by the Massachusetts Institute of Technology, with approval from the review boards of the Massachusetts Institute of Technology and Beth Israel Deaconess Medical Center. All the patients in the database were de-identified for privacy protection and the need for informed consent was waived. This database included more than 58,000 patients who were admitted to the intensive care unit (ICU) of the Beth Israel Deaconess Medical Center from 2001 to 2008. Author Y Shen obtained access to this database (certification number: 1564657), and was responsible for data extraction.

## Inclusion and exclusion criteria

Adult patients meeting the criteria for sepsis were initially screened. The definition of sepsis was adapted from the recommendation in the Surviving Sepsis Campaign 2016<sup>13</sup>. Accordingly, sepsis was defined as the presence of a Sequential Organ Failure Assessment (SOFA) score  $\geq 2$  within 24 hours after ICU admission, accompanied by at least one infection site. The following criteria were used to exclude patients from this analysis: 1. Age lower than 18 years; 2. Having spent less than 48 hours in the ICU; and 3. Absence of data on the serum platelet and lymphocyte counts within 24 hours after ICU admission. For patients who were admitted to the ICU more than once, only the first ICU stay was considered in this study.

## Data extraction

1  
2  
3  
4 Data on the demographic characteristics, laboratory outcomes, infection sites,  
5  
6 vasopressor use, and disease severity score were extracted from the database. Only  
7  
8 patients with data on the serum platelet and lymphocyte counts within the first 24  
9  
10 hours after ICU admission were included. The first blood sample after ICU admission  
11  
12 was used to calculate the PLR, which was defined as the ratio of the absolute platelet  
13  
14 count and absolute lymphocyte count. Septic shock was considered as a special  
15  
16 subgroup of sepsis. However, it was difficult to identify patients with septic shock in  
17  
18 this database due to a lack of relevant information. Thus, data on vasopressor use  
19  
20 were extracted for the subgroup analysis. Vasopressor use was defined as the use of  
21  
22 any vasopressor agent, including norepinephrine, epinephrine, dobutamine,  
23  
24 dopamine or vasopressin, within 48 hours after ICU admission.  
25  
26  
27  
28  
29  
30  
31

### 32 Outcome definition

33  
34  
35 The primary endpoint was hospital mortality, which was defined as death during  
36  
37 hospitalization. The presence of AKI was defined according to the Creatinine-based  
38  
39 Kidney Disease Improving Global Outcome criteria without urine output<sup>14 15</sup>. A 1.5-  
40  
41 fold increase in the serum creatinine (SCr) level during the ICU stay, relative to the  
42  
43 level at the baseline, was considered as the presence of AKI. In the present cohort,  
44  
45 data on the baseline SCr values were missing in 20.3% of the cases. As AKI was not the  
46  
47 primary outcome, we used a reported estimation equation<sup>16</sup> (reported median  
48  
49 absolute error was 0.1–0.2 mg/dL) to calculate the missing values for patients without  
50  
51 previous SCr data:  $SCr = 0.74 - 0.2 \text{ (if female)} + 0.08 \text{ (if black)} + 0.0039 * \text{age (in years)}$ .  
52  
53  
54  
55  
56  
57

### 58 Management of missing data

1  
2  
3  
4 Variables with missing data are common in the MIMIC III database, as it comprises  
5  
6 more than 58,000 admissions. The percentage of missing values of serum lactate and  
7  
8 albumin was 12.9% and 26.3%, respectively. For serum lactate, the crude comparison  
9  
10 within three PLR levels is presented in Table 1, but was not included in the logistic  
11  
12 models. The serum albumin was completely excluded from this study. For the rest of  
13  
14 the variables included in the current study, the percentage of missing values was less  
15  
16 than 5%. For normal distribution variables, such as age and fluid balance, we replaced  
17  
18 the missing values with their mean values; For non-normal distribution parameters,  
19  
20 missing values were replaced by the respective median, instead of using the multiple  
21  
22 imputation technique. For dichotomous variables with less than 5% of missing values,  
23  
24 the missing values were not filled.  
25  
26  
27  
28  
29  
30  
31

#### 32 Patient and Public Involvement:

33  
34  
35 No patient was involved in any part of this study.  
36

#### 37 Statistical analysis

38  
39  
40 Continuous variables were expressed as mean  $\pm$  standard deviation or median  
41  
42 (interquartile range), as appropriate. A Student's t test, analysis of variance, Wilcoxon  
43  
44 rank-sum test, or Kruskal–Wallis test was used, as appropriate. Categorical data were  
45  
46 expressed as proportions, and compared using the  $\chi^2$  test. A knot of PLR (at a level of  
47  
48 around 200) was detected using the Lowess smoother technique; thus, the linear  
49  
50 spline function was initially used in the multivariate logistic regression. Thereafter, all  
51  
52 the patients were further divided into three levels: those with a PLR  $\leq$  150 (level 1),  
53  
54 150 < PLR  $\leq$  250 (level 2), and PLR > 250 (level 3). Variables including demographic  
55  
56  
57  
58  
59  
60

1  
2  
3  
4 characteristics, infection sites, disease severity score, and laboratory measures  
5  
6 potentially associated with mortality, or those that had a p value < 0.20 in the  
7  
8 univariate analyses were included in the multivariate logistic regression analyses<sup>17 18</sup>.  
9  
10 An extended model approach was used for covariate adjustment: Model 1 = adjusted  
11  
12 for age, admitted ICU type. Model 2 = Model 1+ (fluid balance at 48 hours after ICU  
13  
14 admission). Model 3 = Model 2 + (infection sites). Model 4 = Model 3 + (Maximum  
15  
16 SOFA score during the ICU stay). As we detected a U-shaped association between PLR  
17  
18 and mortality, we did not introduce interaction items (such as PLR multiply other  
19  
20 variables) in the logistic models. Instead, subgroup analyses were performed,  
21  
22 according to the presence of AKI and vasopressor use and the median SOFA score.  
23  
24 Multi-collinearity was tested using the variance inflation factor (VIF) method, with a  
25  
26 VIF  $\geq 5$  indicating the presence of multi-collinearity. All the logistic regression models  
27  
28 underwent a goodness of fit test. A two-tailed test was performed, and  $p < 0.05$  was  
29  
30 considered statistically significant. All statistical analyses were performed using STATA  
31  
32 11.2 (College Station, TX, USA).  
33  
34  
35  
36  
37  
38  
39  
40  
41  
42  
43  
44

## 45 RESULTS

### 46 Baseline characteristics

47  
48  
49  
50 Data on a total of 5,537 sepsis patients were included in this analysis. The overall  
51  
52 mortality observed was 25.1%. Data on the comparisons of the baseline characteristics  
53  
54 between the three PLR levels are listed in Table 1. The mean age at admission was  
55  
56 64.9 years, and 44.9% of the participants were male. The rate of vasopressor use  
57  
58  
59  
60

1  
2  
3  
4 (701/1780 vs. 482/1380,  $p=0.01$ ), and a maximum SOFA score (10 (7–14) vs. 9 (7–12),  
5  
6  
7  $p<0.001$ ) were significantly higher in PLR level 1 than level 2; the presence of these  
8  
9 variables was non-significant in level 3. The mortality was significantly higher among  
10  
11 those in level 1 (475/1780 vs. 291/1380,  $p<0.001$ ) and level 3 (621/2377 vs. 291/1380,  
12  
13  
14  $p=0.001$ ).

#### 17 Association between PLR and hospital mortality

19 The PLR was initially used as a continuous variable in the logistic model, using  
20  
21 linear spline function, as shown in Table 2. We observed that, for PLRs  $\leq 200$ , the odds  
22  
23 ratio (OR) of mortality was non-significant (OR, 0.997; 95% confidence interval [CI],  
24  
25 1.19 – 1.67), while the OR for PLRs  $> 200$  was significant (OR, 1.0002; 95% CI, 1.0001 –  
26  
27 1.0004), after adjustment for covariates including the SOFA score, with a mean VIF of  
28  
29 2.89. The crude association between hospital mortality and PLR was also presented in  
30  
31 Figure S1. In the extended multiple logistic regression analysis (Table 3), both low and  
32  
33 high PLR levels were significantly associated with increased hospital mortality, in  
34  
35 model 1 (OR, 1.41; 95% CI, 1.19 – 1.67 and OR, 1.28; 95% CI, 1.09 – 1.51, respectively),  
36  
37 model 2 (OR, 1.34; 95% CI, 1.13 – 1.59 and OR, 1.23; 95% CI, 1.05 – 1.45, respectively)  
38  
39 and model 3 (OR, 1.35; 95% CI, 1.14 – 1.61 and OR, 1.21; 95% CI, 1.03 – 1.43,  
40  
41 respectively). However, after adjustment for the maximum SOFA score in model 4, the  
42  
43 OR for low PLR levels became non-significant (OR, 1.15; 95% CI, 0.96 – 1.38,  $p=0.123$ ),  
44  
45 while that for high PLR levels remained significant (OR, 1.29; 95% CI, 1.09 – 1.53,  
46  
47  $p=0.003$ ), with a mean VIF of 2.53. The ORs of the covariates in model 4 are listed in  
48  
49 Table S1.  
50  
51  
52  
53  
54  
55  
56  
57  
58  
59  
60

## Subgroup analysis

As the association between PLR and mortality was largely confounded by the SOFA score (Table 3), we suspected that there was an interaction effect between disease severity and PLR level. Thus, we performed a subgroup analysis according to the existence of vasopressor use and AKI, and the median SOFA score (> 10 points), as shown in Figure 1. Unlike previous findings, the association between high PLRs and mortality became non-significant in the subgroups with vasopressor use (OR, 1.20; 95% CI, 0.95 – 1.53), AKI (OR, 1.07; 95% CI, 0.85 – 1.36), and a SOFA score > 10 (OR, 1.14; 95% CI, 0.90 – 1.44), and remained significant in the subgroups without vasopressor use (OR, 1.39; 95% CI, 1.08 – 1.77) and AKI (OR, 1.54; 95% CI, 1.20 – 1.99), and with a SOFA score  $\leq$  10 (OR, 1.51; 95% CI, 1.17 – 1.94). In the case of lower PLRs, the OR of mortality was non-significant in all the subgroups, after adjustment, except for the subgroup with AKI. Data on the comparisons of the characteristics between these subgroups are listed in Table S2. Finally, all the potential risk factors associated with in-hospital mortality were listed in Table S3.

## DISCUSSION

In this study, we observed a crude U-shaped association between the PLR and hospital mortality in patients with sepsis. However, after adjustment for the disease severity score, only high PLRs remained significantly associated with increased mortality; the association with low PLRs became non-significant. Furthermore, in the subgroup analysis, a significant association between high PLRs and mortality only



1  
2  
3  
4 existed in the subgroups without vasopressor use and AKI, or those with a SOFA score  
5  
6  $\leq 10$ .  
7  
8

9 Growing evidence indicates that immune dysregulation (especially cellular  
10 immunity), including pro-inflammatory or anti-inflammatory responses during  
11 different stages, is common in cases of sepsis <sup>19</sup>. Recently, studies have reported that  
12 platelets play an important role in both the immunomodulatory and inflammatory  
13 process <sup>20 21</sup>, by inducing the release of inflammatory cytokines <sup>22</sup> and interacting with  
14 different kinds of bacteria and immune cells, including neutrophils, T-lymphocytes,  
15 NK-cells and macrophages, which contribute to the initiation or exacerbation of the  
16 inflammatory process <sup>23</sup>. Low lymphocyte counts, which to a certain degree represent  
17 a suppressed immune and inflammatory response <sup>24 25</sup>, have also been reported to be  
18 associated with inflammatory diseases, such as cardiovascular disease <sup>26</sup> and type II  
19 diabetes <sup>27</sup>.  
20  
21  
22  
23  
24  
25  
26  
27  
28  
29  
30  
31  
32  
33  
34  
35  
36

37 Based on these findings, the PLR was suggested as being a novel systematic  
38 inflammatory indicator <sup>28</sup>, and its use was initially reported in the prognostic  
39 prediction of neoplastic disorders, such as hepatocellular carcinoma and breast cancer.  
40 Accumulating evidence suggests that elevated PLRs are strongly associated with  
41 increased systemic inflammation, which may contribute to the progression and  
42 prognoses of many disorders, such as atherosclerosis <sup>29</sup> and diabetes mellitus <sup>30</sup>.  
43  
44  
45  
46  
47  
48  
49  
50  
51  
52

53 In contrast to our findings, Zheng et al. <sup>10</sup> reported that both high and low PLRs  
54 are associated with increased mortality, among critically ill patients with AKI, after  
55 adjustment for the disease severity score in the Cox proportional hazards models. In  
56  
57  
58  
59  
60

1  
2  
3  
4 that study, unlike in ours, a significant association was also observed in patients with  
5  
6 vasopressin use. Several factors may contribute to this inconsistency between the  
7  
8 findings, such as the use of different cohorts, PLR knots, and definitions of vasopressor  
9  
10 use. It is worth noting that, as the association between PLRs and outcomes varies  
11  
12 greatly between different cohorts, the inter-heterogeneity within critically ill patients  
13  
14 may also lead to a biased conclusion.  
15  
16  
17

18  
19 Akbas et al. indicated that a high PLR was positively associated with increased  
20  
21 epicardial adipose tissue deposition in diabetes patients <sup>31</sup>; this may be caused by  
22  
23 higher inflammation rates. Wang et al. <sup>32</sup> reviewed 134 patients with lung  
24  
25 adenocarcinoma, and reported that high PLRs (> 150) were independently  
26  
27 associated with shorter disease-free days and lower overall survival rates. Another  
28  
29 study <sup>33</sup>, including 270 patients with hepatocellular carcinoma, found that elevated  
30  
31 PLRs (above 220) were predictors of poor prognoses, while low PLRs (< 248.0) were  
32  
33 associated with a lower tumor, node and metastasis stage, and low surgery incidence,  
34  
35 in 695 patients with lung cancer <sup>34</sup>. Despite the fact that the study cohorts used in  
36  
37 those studies were quite different from those used in ours, the reported PLR knots  
38  
39 were quite similar to ours. However, the small sample sizes in those studies limited  
40  
41 the statistical power for further stratification and subgroup analysis of low PLR. In the  
42  
43 current study, we noticed that high PLRs (> 250) were associated with increased  
44  
45 hospital mortality. As higher platelet levels, to a certain extent, are prognostic of  
46  
47 inflammation of a higher severity and low lymphocyte counts may represent a  
48  
49 suppressed immune and inflammatory response <sup>24 25</sup>, an increase in the PLR may  
50  
51  
52  
53  
54  
55  
56  
57  
58  
59  
60

1  
2  
3  
4 reflect the degree of the inflammatory and immune response to the infection, which  
5  
6 is related to a poor prognosis.  
7

8  
9 We also detected a non-significant association between low PLRs and mortality,  
10  
11 in the case of sepsis. The association between low PLRs and outcomes was also  
12  
13 reported in several studies. In a retrospective study<sup>35</sup> including 899 cases of laryngeal  
14  
15 cancer, patients were divided into three PLR categories (low ( $\leq 119.55$ ), moderate ( $>$   
16  
17  $119.55$  and  $\leq 193.55$ ), and high ( $> 193.55$ )), and only patients with high PLRs  
18  
19 experienced poor outcomes, including malnutrition and more advanced cancer stage;  
20  
21 the association between outcomes and PLR levels were non-significant for those with  
22  
23 low PLRs. Despite the cohort of that study being different from ours, the conclusion  
24  
25 was consistent with that of our study. In the case of sepsis, a low platelet count is  
26  
27 potentially associated with poor outcomes. In a large study including 931 patients with  
28  
29 sepsis, Claushuis et al. reported that patients with a low platelet count at ICU  
30  
31 admission had a higher disease severity score and increased mortality risk<sup>36</sup>.  
32  
33 Furthermore, thrombocytopenia--one of the most common hemostatic disorders in  
34  
35 the case of sepsis--which is related with platelet consumption, was also associated  
36  
37 with higher mortality<sup>37</sup>. However, in the present study, a significant association  
38  
39 between low PLR and mortality was not detected. Further studies are needed to  
40  
41 validate this conclusion.  
42  
43  
44  
45  
46  
47  
48  
49  
50  
51

52  
53 Furthermore, according to the subgroup analysis, the association between high  
54  
55 PLR and mortality became non-significant in the subgroups with vasopressor use, AKI,  
56  
57 or a SOFA score  $> 10$ ; this association remained significant in the other subgroups. This  
58  
59  
60

1  
2  
3  
4 finding further supported our speculation that there may be an interaction between  
5  
6 PLR and disease severity. To the best of our knowledge, ours is the first study to report  
7  
8 this interaction. However, the underlying mechanism of this interaction remains  
9  
10 largely unknown. A critical characteristic of sepsis is fluid resuscitation, and, in the  
11  
12 current study, patients with vasopressor use, AKI, or a SOFA score > 10, to a certain  
13  
14 degree, represented patients with inflammation of a higher severity, and they may  
15  
16 have a stronger need for fluid resuscitation. We also noticed that the fluid balance  
17  
18 within 48 hours after ICU admission was significantly larger in these subgroups. It  
19  
20 needs to be further investigated if fluid resuscitation affects the prognostic value of  
21  
22 the PLR.  
23  
24  
25  
26  
27  
28  
29

30 One of the strengths of our study is the large sample size, which enabled us to  
31  
32 adjust for confounding factors and perform subgroup analyses. However, there are  
33  
34 also several limitations to our study. First, the MIMIC III database comprises data on  
35  
36 patients from 2001; since then, the guidelines for sepsis have changed significantly.  
37  
38 The most recent definition of Sepsis 3.0 was used in the current study, and this may  
39  
40 have introduced selection bias despite the fact that most of the basic interventions  
41  
42 (use of fluids, vasopressors, and antimicrobial agents) remained the same.  
43  
44 Furthermore, as a decrease in the platelet count was a part of the SOFA score, using  
45  
46 the definition of Sepsis 3.0, to a certain degree, may lead to a relatively low mean  
47  
48 platelet count and potential multi-collinearity. This bias cannot be fully avoided.  
49  
50 However, the potential multi-collinearity was verified in all the logistic models. Second,  
51  
52 the platelet count can be affected by many cofounders, such as kinds of  
53  
54  
55  
56  
57  
58  
59  
60

1  
2  
3  
4 malignancies, immunological factors and kinds of drugs. However, due to the  
5  
6 nature of retrospective study, these situations cannot be identified in this database.  
7  
8  
9 In addition, in the logistic model using PLR as a continuous variable (Table 2), the OR  
10  
11 was relatively small, despite the wide PLR range. Caution is therefore needed when  
12  
13 interpreting these findings. Third, septic shock is a special subgroup of sepsis. However,  
14  
15 patients with septic shock could not be distinguished in this study. Thus, patients were  
16  
17 divided into subgroups, according to the existence of vasopressor use, AKI, or a SOFA  
18  
19 score >10, which, to a certain extent, indicates the presence of an inflammatory  
20  
21 response of a higher severity. Fourth, one of the main hypotheses of our study was  
22  
23 the interaction effect between disease severity and PLR; yet, this interaction term was  
24  
25 not introduced in the logistic model due to the U-shaped association between PLR and  
26  
27 mortality. Further prospective studies are needed to verify our hypothesis. Finally, as  
28  
29 high PLRs are associated with poor outcomes in various disorders while low PLRs are  
30  
31 not, it is not clear if interventions aimed at changing the PLR value may improve  
32  
33 outcomes. Finally, as  
34  
35 high PLRs are associated with poor outcomes in various disorders while low PLRs are  
36  
37 not, it is not clear if interventions aimed at changing the PLR value may improve  
38  
39 outcomes.  
40  
41  
42

### 43 **Conclusion**

44  
45 In patients with sepsis, a high PLR was significantly associated with poor survival,  
46  
47 while the association was non-significant for those with a low PLR. However, the  
48  
49 former association became non-significant in patients with more severe conditions,  
50  
51 including those with vasopressor use, AKI, or a SOFA score > 10. Future studies are  
52  
53 needed to verify our hypothesis.  
54  
55  
56

57  
58 **Financial support and sponsorship:** This research received no specific grant from  
59  
60 any funding agency in the public, commercial or not-for-profit sectors.

**Ethical approval:** All the data presented in this study were extracted from an online database named “MIMIC III,” which was approved by the review boards of the Massachusetts Institute of Technology and Beth Israel Deaconess Medical Center. Thus, requirement for individual patient consent was waived because the study did not impact clinical care and all protected health information was de-identified.

**Acknowledgments:** None.

**Conflicts of interest:** None.

**Authors' contributions:**

Yanfei Shen.: Responsible for data extraction and writing of the manuscript.

Xinmei Huang.: Responsible for data analysis.

Weimin Zhang.: Responsible for data validation.

**Data sharing statement:** The full data set is available from the corresponding author at snow.shen@hotmail.com. However, reanalysis of the full data need to be approved by MIMIC III Institute.

## REFERENCES

1. Vincent JL. Emerging therapies for the treatment of sepsis. *Current opinion in anaesthesiology* 2015;28(4):411-6. doi: 10.1097/ACO.0000000000000210 [published Online First: 2015/06/19]
2. Cohen J, Vincent JL, Adhikari NK, et al. Sepsis: a roadmap for future research. *The Lancet Infectious diseases* 2015;15(5):581-614. doi: 10.1016/S1473-3099(15)70112-X [published Online First: 2015/05/02]
3. Angus DC, van der Poll T. Severe sepsis and septic shock. *The New England journal of medicine* 2013;369(9):840-51. doi: 10.1056/NEJMra1208623 [published Online First: 2013/08/30]
4. Peake SL, Delaney A, Bailey M, et al. Goal-directed resuscitation for patients with early septic shock. *The New England journal of medicine* 2014;371(16):1496-506. doi: 10.1056/NEJMoa1404380 [published Online First: 2014/10/02]
5. Pierrakos C, Vincent JL. Sepsis biomarkers: a review. *Critical care (London, England)* 2010;14(1):R15. doi: 10.1186/cc8872 [published Online First: 2010/02/11]
6. Vincent JL, Pereira AJ, Gleeson J, et al. Early management of sepsis. *Clinical and experimental emergency medicine* 2014;1(1):3-7. doi: 10.15441/ceem.14.005 [published Online First: 2014/09/30]
7. Hwang YJ, Chung SP, Park YS, et al. Newly designed delta neutrophil index-to-serum albumin ratio prognosis of early mortality in severe sepsis. *The American journal of emergency medicine* 2015;33(11):1577-82. doi: 10.1016/j.ajem.2015.06.012 [published Online First: 2015/08/05]
8. Kutlucan L, Kutlucan A, Basaran B, et al. The predictive effect of initial complete blood count of

- intensive care unit patients on mortality, length of hospitalization, and nosocomial infections. *European review for medical and pharmacological sciences* 2016;20(8):1467-73. [published Online First: 2016/05/11]
9. Hudzik B, Szkodzinski J, Korzonek-Szlacheta I, et al. Platelet-to-lymphocyte ratio predicts contrast-induced acute kidney injury in diabetic patients with ST-elevation myocardial infarction. *Biomarkers in medicine* 2017;11(10):847-56. doi: 10.2217/bmm-2017-0120 [published Online First: 2017/10/05]
10. Zheng CF, Liu WY, Zeng FF, et al. Prognostic value of platelet-to-lymphocyte ratios among critically ill patients with acute kidney injury. *Critical care (London, England)* 2017;21(1):238. doi: 10.1186/s13054-017-1821-z [published Online First: 2017/09/09]
11. Zheng J, Cai J, Li H, et al. Neutrophil to Lymphocyte Ratio and Platelet to Lymphocyte Ratio as Prognostic Predictors for Hepatocellular Carcinoma Patients with Various Treatments: a Meta-Analysis and Systematic Review. *Cellular physiology and biochemistry : international journal of experimental cellular physiology, biochemistry, and pharmacology* 2017;44(3):967-81. doi: 10.1159/000485396 [published Online First: 2017/11/28]
12. Toda M, Tsukioka T, Izumi N, et al. Platelet-to-lymphocyte ratio predicts the prognosis of patients with non-small cell lung cancer treated with surgery and postoperative adjuvant chemotherapy. *Thoracic cancer* 2017 doi: 10.1111/1759-7714.12547 [published Online First: 2017/11/07]
13. Singer M, Deutschman CS, Seymour CW, et al. The Third International Consensus Definitions for Sepsis and Septic Shock (Sepsis-3). *Jama* 2016;315(8):801-10. doi: 10.1001/jama.2016.0287 [published Online First: 2016/02/24]
14. Kellum JA, Lameire N. Diagnosis, evaluation, and management of acute kidney injury: a KDIGO summary (Part 1). *Critical care (London, England)* 2013;17(1):204. doi: 10.1186/cc11454 [published Online First: 2013/02/12]
15. Lameire N, Kellum JA. Contrast-induced acute kidney injury and renal support for acute kidney injury: a KDIGO summary (Part 2). *Critical care (London, England)* 2013;17(1):205. doi: 10.1186/cc11455 [published Online First: 2013/02/12]
16. Zavada J, Hoste E, Cartin-Ceba R, et al. A comparison of three methods to estimate baseline creatinine for RIFLE classification. *Nephrology, dialysis, transplantation : official publication of the European Dialysis and Transplant Association - European Renal Association* 2010;25(12):3911-8. doi: 10.1093/ndt/gfp766 [published Online First: 2010/01/27]
17. Mickey RM, Greenland S. The impact of confounder selection criteria on effect estimation. *Am J Epidemiol* 1989;129(1):125-37.
18. Zhang Z, Lu B, Ni H, et al. Prediction of pulmonary edema by plasma protein levels in patients with sepsis. *J Crit Care* 2012;27(6):623-9. doi: 10.1016/j.jcrc.2012.08.007
19. Boomer JS, To K, Chang KC, et al. Immunosuppression in patients who die of sepsis and multiple organ failure. *Jama* 2011;306(23):2594-605. doi: 10.1001/jama.2011.1829 [published Online First: 2011/12/22]
20. Cho SY, Jeon YL, Kim W, et al. Mean platelet volume and mean platelet volume/platelet count ratio in infective endocarditis. *Platelets* 2014;25(8):559-61. doi: 10.3109/09537104.2013.857394 [published Online First: 2013/11/12]
21. Azab B, Shah N, Akerman M, et al. Value of platelet/lymphocyte ratio as a predictor of all-cause mortality after non-ST-elevation myocardial infarction. *Journal of thrombosis and thrombolysis*



- 2012;34(3):326-34. doi: 10.1007/s11239-012-0718-6 [published Online First: 2012/04/03]
22. Nording HM, Seizer P, Langer HF. Platelets in inflammation and atherogenesis. *Frontiers in immunology* 2015;6:98. doi: 10.3389/fimmu.2015.00098 [published Online First: 2015/03/24]
23. Kim CH, Kim SJ, Lee MJ, et al. An increase in mean platelet volume from baseline is associated with mortality in patients with severe sepsis or septic shock. *PloS one* 2015;10(3):e0119437. doi: 10.1371/journal.pone.0119437 [published Online First: 2015/03/06]
24. Manzoli TF, Delgado AF, Troster EJ, et al. Lymphocyte count as a sign of immunoparalysis and its correlation with nutritional status in pediatric intensive care patients with sepsis: A pilot study. *Clinics (Sao Paulo)* 2016;71(11):644-49. doi: 10.6061/clinics/2016(11)05 [published Online First: 2016/12/17]
25. Felmet KA, Hall MW, Clark RS, et al. Prolonged lymphopenia, lymphoid depletion, and hypoprolactinemia in children with nosocomial sepsis and multiple organ failure. *J Immunol* 2005;174(6):3765-72. [published Online First: 2005/03/08]
26. Nunez J, Minana G, Bodi V, et al. Low lymphocyte count and cardiovascular diseases. *Current medicinal chemistry* 2011;18(21):3226-33. [published Online First: 2011/06/16]
27. Otton R, Soriano FG, Verlengia R, et al. Diabetes induces apoptosis in lymphocytes. *The Journal of endocrinology* 2004;182(1):145-56. [published Online First: 2004/07/01]
28. Akboga MK, Canpolat U, Yayla C, et al. Association of Platelet to Lymphocyte Ratio With Inflammation and Severity of Coronary Atherosclerosis in Patients With Stable Coronary Artery Disease. *Angiology* 2016;67(1):89-95. doi: 10.1177/0003319715583186 [published Online First: 2015/04/30]
29. Gary T, Pichler M, Belaj K, et al. Platelet-to-lymphocyte ratio: a novel marker for critical limb ischemia in peripheral arterial occlusive disease patients. *PloS one* 2013;8(7):e67688. doi: 10.1371/journal.pone.0067688 [published Online First: 2013/07/12]
30. Mertoglu C, Gunay M. Neutrophil-Lymphocyte ratio and Platelet-Lymphocyte ratio as useful predictive markers of prediabetes and diabetes mellitus. *Diabetes & metabolic syndrome* 2017;11 Suppl 1:S127-S31. doi: 10.1016/j.dsx.2016.12.021 [published Online First: 2016/12/27]
31. Akbas EM, Hamur H, Demirtas L, et al. Predictors of epicardial adipose tissue in patients with type 2 diabetes mellitus. *Diabetology & metabolic syndrome* 2014;6:55. doi: 10.1186/1758-5996-6-55 [published Online First: 2014/05/14]
32. Wang YQ, Zhi QJ, Wang XY, et al. Prognostic value of combined platelet, fibrinogen, neutrophil to lymphocyte ratio and platelet to lymphocyte ratio in patients with lung adenosquamous cancer. *Oncology letters* 2017;14(4):4331-38. doi: 10.3892/ol.2017.6660 [published Online First: 2017/09/26]
33. Wang Y, Attar BM, Fuentes HE, et al. Evaluation of the prognostic value of platelet to lymphocyte ratio in patients with hepatocellular carcinoma. *Journal of gastrointestinal oncology* 2017;8(6):1065-71. doi: 10.21037/jgo.2017.09.06
34. Wang L, Liang D, Xu X, et al. The prognostic value of neutrophil to lymphocyte and platelet to lymphocyte ratios for patients with lung cancer. *Oncology letters* 2017;14(6):6449-56. doi: 10.3892/ol.2017.7047 [published Online First: 2017/11/23]
35. Mao Y, Fu Y, Gao Y, et al. Platelet-to-lymphocyte ratio predicts long-term survival in laryngeal cancer. *European archives of oto-rhino-laryngology : official journal of the European Federation of Oto-Rhino-Laryngological Societies (EUFOS) : affiliated with the German Society for Oto-Rhino-Laryngology - Head and Neck Surgery* 2017 doi: 10.1007/s00405-017-4849-4 [published Online



1  
2  
3 First: 2017/12/25]

4 36. Claushuis TA, van Vught LA, Scicluna BP, et al. Thrombocytopenia is associated with a dysregulated  
5 host response in critically ill sepsis patients. *Blood* 2016;127(24):3062-72. doi: 10.1182/blood-  
6 2015-11-680744 [published Online First: 2016/03/10]

7  
8 37. Semeraro F, Colucci M, Caironi P, et al. Platelet Drop and Fibrinolytic Shutdown in Patients With  
9 Sepsis. *Critical care medicine* 2017 doi: 10.1097/CCM.0000000000002919 [published Online  
10 First: 2017/12/21]

11  
12  
13  
14  
15  
16  
17  
18  
19  
20  
21  
22  
23  
24  
25  
26  
27  
28  
29  
30  
31  
32  
33  
34  
35  
36  
37  
38  
39  
40  
41  
42  
43  
44  
45  
46  
47  
48  
49  
50  
51  
52  
53  
54  
55  
56  
57  
58  
59  
60

For peer review only

**Figure legend:**

Figure 1: The crude and adjusted odds ratios in the subgroup analysis. PLR level 2 was used as the reference level in all the logistic models.

Abbreviations: PLR, platelet-to-lymphocyte ratio; AKI, acute kidney injury; SOFA, Sequential Organ Failure Assessment; CI, confidence interval

1  
2  
3  
4  
5  
6  
7  
8  
9  
10  
11  
12  
13  
14  
15  
16  
17  
18  
19  
20  
21  
22  
23  
24  
25  
26  
27  
28  
29  
30  
31  
32  
33  
34  
35  
36  
37  
38  
39  
40  
41  
42  
43  
44  
45  
46  
47  
48  
49  
50  
51  
52  
53  
54  
55  
56  
57  
58  
59  
60

For peer review only

Table 1 Comparison of baseline characteristics within three PLR levels

| Variable                                     | PLR ≤ 150<br>(n = 1780) | 150 < PLR ≤ 250<br>(n = 1380) | PLR > 250<br>(n = 2377) | p       |
|----------------------------------------------|-------------------------|-------------------------------|-------------------------|---------|
| Age (years)                                  | 63.0 ± 16.6             | 65.0 ± 16.6                   | 66.1 ± 15.5             | < 0.001 |
| Gender (male) [n (%)]                        | 805 (45.2)              | 590 (42.7)                    | 1096 (46.1)             | 0.133   |
| BMI (Kg/m <sup>2</sup> )                     | 30.8 ± 8.9              | 34.1 ± 13.5                   | 35.2 ± 39.5             | 0.001   |
| <b>Ethnicity</b>                             |                         |                               |                         |         |
| White [n (%)]                                | 1202 (67.5)             | 987 (71.5)                    | 1761 (74.0)             | 0.754   |
| Black [n (%)]                                | 180 (10.1)              | 101 (7.3)                     | 146 (6.1)               | < 0.001 |
| Asian [n (%)]                                | 39 (2.2)                | 30 (2.1)                      | 71 (2.9)                | 0.169   |
| Emergency [n (%)]                            | 1641 (92.1)             | 1284 (93.0)                   | 2229 (93.7)             | 0.138   |
| <b>ICU type</b>                              |                         |                               |                         |         |
| MICU [n (%)]                                 | 953 (53.5)              | 727 (52.6)                    | 1362 (57.2)             | 0.008   |
| CCU/CSRU [n (%)]                             | 413 (23.2)              | 323 (23.4)                    | 453 (19.0)              | 0.001   |
| TSICU/SICU [n (%)]                           | 414 (23.2)              | 330 (23.9)                    | 562 (23.6)              | 0.908   |
| <b>Vasopressors</b>                          |                         |                               |                         |         |
| Norepinephrine [n (%)]                       | 566 (31.7)              | 374 (27.1)                    | 711 (29.9)              | 0.016   |
| Dopamine [n (%)]                             | 198 (11.1)              | 151 (10.9)                    | 256 (10.7)              | 0.013   |
| Epinephrine [n (%)]                          | 67 (3.7)                | 28 (2.0)                      | 37 (1.5)                | < 0.001 |
| Vasopressin [n (%)]                          | 156 (8.7)               | 88 (6.3)                      | 172 (7.2)               | 0.033   |
| Overall vasopressor use                      | 701 (39.3)              | 482 (34.9)                    | 858 (36.1)              | 0.022   |
| <b>Fluid input/output</b>                    |                         |                               |                         |         |
| Fluid intake (ml/kg/48hr)                    | 99.9 ± 60.9             | 90.7 ± 57.6                   | 97.2 ± 61.2             | < 0.001 |
| Urine output (ml/kg/48hr)                    | 42.0 ± 32.0             | 42.9 ± 30.3                   | 41.9 ± 29.5             | 0.5659  |
| Fluid balance (ml/kg/48hr)                   | 46.7 ± 59.4             | 38.3 ± 55.1                   | 46.0 ± 60.4             | < 0.001 |
| <b>Infection site</b>                        |                         |                               |                         |         |
| Respiratory infection                        | 1048 (58.8)             | 929 (67.3)                    | 1580 (66.4)             | < 0.001 |
| Blood infection                              | 768 (43.1)              | 509 (36.8)                    | 998 (41.9)              | 0.001   |
| Urinary infection                            | 549 (30.8)              | 409 (29.6)                    | 682 (28.6)              | 0.323   |
| Abdominal infection                          | 245 (13.7)              | 159 (11.5)                    | 334 (14.0)              | 0.072   |
| Cerebral infection                           | 153 (8.5)               | 106 (7.6)                     | 169 (7.1)               | 0.206   |
| <b>Disease severity scores</b>               |                         |                               |                         |         |
| SOFA on ICU admission<br>median (IQR)        | 6 (4–9)                 | 5 (4–8)                       | 5 (3–7)                 | < 0.001 |
| Maximum SOFA during ICU stay<br>median (IQR) | 10 (7–14)               | 9 (7–12)                      | 9 (7–12)                | < 0.001 |
| <b>Laboratory outcomes</b>                   |                         |                               |                         |         |
| Maximum serum creatinine (mg/L)              | 2.5 ± 2.7               | 2.2 ± 2.1                     | 2.1 ± 1.9               | < 0.001 |
| Minimum hemoglobin level (g/dl)              | 8.3 ± 1.7               | 8.69 ± 1.7                    | 8.4 ± 1.6               | < 0.001 |
| Maximum serum sodium (mmol/L)                | 145.1 ± 5.4             | 145.0 ± 5.2                   | 144.6 ± 5.1             | 0.009   |
| Maximum serum lactate (mmol/L)               | 4.1 ± 3.8 (n=1536)      | 3.4 ± 3.1 (n=1174)            | 3.1 ± 3.0 (n=2112)      | < 0.001 |
| Platelet count (10 <sup>9</sup> /L)          | 146.7 ± 88.0            | 225.1 ± 107.2                 | 197.5 ± 163.4           | < 0.001 |

|                                            |             |              |               |         |
|--------------------------------------------|-------------|--------------|---------------|---------|
| <b>Lymphocyte count (10<sup>9</sup>/L)</b> | 2.1 ± 5.7   | 1.1 ± 0.5    | 0.68 ± 0.4    | < 0.001 |
| <b>PLR</b>                                 | 91.8 ± 37.1 | 195.8 ± 28.6 | 557.5 ± 484.8 | < 0.001 |
| <b>Clinical outcomes</b>                   |             |              |               |         |
| <b>ICU LOS</b>                             | 9.9 ± 10.1  | 9.3 ± 8.7    | 10.1 ± 9.9    | 0.071   |
| <b>Hospital LOS</b>                        | 17.7 ± 15.1 | 16.6 ± 13.5  | 17.2 ± 13.7   | 0.082   |
| <b>AKI [n (%)]</b>                         | 861 (48.3)  | 601 (43.5)   | 1080 (45.4)   | 0.022   |
| <b>Hospital mortality [n (%)]</b>          | 475 (26.6)  | 291 (21.0)   | 621 (26.1)    | < 0.001 |

Abbreviations:

PLR: platelet to lymphocyte ratio; BMI body mass index; MICU, multiple intensive care unit; CCU, coronary care unit; CSRU, cardiac surgery care unit; TSICU, traumatic surgical intensive care unit; SICU, surgical intensive care unit; SOFA, sequential organ failure assessment; SAPS II, Simplified Acute Physiology Score II; IQR, interquartile range; LOS length of stay; AKI, acute kidney injury.

For peer review only

Table 2 multivariable logistic regressions of PLR using linear spline function

| Variables                          | Crude Odds ratio | 95% CI          | p       | Adjusted Odds ratio | 95% CI          | p       |
|------------------------------------|------------------|-----------------|---------|---------------------|-----------------|---------|
| <b>PLR (<math>\leq 200</math>)</b> | 0.997            | 0.996 – 0.998   | < 0.001 | 0.9993              | 0.9980 – 1.0006 | 0.319   |
| <b>PLR (<math>&gt; 200</math>)</b> | 1.0002           | 1.0001 – 1.0004 | 0.001   | 1.0002              | 1.0000 – 1.0003 | 0.025   |
| <b>Age (<math>&gt; 65</math>)</b>  | 1.77             | 1.56 – 2.11     | < 0.001 | 2.32                | 1.99 – 2.64     | < 0.001 |
| <b>Maximum SOFA</b>                | 1.20             | 1.18 – 1.22     | < 0.001 | 1.18                | 1.16 – 1.20     | < 0.001 |
| <b>Urinary infection</b>           | 0.66             | 0.57 – 0.76     | < 0.001 | 0.65                | 0.56 – 0.76     | < 0.001 |
| <b>Respiratory infection</b>       | 1.29             | 1.13 – 1.47     | < 0.001 | 1.25                | 1.09 – 1.45     | 0.002   |
| <b>Blood infection</b>             | 2.14             | 1.89 – 2.42     | < 0.001 | 1.49                | 1.29 – 1.71     | < 0.001 |
| <b>Fluid balance (ml/kg/48hrs)</b> | 1.006            | 1.005 – 1.007   | < 0.001 | 1.002               | 1.0008 – 1.0031 | 0.001   |
| <b>MICU</b>                        | 1.34             | 1.15 – 1.56     | < 0.001 | 1.15                | 0.97 – 1.37     | 0.089   |
| <b>CCU/CSRU</b>                    | 1.22             | 1.01 – 1.47     | 0.032   | 1.03                | 0.84 – 1.26     | 0.752   |

Note: The mean variance inflation factor was 2.89 and p value of goodness of fit was 0.632.

Abbreviation: PLR platelet to lymphocyte ratio; CI confidence interval; SOFA sequential organ failure assessment; MICU multiple intensive care unit; CCU coronary care unit; CSRU cardiac surgery care unit.

Table 3 Association between three PLR levels and hospital mortality

|                | PLR ≤ 150          |         | 150 < PLR ≤ 250 |   | PLR > 250          |       |
|----------------|--------------------|---------|-----------------|---|--------------------|-------|
|                | OR (95% CI)        | p       | OR (95% CI)     | p | OR (95% CI)        | p     |
| <b>Model 1</b> | 1.41 (1.19 – 1.67) | < 0.001 | Ref.            | – | 1.28 (1.09 – 1.51) | 0.002 |
| <b>Model 2</b> | 1.34 (1.13 – 1.59) | 0.001   | Ref.            | – | 1.23 (1.05 – 1.45) | 0.009 |
| <b>Model 3</b> | 1.35 (1.14 – 1.61) | 0.001   | Ref.            | – | 1.21 (1.03 – 1.43) | 0.018 |
| <b>Model 4</b> | 1.15 (0.96 – 1.38) | 0.123   | Ref.            | – | 1.29 (1.09 – 1.53) | 0.003 |

Adjusted covariates: Model 1 = age, admitted ICU type. Model 2 = Model 1+ (fluid balance at 48 hours after ICU admission). Model 3= Model 2 + (infection sites). Model 4 = Model 3+ (Maximum SOFA score during ICU stay).

The mean variance inflation factor was 2.53 and p value of goodness of fit was 0.665 for Model 4.

Abbreviations: PLR platelet to lymphocyte ratio; OR = odds ratio; CI= confidence interval; Ref reference category.

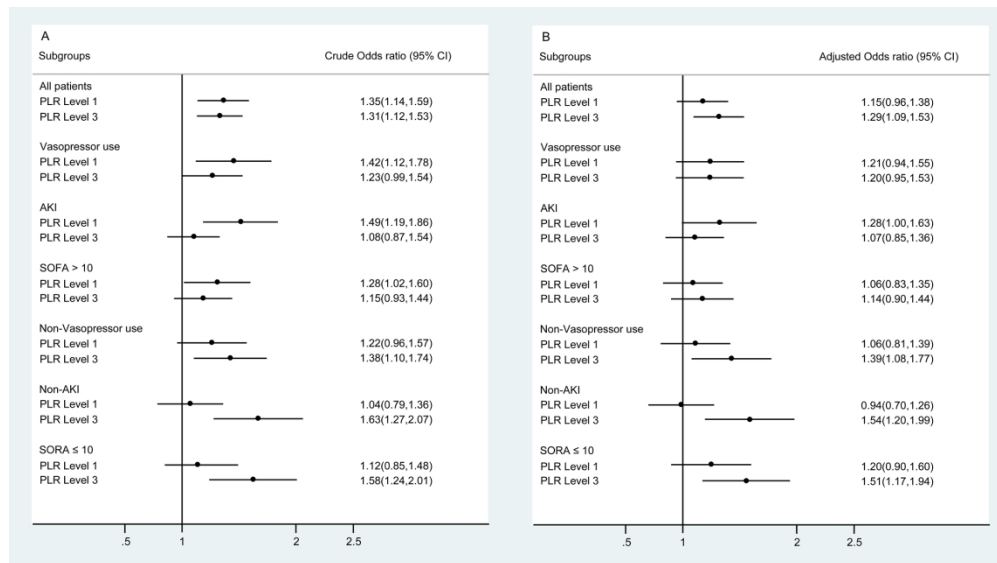

The crude and adjusted odds ratios in the subgroup analysis. PLR level 2 was used as the reference level in all the logistic models.

Abbreviations: PLR, platelet-to-lymphocyte ratio; AKI, acute kidney injury; SOFA, Sequential Organ Failure Assessment; CI, confidence interval

182x102mm (300 x 300 DPI)

Table S1 Adjusted odds ratio of hospital mortality using PLR as design variable in multivariable logistic regression

| Variables                   | Odds ratio | 95% CI          | p         |
|-----------------------------|------------|-----------------|-----------|
| PLR Level 1 ( $\leq 150$ )  | 1.15       | 0.96 – 1.38     | 0.123     |
| PLR Level 2 (151 ~ 250)     | Ref.       | –               | –         |
| PLR Level 3 ( $> 250$ )     | 1.29       | 1.09 – 1.53     | 0.003     |
| Age ( $> 65$ )              | 2.27       | 1.97 – 2.62     | $< 0.001$ |
| Maximum SOFA                | 1.19       | 1.16 – 1.21     | $< 0.001$ |
| Urinary infection           | 0.65       | 0.56 – 0.76     | $< 0.001$ |
| Respiratory infection       | 1.25       | 1.08 – 1.44     | 0.002     |
| Blood infection             | 1.49       | 1.29 – 1.71     | $< 0.001$ |
| Fluid balance (ml/kg/48hrs) | 1.002      | 1.0008 – 1.0031 | 0.001     |
| MICU                        | 1.16       | 0.98 – 1.37     | 0.082     |
| CCU/CSRU                    | 1.04       | 0.84 – 1.27     | 0.700     |

Note: The mean variance inflation factor (VIF) was 2.53 and p value of goodness of fit was 0.665.

Abbreviation: PLR platelet to lymphocyte ratio; CI confidence interval; SOFA sequential organ failure assessment; MICU multiple intensive care unit; CCU coronary care unit; CSRU cardiac surgery care unit.



Table S2 Comparisons of subgroups according to the existence of vasopressor use, AKI and SOFA score

| Variables                             | Vasopressor-use<br>(n = 2554) | Non-Vasopressor-use<br>(n = 2983) | p       | AKI<br>(n = 2542) | Non-AKI<br>(n = 2995) | p       | SOFA > 10<br>(n = 2390) | SOFA ≤ 10<br>(n = 2147) | p       |
|---------------------------------------|-------------------------------|-----------------------------------|---------|-------------------|-----------------------|---------|-------------------------|-------------------------|---------|
| age                                   | 66.3 ± 15.2                   | 63.6 ± 16.8                       | < 0.001 | 65.1 ± 15.4       | 64.6 ± 16.8           | 0.211   | 64.0 ± 15.7             | 65.5 ± 16.4             | < 0.001 |
| Vasopressor-use [n (%)]               | -                             | -                                 | -       | 1321              | 1233                  | < 0.001 | 1554                    | 1000                    | < 0.001 |
| Fluid intake (ml/kg/48hr)             | 114.4 ± 661.                  | 81.1 ± 50.0                       | < 0.001 | 94.3 ± 62.0       | 98.3 ± 58.8           | 0.013   | 110.7 ± 65.5            | 85.6 ± 53.6             | < 0.001 |
| Fluid balance (ml/kg/48hr)            | 63.2 ± 64.1                   | 28.1 ± 48.5                       | < 0.001 | 48.4 ± 60.9       | 40.8 ± 56.9           | < 0.001 | 62.0 ± 64.1             | 30.8 ± 50.6             | < 0.001 |
| Maximum SOFA median (IQR)             | 12 (9 – 14)                   | 8 (6 – 11)                        | < 0.001 | 11 (8 – 14)       | 9 (7 – 11)            | < 0.001 | 13 (12 – 15)            | 7 (6 – 9)               | < 0.001 |
| Platelet count (10 <sup>9</sup> /L)   | 225.0 ± 240.1                 | 236.0 ± 148.7                     | 0.005   | 219.2 ±<br>143.4  | 240.9 ± 145.5         | < 0.001 | 208.4 ± 147.1           | 248.1 ± 140.8           | < 0.001 |
| Lymphocyte count (10 <sup>9</sup> /L) | 1.26 ± 3.32                   | 1.28 ± 3.32                       | 0.890   | 1.21 ± 2.21       | 1.32 ± 4.03           | 0.246   | 1.24 ± 3.42             | 1.29 ± 3.24             | 0.529   |
| Hospital LOS                          | 17.8 ± 14.3                   | 16.7 ± 14.1                       | 0.002   | 19.7 ± 15.6       | 15.1 ± 12.3           | < 0.001 | 19.6 ± 14.6             | 15.5 ± 13.4             | < 0.001 |
| AKI [n (%)]                           | 1321                          | 1221                              | < 0.001 | -                 | -                     | -       | 1360                    | 1182                    | < 0.001 |
| Hospital mortality [n (%)]            | 777                           | 612                               | < 0.001 | 875               | 514                   | < 0.001 | 884                     | 505                     | < 0.001 |

Abbreviation: SOFA sequential organ failure assessment; IQR interquartile range; LOS length of stay; AKI acute kidney injury.

Table S3 Risk factors associated with in-hospital mortality

| Variables                             | Odds ratio | 95% CI        | p       |
|---------------------------------------|------------|---------------|---------|
| Age (> 65)                            | 1.77       | 1.56 – 2.01   | < 0.001 |
| Gender (male)                         | 0.91       | 0.81 – 1.03   | 0.173   |
| BMI (Kg/m <sup>2</sup> )              | 1.00       | 0.99 – 1.00   | 0.485   |
| TSICU/SICU                            | Ref.       | –             | –       |
| MICU                                  | 1.34       | 1.15 – 1.56   | < 0.001 |
| CCU/CSRU                              | 1.22       | 1.01 – 1.47   | 0.032   |
| Fluid balance (ml/kg/48hrs)           | 1.006      | 1.005 – 1.007 | < 0.001 |
| Urine output (ml/kg/48hrs)            | 0.98       | 0.98 – 0.98   | < 0.001 |
| Respiratory infection                 | 1.29       | 1.13 – 1.47   | < 0.001 |
| Blood infection                       | 2.14       | 1.89 – 2.42   | < 0.001 |
| Urinary infection                     | 0.66       | 0.57 – 0.76   | < 0.001 |
| Abdominal infection                   | 0.93       | 0.77 – 1.11   | 0.458   |
| Cerebral infection                    | 0.66       | 0.51 – 0.85   | 0.002   |
| SOFA on ICU admission                 | 1.15       | 1.13 – 1.17   | < 0.001 |
| Maximum SOFA                          | 1.20       | 1.18 – 1.22   | < 0.001 |
| Maximum serum creatinine (mg/L)       | 1.15       | 1.12 – 1.19   | < 0.001 |
| Minimum hemoglobin level (g/dl)       | 0.84       | 0.81 – 0.88   | < 0.001 |
| Maximum serum sodium (mmol/L)         | 1.02       | 1.01 – 1.02   | < 0.001 |
| Platelet count (10 <sup>9</sup> /L)   | 0.998      | 0.997 – 0.998 | < 0.001 |
| Lymphocyte count (10 <sup>9</sup> /L) | 0.972      | 0.934 – 1.01  | 0.163   |

Abbreviations: BMI body mass index; MICU, multiple intensive care unit; CCU, coronary care unit; CSRU, cardiac surgery care unit; TSICU, traumatic surgical intensive care unit; SICU, surgical intensive care unit; SOFA, sequential organ failure assessment;

Figure S1 Crude relationship between hospital mortality and PLR

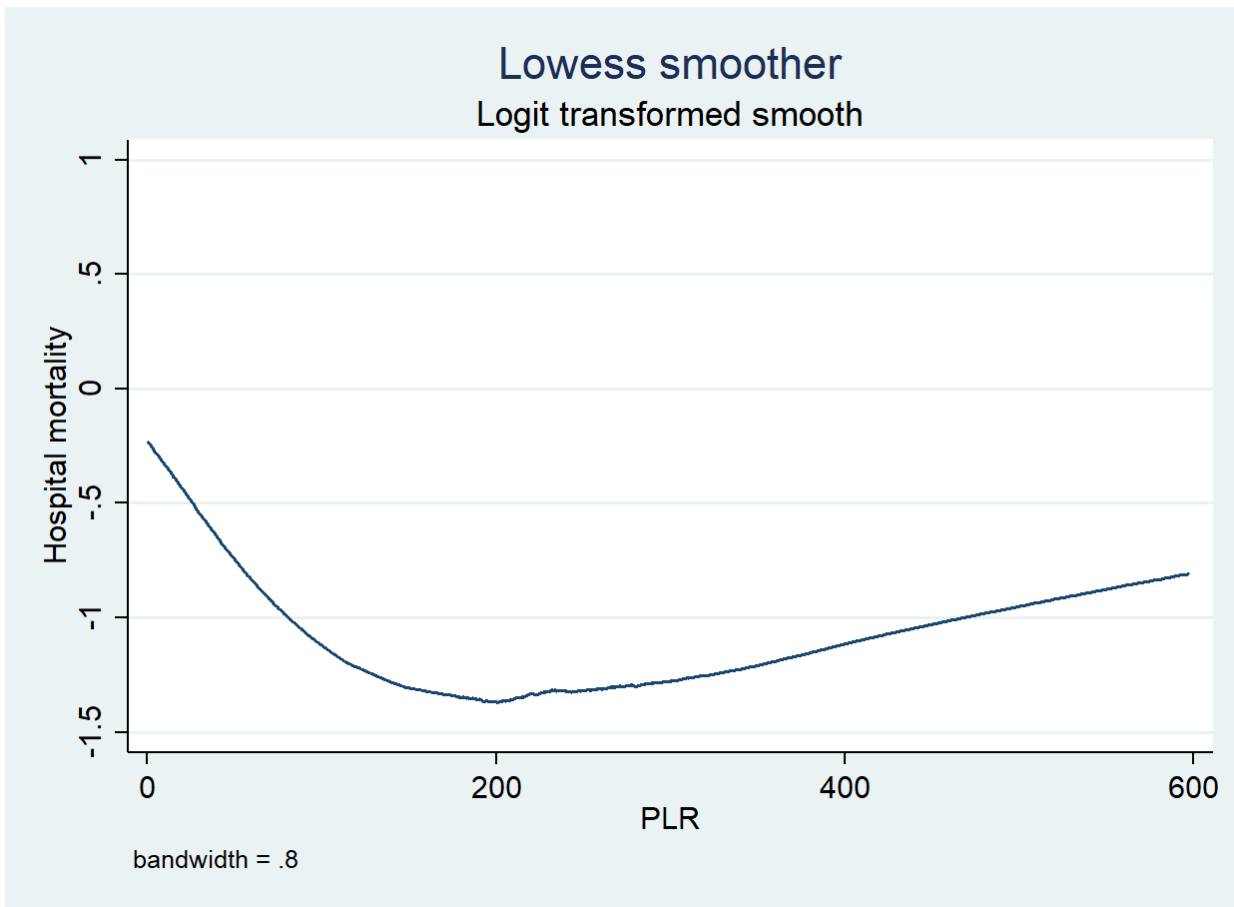

view only

**STROBE 2007 (v4) Statement—Checklist of items that should be included in reports of *cohort studies***

| Section/Topic                | Item # | Recommendation                                                                                                                                                                       | Reported on page # |
|------------------------------|--------|--------------------------------------------------------------------------------------------------------------------------------------------------------------------------------------|--------------------|
| Title and abstract           | 1      | (a) Indicate the study's design with a commonly used term in the title or the abstract                                                                                               | 1                  |
|                              |        | (b) Provide in the abstract an informative and balanced summary of what was done and what was found                                                                                  | 2                  |
| <b>Introduction</b>          |        |                                                                                                                                                                                      |                    |
| Background/rationale         | 2      | Explain the scientific background and rationale for the investigation being reported                                                                                                 | 4                  |
| Objectives                   | 3      | State specific objectives, including any prespecified hypotheses                                                                                                                     | 4                  |
| <b>Methods</b>               |        |                                                                                                                                                                                      |                    |
| Study design                 | 4      | Present key elements of study design early in the paper                                                                                                                              | 5-6                |
| Setting                      | 5      | Describe the setting, locations, and relevant dates, including periods of recruitment, exposure, follow-up, and data collection                                                      | 5-7                |
| Participants                 | 6      | (a) Give the eligibility criteria, and the sources and methods of selection of participants. Describe methods of follow-up                                                           | 5                  |
|                              |        | (b) For matched studies, give matching criteria and number of exposed and unexposed                                                                                                  |                    |
| Variables                    | 7      | Clearly define all outcomes, exposures, predictors, potential confounders, and effect modifiers. Give diagnostic criteria, if applicable                                             | 6                  |
| Data sources/<br>measurement | 8*     | For each variable of interest, give sources of data and details of methods of assessment (measurement). Describe comparability of assessment methods if there is more than one group | 4                  |
| Bias                         | 9      | Describe any efforts to address potential sources of bias                                                                                                                            | 7                  |
| Study size                   | 10     | Explain how the study size was arrived at                                                                                                                                            |                    |
| Quantitative variables       | 11     | Explain how quantitative variables were handled in the analyses. If applicable, describe which groupings were chosen and why                                                         | 6-7                |
| Statistical methods          | 12     | (a) Describe all statistical methods, including those used to control for confounding                                                                                                | 7-8                |
|                              |        | (b) Describe any methods used to examine subgroups and interactions                                                                                                                  | 7-8                |
|                              |        | (c) Explain how missing data were addressed                                                                                                                                          | 7                  |
|                              |        | (d) If applicable, explain how loss to follow-up was addressed                                                                                                                       | N/A.               |
|                              |        | (e) Describe any sensitivity analyses                                                                                                                                                | N/A.               |
| <b>Results</b>               |        |                                                                                                                                                                                      |                    |

|                          |     |                                                                                                                                                                                                              |       |
|--------------------------|-----|--------------------------------------------------------------------------------------------------------------------------------------------------------------------------------------------------------------|-------|
| Participants             | 13* | (a) Report numbers of individuals at each stage of study—eg numbers potentially eligible, examined for eligibility, confirmed eligible, included in the study, completing follow-up, and analysed            | 8     |
|                          |     | (b) Give reasons for non-participation at each stage                                                                                                                                                         | N/A.  |
|                          |     | (c) Consider use of a flow diagram                                                                                                                                                                           | N/A.  |
| Descriptive data         | 14* | (a) Give characteristics of study participants (eg demographic, clinical, social) and information on exposures and potential confounders                                                                     | 8     |
|                          |     | (b) Indicate number of participants with missing data for each variable of interest                                                                                                                          | 7     |
|                          |     | (c) Summarise follow-up time (eg, average and total amount)                                                                                                                                                  | N/A.  |
| Outcome data             | 15* | Report numbers of outcome events or summary measures over time                                                                                                                                               | 9     |
| Main results             | 16  | (a) Give unadjusted estimates and, if applicable, confounder-adjusted estimates and their precision (eg, 95% confidence interval). Make clear which confounders were adjusted for and why they were included | 7     |
|                          |     | (b) Report category boundaries when continuous variables were categorized                                                                                                                                    | 7     |
|                          |     | (c) If relevant, consider translating estimates of relative risk into absolute risk for a meaningful time period                                                                                             | N/A.  |
| Other analyses           | 17  | Report other analyses done—eg analyses of subgroups and interactions, and sensitivity analyses                                                                                                               | 7     |
| <b>Discussion</b>        |     |                                                                                                                                                                                                              |       |
| Key results              | 18  | Summarise key results with reference to study objectives                                                                                                                                                     | 10    |
| <b>Limitations</b>       |     |                                                                                                                                                                                                              |       |
| Interpretation           | 20  | Give a cautious overall interpretation of results considering objectives, limitations, multiplicity of analyses, results from similar studies, and other relevant evidence                                   | 14-15 |
| Generalisability         | 21  | Discuss the generalisability (external validity) of the study results                                                                                                                                        | N/A.  |
| <b>Other information</b> |     |                                                                                                                                                                                                              |       |
| Funding                  | 22  | Give the source of funding and the role of the funders for the present study and, if applicable, for the original study on which the present article is based                                                | 16    |

\*Give information separately for cases and controls in case-control studies and, if applicable, for exposed and unexposed groups in cohort and cross-sectional studies.

**Note:** An Explanation and Elaboration article discusses each checklist item and gives methodological background and published examples of transparent reporting. The STROBE checklist is best used in conjunction with this article (freely available on the Web sites of PLoS Medicine at <http://www.plosmedicine.org/>, Annals of Internal Medicine at <http://www.annals.org/>, and Epidemiology at <http://www.epidem.com/>). Information on the STROBE Initiative is available at [www.strobe-statement.org](http://www.strobe-statement.org).
